# Supplementary material for: Projecting shifts in thermal habitat for 686 species on the North American continental shelf
Source: PubMed Central journal article supplement (PMC5955691; doi:10.1371/journal.pone.0196127), 2018-05-16
Supplement: pone.0196127.s001.pdf [file pone.0196127.s001.pdf]

| <b>Species</b>               | <b>devPA</b> | <b>devBiom</b> | <b>Region</b> | <b>RCP</b> | <b>Uncert.</b> | <b>Shift</b> | <b>sd_shift</b> | <b>%Hab.</b> | <b>sd_hab</b> |
|------------------------------|--------------|----------------|---------------|------------|----------------|--------------|-----------------|--------------|---------------|
| acanthephyra pelagica        | 0.68         | 0.90           | E. Canada     | 26         | medium         | 164.7        | 124.6           | 13.1         | 20.3          |
|                              |              |                |               | 85         | low            | 437.6        | 150.2           | 10.6         | 42.7          |
|                              |              |                | G. Mexico     | 26         | low            | 297.5        | 147.9           | -77.6        | 14.5          |
|                              |              |                |               | 85         | low            | 401.7        | 192.1           | -98.0        | 1.1           |
| acanthostracion quadricornis | 0.48         | 0.97           | SE U.S.       | 26         | low            | 53.7         | 44.6            | 149.0        | 128.1         |
|                              |              |                |               | 85         | low            | 148.1        | 87.8            | 2006.8       | 1266.9        |
|                              |              |                | G. Mexico     | 26         | low            | 19.0         | 17.3            | 24.1         | 20.7          |
|                              |              |                |               | 85         | low            | 55.9         | 27.1            | 127.7        | 47.9          |
| achelous spinicarpus         | 0.53         | 0.89           | G. Mexico     | 26         | high           | 18.0         | 39.4            | 20.2         | 52.8          |
| achelous spinimanus          | 0.37         | 0.96           | SE U.S.       | 26         | medium         | 17.3         | 9.4             | 61.7         | 52.5          |
|                              |              |                |               | 85         | low            | 46.4         | 22.0            | 160.9        | 124.1         |
| actinauge verrilli           | 0.35         | 0.15           | G. Mexico     | 26         | low            | 21.9         | 11.6            | 15.3         | 10.7          |
|                              |              |                |               | 85         | medium         | 39.3         | 17.3            | 27.6         | 15.1          |
|                              |              |                |               | 26         | low            | 136.9        | 78.4            | -1.8         | 5.7           |
| aforia circinata             | 0.42         | 0.97           | E. Bering S.  | 85         | low            | 383.9        | 139.8           | 0.7          | 11.9          |
|                              |              |                |               | 26         | medium         | 53.7         | 36.5            | -36.4        | 56.7          |
| albatrossia pectoralis       | 0.54         | 0.92           | G. Alaska     | 85         | low            | 139.7        | 39.2            | -96.5        | 9.1           |
|                              |              |                |               | 26         | low            | 365.8        | 278.9           | 15.7         | 26.9          |
| alectis ciliaris             | 0.24         | 0.94           | SE U.S.       | 85         | low            | 1184.3       | 302.9           | 147.1        | 82.5          |
|                              |              |                |               | 26         | low            | 8.0          | 5.1             | 26.3         | 17.1          |
|                              |              |                | G. Mexico     | 85         | medium         | 32.6         | 35.4            | 137.9        | 53.7          |
|                              |              |                |               | 26         | low            | 17.0         | 12.4            | 29.0         | 19.4          |
| alepocephalus bairdii        | 0.49         | 0.88           | E. Canada     | 85         | medium         | 34.4         | 16.0            | 109.8        | 36.4          |
|                              |              |                |               | 26         | medium         | 157.0        | 140.0           | 5.6          | 24.0          |
| alepocephalus tenebrosus     | 0.71         | 0.97           | G. Alaska     | 85         | low            | 494.3        | 198.4           | 21.7         | 45.4          |
|                              |              |                |               | 26         | high           | 299.5        | 280.8           | 5.3          | 34.0          |
| allosmerus elongatus         | 0.32         | 0.89           | G. Alaska     | 85         | medium         | 1417.7       | 567.6           | 268.9        | 172.0         |
|                              |              |                |               | 26         | low            | 384.2        | 292.8           | 39.7         | 29.0          |
| alosa aestivalis             | 0.41         | 0.78           | NE U.S.       | 85         | low            | 1491.7       | 379.5           | 226.7        | 125.5         |
|                              |              |                |               | 26         | high           | 204.7        | 171.2           | -2.3         | 55.9          |
| alosa pseudoharengus         | 0.37         | 0.78           | NE U.S.       | 85         | high           | 400.2        | 208.1           | -66.5        | 25.3          |
|                              |              |                |               | 26         | high           | 149.9        | 141.6           | -24.9        | 24.9          |
| alosa sapidissima            | 0.27         | 0.79           | NE U.S.       | 85         | medium         | 660.0        | 272.3           | -71.5        | 21.1          |
|                              |              |                |               | 26         | low            | 65.0         | 50.9            | 20.6         | 28.6          |
|                              |              |                |               | 85         | low            | 337.6        | 188.0           | -19.9        | 57.5          |
|                              | 0.43         | 0.90           | West U.S.     | 26         | low            | 332.6        | 246.4           | 34.8         | 35.0          |
|                              |              |                |               | 85         | low            | 1600.7       | 381.0           | 151.7        | 106.9         |

| <b>Species</b>          | <b>devPA</b> | <b>devBiom</b> | <b>Region</b> | <b>RCP</b> | <b>Uncert.</b> | <b>Shift</b> | <b>sd_shift</b> | <b>%Hab.</b> | <b>sd_hab</b> |
|-------------------------|--------------|----------------|---------------|------------|----------------|--------------|-----------------|--------------|---------------|
| aluterus schoepfii      | 0.34         | 0.94           | SE U.S.       | 26         | medium         | 17.1         | 10.8            | 84.1         | 70.4          |
|                         |              |                |               | 85         | medium         | 41.1         | 26.4            | 1032.8       | 537.1         |
|                         |              |                | G. Mexico     | 26         | high           | 11.1         | 9.7             | 24.1         | 24.5          |
|                         |              |                |               | 85         | medium         | 23.4         | 24.4            | 143.4        | 59.9          |
| amblyraja radiata       | 0.40         | 0.87           | E. Canada     | 26         | low            | 118.2        | 70.4            | 5.5          | 11.6          |
|                         |              |                |               | 85         | medium         | 442.1        | 244.0           | -15.5        | 35.6          |
| ammodytes dubius        | 0.35         | 0.76           | E. Canada     | 26         | medium         | 92.8         | 59.3            | -23.0        | 15.5          |
|                         |              |                |               | 85         | high           | 256.4        | 135.8           | -64.9        | 24.3          |
| ammodytes hexapterus    | 0.23         | 0.37           | E. Bering S.  | 26         | low            | 22.1         | 18.1            | 2.2          | 18.4          |
|                         |              |                |               | 85         | medium         | 69.7         | 34.8            | -22.9        | 52.5          |
| ampheraster marianus    | 0.43         | 0.95           | G. Alaska     | 26         | medium         | 237.3        | 202.4           | 2.6          | 17.8          |
|                         |              |                |               | 85         | medium         | 1273.6       | 417.8           | 76.8         | 49.3          |
| amusium papyraceum      | 0.56         | 0.92           | G. Mexico     | 26         | medium         | 0.2          | 0.3             | 130.8        | 127.7         |
|                         |              |                |               | 85         | medium         | 0.8          | 1.6             | 714.2        | 704.3         |
| anadara baughmani       | 0.49         | 0.93           | G. Mexico     | 26         | low            | 36.4         | 26.4            | 30.3         | 33.5          |
|                         |              |                |               | 85         | medium         | 51.0         | 34.2            | 120.9        | 71.5          |
| anarhichas denticulatus | 0.45         | 0.86           | E. Canada     | 26         | low            | 133.9        | 114.6           | 2.4          | 12.3          |
|                         |              |                |               | 85         | low            | 456.2        | 150.1           | -32.0        | 41.2          |
| anarhichas lupus        | 0.29         | 0.89           | E. Canada     | 26         | low            | 124.8        | 65.4            | 3.4          | 9.8           |
|                         |              |                |               | 85         | medium         | 432.4        | 245.3           | -24.0        | 35.5          |
| anarhichas minor        | 0.44         | 0.85           | E. Canada     | 26         | low            | 71.3         | 49.3            | -18.4        | 32.8          |
|                         |              |                |               | 85         | low            | 202.7        | 105.2           | -66.3        | 42.6          |
| anasimus latus          | 0.47         | 0.91           | G. Mexico     | 26         | medium         | 0.4          | 0.5             | 82.9         | 84.4          |
|                         |              |                |               | 85         | low            | 1.9          | 2.7             | 153.6        | 182.5         |
| anchoa hepsetus         | 0.40         | 0.91           | SE U.S.       | 26         | medium         | 15.4         | 16.7            | 4.7          | 13.7          |
|                         |              |                |               | 85         | high           | 159.1        | 173.8           | 41.0         | 42.0          |
|                         |              |                | G. Mexico     | 26         | medium         | 19.6         | 14.3            | -8.2         | 10.2          |
|                         |              |                |               | 85         | medium         | 61.2         | 42.2            | -64.1        | 18.9          |
| anchoa lyolepis         | 0.26         | 0.95           | SE U.S.       | 26         | low            | 16.2         | 14.9            | 7.5          | 11.0          |
|                         |              |                |               | 85         | low            | 91.2         | 37.8            | -0.3         | 19.9          |
|                         |              |                | G. Mexico     | 26         | low            | 24.0         | 17.7            | -12.6        | 9.3           |
|                         |              |                |               | 85         | low            | 82.2         | 30.9            | -46.2        | 9.8           |
| anchoa mitchilli        | 0.32         | 0.84           | SE U.S.       | 26         | high           | 68.8         | 91.8            | 0.3          | 25.2          |
|                         |              |                |               | 85         | low            | 589.3        | 226.9           | 150.5        | 134.1         |
|                         |              |                | G. Mexico     | 26         | medium         | 24.0         | 24.3            | -24.5        | 12.8          |
|                         |              |                |               | 85         | high           | 53.3         | 43.5            | -77.3        | 7.9           |

| <b>Species</b>              | <b>devPA</b> | <b>devBiom</b> | <b>Region</b> | <b>RCP</b> | <b>Uncert.</b> | <b>Shift</b> | <b>sd_shift</b> | <b>%Hab.</b> | <b>sd_hab</b> |
|-----------------------------|--------------|----------------|---------------|------------|----------------|--------------|-----------------|--------------|---------------|
| ancylopsetta dilecta        | 0.49         | 0.91           | SE U.S.       | 26         | medium         | 77.8         | 96.4            | 97.9         | 117.2         |
|                             |              |                |               | 85         | low            | 321.9        | 137.1           | 621.0        | 1508.7        |
|                             |              |                | G. Mexico     | 26         | medium         | 68.8         | 68.7            | -7.0         | 23.3          |
|                             |              |                |               | 85         | low            | 254.5        | 150.9           | -74.5        | 24.6          |
| ancylopsetta ommata         | 0.41         | 0.98           | SE U.S.       | 26         | low            | 9.1          | 7.7             | 23.6         | 27.6          |
|                             |              |                |               | 85         | low            | 57.4         | 38.7            | 66.0         | 40.2          |
|                             |              |                | G. Mexico     | 26         | low            | 8.0          | 4.2             | 1.2          | 3.2           |
|                             |              |                |               | 85         | high           | 16.7         | 10.1            | -5.4         | 9.2           |
| anoplopoma fimbria          | 0.46         | 0.24           | G. Alaska     | 26         | low            | 181.9        | 116.1           | 0.2          | 4.6           |
| anthoptilum grandiflorum    | 0.42         | 0.98           | G. Alaska     | 85         | low            | 689.2        | 105.9           | -10.9        | 14.9          |
|                             |              |                |               | 26         | medium         | 249.6        | 194.2           | 5.9          | 31.9          |
| antimora microlepis         | 0.57         | 0.92           | West U.S.     | 85         | medium         | 1463.4       | 414.8           | 77.7         | 85.1          |
|                             |              |                |               | 26         | low            | 262.4        | 170.8           | 159.3        | 81.3          |
| antimora rostrata           | 0.74         | 0.91           | E. Canada     | 85         | high           | 1022.4       | 865.5           | 2040.3       | 4826.3        |
|                             |              |                |               | 26         | medium         | 185.1        | 139.3           | -0.8         | 16.3          |
| aphrocallistes vastus       | 0.27         | 0.69           | E. Bering S.  | 85         | low            | 526.1        | 189.3           | 5.3          | 40.8          |
|                             |              |                |               | 26         | medium         | 271.0        | 177.6           | 17.3         | 36.5          |
| aphrodita negligens         | 0.19         | 0.78           | E. Bering S.  | 85         | low            | 709.1        | 355.2           | -16.7        | 110.0         |
|                             |              |                |               | 26         | high           | 48.1         | 64.0            | -22.0        | 31.3          |
| apostichopus leukothele     | 0.34         | 0.92           | G. Alaska     | 85         | medium         | 128.0        | 122.1           | -86.0        | 17.4          |
|                             |              |                |               | 26         | low            | 290.3        | 168.2           | 14.8         | 16.3          |
| apristurus brunneus         | 0.59         | 0.97           | G. Alaska     | 85         | low            | 888.4        | 229.7           | 16.3         | 51.6          |
|                             |              |                |               | 26         | high           | 228.7        | 196.1           | -5.2         | 9.6           |
| apristurus profundorum      | 0.50         | 0.92           | E. Canada     | 85         | high           | 924.4        | 370.9           | 24.6         | 25.5          |
|                             |              |                |               | 26         | low            | 159.7        | 103.8           | -2.9         | 19.4          |
| aptocyclus ventricosus      | 0.16         | 0.87           | E. Bering S.  | 85         | low            | 324.0        | 139.1           | 24.5         | 35.4          |
|                             |              |                |               | 26         | low            | 79.2         | 55.9            | -28.3        | 26.6          |
| archosargus probatocephalus | 0.32         | 0.97           | SE U.S.       | 85         | low            | 225.2        | 69.0            | -83.9        | 24.0          |
|                             |              |                |               | 26         | low            | 34.5         | 25.9            | -13.8        | 11.0          |
|                             |              |                | G. Mexico     | 85         | low            | 333.8        | 170.8           | -46.4        | 16.9          |
|                             |              |                |               | 26         | medium         | 23.5         | 18.3            | -24.4        | 15.5          |
| arctomelon stearnsii        | 0.23         | 0.83           | E. Bering S.  | 85         | medium         | 49.2         | 25.6            | -82.7        | 7.3           |
|                             |              |                |               | 26         | low            | 139.5        | 107.0           | -34.2        | 48.2          |
| arctozenus risso            | 0.44         | 0.84           | E. Canada     | 85         | low            | 528.2        | 131.9           | -93.9        | 12.1          |
|                             |              |                |               | 26         | medium         | 303.3        | 216.2           | 23.9         | 76.6          |
|                             |              |                |               | 85         | medium         | 672.1        | 278.9           | 52.4         | 69.8          |

| <b>Species</b>                | <b>devPA</b> | <b>devBiom</b> | <b>Region</b> | <b>RCP</b> | <b>Uncert.</b> | <b>Shift</b> | <b>sd_shift</b> | <b>%Hab.</b> | <b>sd_hab</b> |
|-------------------------------|--------------|----------------|---------------|------------|----------------|--------------|-----------------|--------------|---------------|
| arenaeus cribrarius           | 0.48         | 0.95           | SE U.S.       | 26         | medium         | 19.6         | 15.8            | 28.0         | 42.3          |
|                               |              |                |               | 85         | medium         | 60.7         | 35.5            | 7.7          | 101.4         |
|                               |              |                | G. Mexico     | 26         | medium         | 31.3         | 19.6            | 7.8          | 18.7          |
|                               |              |                |               | 85         | medium         | 82.4         | 60.1            | -37.8        | 19.6          |
| argentina sialis              | 0.32         | 0.95           | West U.S.     | 26         | low            | 167.0        | 124.1           | 42.9         | 36.8          |
|                               |              |                |               | 85         | low            | 791.2        | 259.1           | 257.0        | 176.8         |
| argentina silus               | 0.35         | 0.75           | E. Canada     | 26         | low            | 118.6        | 92.8            | 24.2         | 33.9          |
|                               |              |                |               | 85         | low            | 491.3        | 205.7           | 25.2         | 123.1         |
| argis dentata                 | 0.55         | 0.85           | E. Canada     | 26         | low            | 79.2         | 66.7            | -28.7        | 32.6          |
|                               |              |                |               | 85         | medium         | 199.0        | 116.7           | -79.9        | 28.6          |
| argis lar                     | 0.16         | 0.95           | E. Bering S.  | 26         | low            | 32.5         | 15.3            | -46.2        | 46.7          |
|                               |              |                |               | 85         | low            | 86.5         | 42.5            | -98.1        | 3.9           |
|                               |              |                | E. Bering S.  | 26         | low            | 40.4         | 29.3            | -41.5        | 34.1          |
| argopecten gibbus             | 0.31         | 0.86           | SE U.S.       | 26         | medium         | 87.0         | 93.4            | 243.3        | 294.1         |
|                               |              |                |               | 85         | medium         | 401.8        | 207.6           | 5218.8       | 5224.3        |
|                               |              |                | G. Mexico     | 26         | medium         | 37.6         | 40.5            | -0.3         | 29.7          |
|                               |              |                |               | 85         | medium         | 221.2        | 146.9           | -82.3        | 24.2          |
| ariopsis felis                | 0.43         | 0.98           | SE U.S.       | 26         | low            | 29.9         | 23.7            | 84.5         | 102.1         |
|                               |              |                |               | 85         | low            | 90.3         | 57.1            | 484.8        | 635.6         |
|                               |              |                | G. Mexico     | 26         | high           | 31.3         | 46.9            | -0.5         | 13.9          |
|                               |              |                |               | 85         | medium         | 95.8         | 99.5            | -57.1        | 24.0          |
| artediellus uncinatus         | 0.29         | 0.74           | E. Canada     | 26         | medium         | 202.1        | 195.5           | -14.1        | 42.0          |
|                               |              |                |               | 85         | high           | 621.4        | 472.5           | -57.9        | 28.5          |
| aspidophoroides bartoni       | 0.26         | 0.95           | E. Bering S.  | 26         | medium         | 89.5         | 69.1            | -33.5        | 65.6          |
|                               |              |                |               | 85         | low            | 184.1        | 87.1            | -97.5        | 5.6           |
| aspidophoroides monopterygius | 0.30         | 0.83           | E. Canada     | 26         | low            | 127.8        | 84.4            | -9.4         | 26.8          |
|                               |              |                |               | 85         | low            | 261.9        | 143.3           | -67.7        | 32.5          |
| aspidophoroides olrikii       | 0.49         | 0.89           | E. Canada     | 26         | low            | 120.7        | 79.0            | -35.6        | 39.2          |
|                               |              |                |               | 85         | medium         | 249.5        | 107.2           | -80.4        | 32.3          |
| asterias amurensis            | 0.70         | 0.94           | E. Bering S.  | 26         | medium         | 98.1         | 73.9            | -2.0         | 148.1         |
|                               |              |                |               | 85         | low            | 200.8        | 115.4           | -97.9        | 4.2           |
| astropecten cingulatus        | 0.46         | 0.92           | G. Mexico     | 26         | high           | 36.2         | 25.6            | 45.7         | 46.0          |
|                               |              |                |               | 85         | medium         | 51.9         | 57.2            | 297.0        | 168.7         |
| astropecten duplicatus        | 0.40         | 0.90           | G. Mexico     | 26         | medium         | 81.1         | 85.6            | 62.0         | 63.3          |
|                               |              |                |               | 85         | medium         | 312.2        | 199.1           | 15.6         | 98.8          |
| atheresthes stomias           | 0.58         | 0.89           | G. Alaska     | 26         | low            | 401.3        | 318.0           | 9.3          | 28.3          |
|                               |              |                |               | 85         | low            | 1522.8       | 341.0           | 15.7         | 60.3          |

| <b>Species</b>             | <b>devPA</b> | <b>devBiom</b> | <b>Region</b> | <b>RCP</b> | <b>Uncert.</b> | <b>Shift</b> | <b>sd_shift</b> | <b>%Hab.</b> | <b>sd_hab</b> |
|----------------------------|--------------|----------------|---------------|------------|----------------|--------------|-----------------|--------------|---------------|
| atlantopandalus propinquus | 0.41         | 0.83           | E. Canada     | 26         | medium         | 91.1         | 52.9            | 22.9         | 24.1          |
|                            |              |                |               | 85         | medium         | 339.1        | 254.6           | 15.3         | 42.6          |
| bagre marinus              | 0.35         | 0.98           | SE U.S.       | 26         | medium         | 82.9         | 86.0            | 515.7        | 437.2         |
|                            |              |                |               | 85         | high           | 145.9        | 93.1            | 13751.7      | 17110.7       |
|                            |              |                | G. Mexico     | 26         | high           | 49.2         | 53.9            | 439.4        | 476.4         |
|                            |              |                |               | 85         | high           | 136.7        | 124.6           | 30123.2      | 49134.1       |
| bairdiella chrysoura       | 0.42         | 0.93           | SE U.S.       | 26         | low            | 29.7         | 24.0            | -11.8        | 10.0          |
|                            |              |                |               | 85         | medium         | 434.7        | 328.9           | 2.6          | 56.6          |
|                            |              |                | G. Mexico     | 26         | low            | 16.8         | 9.0             | -7.8         | 5.8           |
|                            |              |                |               | 85         | medium         | 30.9         | 16.4            | -22.5        | 7.8           |
| balistes capriscus         | 0.36         | 0.93           | SE U.S.       | 26         | medium         | 21.4         | 14.4            | 50.8         | 44.8          |
|                            |              |                |               | 85         | low            | 74.2         | 47.5            | 503.0        | 160.3         |
|                            |              |                | G. Mexico     | 26         | low            | 39.8         | 34.9            | 13.4         | 20.2          |
|                            |              |                |               | 85         | low            | 183.8        | 91.6            | -28.1        | 48.0          |
| bathyagonus nigripinnis    | 0.28         | 0.15           | G. Alaska     | 26         | low            | 161.0        | 109.3           | -3.4         | 7.8           |
|                            |              |                |               | 85         | low            | 739.3        | 258.6           | -14.5        | 19.4          |
| bathybembix bairdii        | 0.60         | 0.96           | G. Alaska     | 26         | medium         | 327.3        | 342.3           | 3.0          | 28.0          |
|                            |              |                |               | 85         | medium         | 1412.6       | 514.7           | 215.7        | 129.7         |
| bathylagus euryops         | 0.68         | 0.91           | E. Canada     | 26         | low            | 131.5        | 74.2            | 6.5          | 13.4          |
|                            |              |                |               | 85         | medium         | 232.4        | 114.4           | 4.9          | 29.3          |
| bathymaster signatus       | 0.24         | 0.03           | E. Bering S.  | 26         | low            | 104.6        | 59.3            | -2.9         | 6.1           |
|                            |              |                |               | 85         | low            | 276.0        | 83.1            | -24.0        | 12.1          |
| bathypolypus arcticus      | 0.38         | 0.75           | NE U.S.       | 26         | low            | 158.9        | 135.1           | 27.0         | 61.2          |
|                            |              |                |               | 85         | low            | 728.5        | 268.9           | -30.1        | 57.9          |
| bathyraja spinicauda       | 0.45         | 0.89           | E. Canada     | 26         | medium         | 153.9        | 131.6           | 3.9          | 16.8          |
|                            |              |                |               | 85         | low            | 556.2        | 195.5           | -12.1        | 42.0          |
| bellator militaris         | 0.38         | 0.87           | SE U.S.       | 26         | high           | 61.4         | 107.9           | 297.6        | 403.5         |
|                            |              |                |               | 85         | low            | 397.4        | 172.2           | 3129.0       | 3739.5        |
|                            |              |                | G. Mexico     | 26         | medium         | 55.8         | 67.9            | 3.6          | 29.3          |
|                            |              |                |               | 85         | medium         | 227.9        | 150.5           | -66.9        | 48.7          |
| beringius behringi         | 0.28         | 0.97           | E. Bering S.  | 26         | medium         | 72.0         | 44.7            | -38.6        | 60.8          |
|                            |              |                |               | 85         | medium         | 148.8        | 74.9            | -98.0        | 4.3           |
| berrysteuthis magister     | 0.37         | 0.10           | G. Alaska     | 26         | low            | 110.3        | 62.6            | -2.6         | 4.6           |
|                            |              |                |               | 85         | low            | 353.5        | 115.6           | -5.5         | 12.9          |
| bollmannia communis        | 0.38         | 0.91           | G. Mexico     | 26         | low            | 43.7         | 37.9            | -1.9         | 17.0          |
|                            |              |                |               | 85         | medium         | 133.4        | 79.9            | -72.9        | 24.1          |
| boltenia ovifera           | 0.46         | 0.95           | E. Bering S.  | 26         | medium         | 102.3        | 75.2            | -4.8         | 148.6         |
|                            |              |                |               | 85         | high           | 282.7        | 208.9           | -99.4        | 1.3           |

| <b>Species</b>         | <b>devPA</b> | <b>devBiom</b> | <b>Region</b> | <b>RCP</b> | <b>Uncert.</b> | <b>Shift</b> | <b>sd_shift</b> | <b>%Hab.</b> | <b>sd_hab</b> |
|------------------------|--------------|----------------|---------------|------------|----------------|--------------|-----------------|--------------|---------------|
| boreogadus saida       | 0.69         | 0.88           | E. Canada     | 26         | medium         | 71.6         | 63.0            | -30.4        | 38.0          |
|                        |              |                |               | 85         | medium         | 154.2        | 85.0            | -82.6        | 22.9          |
|                        | 0.61         | 0.96           | E. Bering S.  | 26         | medium         | 19.8         | 15.8            | -51.0        | 40.1          |
|                        |              |                |               | 85         | medium         | 73.7         | 72.2            | -98.4        | 2.8           |
| bothrocara brunneum    | 0.60         | 0.94           | G. Alaska     | 26         | medium         | 323.0        | 297.1           | 0.4          | 19.1          |
|                        |              |                |               | 85         | medium         | 1514.7       | 386.4           | 72.1         | 48.4          |
| bregmaceros atlanticus | 0.32         | 0.89           | G. Mexico     | 26         | low            | 48.3         | 43.5            | 25.4         | 31.1          |
|                        |              |                |               | 85         | low            | 156.1        | 84.7            | -32.3        | 52.5          |
| brevoortia patronus    | 0.36         | 0.89           | G. Mexico     | 26         | high           | 54.5         | 51.3            | 183.1        | 202.4         |
|                        |              |                |               | 85         | high           | 107.5        | 131.4           | 2513.7       | 1865.5        |
| brevoortia tyrannus    | 0.32         | 0.82           | SE U.S.       | 26         | medium         | 128.7        | 156.1           | -5.5         | 15.6          |
|                        |              |                |               | 85         | low            | 838.6        | 280.7           | 199.2        | 268.3         |
| brosme brosmes         | 0.37         | 0.89           | NE U.S.       | 26         | low            | 147.5        | 97.0            | 25.0         | 47.8          |
|                        |              |                |               | 85         | medium         | 674.4        | 295.0           | 1.9          | 90.2          |
| brotula barbata        | 0.39         | 0.90           | G. Mexico     | 26         | high           | 4.1          | 6.1             | -29.7        | 30.5          |
|                        |              |                |               | 85         | high           | 20.1         | 32.4            | -95.3        | 7.3           |
| buccinum angulosum     | 0.45         | 0.93           | E. Bering S.  | 26         | low            | 41.1         | 27.2            | -43.1        | 36.5          |
|                        |              |                |               | 85         | low            | 181.3        | 78.2            | -96.7        | 6.0           |
| buccinum plectrum      | 0.22         | 0.93           | E. Bering S.  | 26         | low            | 39.7         | 23.9            | -47.5        | 38.7          |
|                        |              |                |               | 85         | low            | 156.5        | 79.3            | -97.2        | 5.6           |
| buccinum polare        | 0.41         | 0.94           | E. Bering S.  | 26         | low            | 52.6         | 38.8            | -37.7        | 36.9          |
|                        |              |                |               | 85         | low            | 206.6        | 79.5            | -94.5        | 9.8           |
| buccinum scalariforme  | 0.37         | 0.95           | E. Bering S.  | 26         | low            | 50.1         | 35.3            | -41.8        | 42.0          |
|                        |              |                |               | 85         | low            | 158.2        | 66.4            | -94.6        | 11.6          |
| calamus leucosteus     | 0.32         | 0.92           | SE U.S.       | 26         | medium         | 35.3         | 29.4            | -7.2         | 27.9          |
|                        |              |                |               | 85         | high           | 179.0        | 171.3           | -55.6        | 17.1          |
|                        |              |                | G. Mexico     | 26         | low            | 56.4         | 50.0            | -22.8        | 13.5          |
|                        |              |                |               | 85         | medium         | 176.9        | 136.2           | -21.1        | 23.1          |
| calamus proridens      | 0.59         | 0.91           | SE U.S.       | 26         | high           | 19.9         | 36.7            | 1394.4       | 2563.2        |
|                        |              |                |               | 85         | medium         | 262.8        | 212.3           | 15545.2      | 21327.5       |
|                        |              |                | G. Mexico     | 26         | high           | 31.3         | 34.3            | 67.9         | 92.8          |
|                        |              |                |               | 85         | high           | 83.1         | 64.2            | 126.8        | 218.5         |
| calappa flammea        | 0.31         | 0.97           | SE U.S.       | 26         | high           | 11.1         | 13.4            | 8.3          | 10.5          |
|                        |              |                |               | 85         | high           | 85.4         | 107.3           | 36.5         | 31.9          |
|                        |              |                | G. Mexico     | 26         | medium         | 10.8         | 7.0             | -9.2         | 9.4           |
|                        |              |                |               | 85         | medium         | 49.4         | 27.5            | -32.2        | 19.1          |

| <b>Species</b>         | <b>devPA</b> | <b>devBiom</b> | <b>Region</b> | <b>RCP</b> | <b>Uncert.</b> | <b>Shift</b> | <b>sd_shift</b> | <b>%Hab.</b> | <b>sd_hab</b> |
|------------------------|--------------|----------------|---------------|------------|----------------|--------------|-----------------|--------------|---------------|
| calappa sulcata        | 0.41         | 0.98           | SE U.S.       | 26         | low            | 12.9         | 12.3            | 10.5         | 6.9           |
|                        |              |                |               | 85         | high           | 125.6        | 160.9           | 53.4         | 30.3          |
|                        |              |                | G. Mexico     | 26         | medium         | 4.6          | 2.9             | 5.4          | 3.9           |
|                        |              |                |               | 85         | high           | 8.7          | 6.5             | 17.4         | 9.0           |
| callinectes ornatus    | 0.46         | 0.95           | SE U.S.       | 26         | low            | 13.3         | 10.3            | 46.5         | 40.8          |
|                        |              |                |               | 85         | high           | 34.1         | 22.9            | 155.5        | 97.5          |
|                        |              |                | G. Mexico     | 26         | low            | 47.2         | 44.5            | 34.0         | 23.9          |
|                        |              |                |               | 85         | low            | 151.2        | 77.9            | 251.3        | 130.3         |
| callinectes sapidus    | 0.31         | 0.96           | SE U.S.       | 26         | low            | 25.7         | 20.3            | -10.0        | 10.1          |
|                        |              |                |               | 85         | high           | 263.6        | 262.6           | 21.7         | 54.2          |
|                        |              |                | G. Mexico     | 26         | low            | 10.5         | 5.7             | 6.8          | 9.4           |
|                        |              |                |               | 85         | high           | 43.1         | 22.3            | 0.1          | 21.3          |
| callinectes similis    | 0.60         | 0.94           | SE U.S.       | 26         | medium         | 30.2         | 32.4            | 108.7        | 106.9         |
|                        |              |                |               | 85         | low            | 78.0         | 44.5            | 709.2        | 525.9         |
|                        |              |                | G. Mexico     | 26         | medium         | 15.2         | 19.0            | 8.3          | 9.3           |
|                        |              |                |               | 85         | medium         | 29.2         | 24.0            | -18.6        | 25.9          |
| cancer borealis        | 0.24         | 0.80           | E. Canada     | 26         | high           | 272.6        | 248.1           | 0.2          | 26.4          |
|                        |              |                |               | 85         | medium         | 709.3        | 354.2           | -43.4        | 46.0          |
| cancer irroratus       | 0.30         | 0.72           | E. Canada     | 26         | high           | 364.3        | 517.3           | -30.8        | 55.0          |
|                        |              |                |               | 85         | high           | 891.8        | 586.1           | -80.9        | 26.5          |
| cancer productus       | 0.35         | 0.97           | West U.S.     | 26         | low            | 262.9        | 180.9           | 36.9         | 29.9          |
|                        |              |                |               | 85         | low            | 1377.6       | 401.6           | 121.5        | 106.2         |
| caranx crysos          | 0.32         | 0.94           | SE U.S.       | 26         | low            | 11.3         | 8.3             | 18.1         | 16.6          |
|                        |              |                |               | 85         | medium         | 132.2        | 132.6           | 170.4        | 88.5          |
|                        |              |                | G. Mexico     | 26         | high           | 24.2         | 18.3            | 24.6         | 20.7          |
|                        |              |                |               | 85         | medium         | 64.2         | 73.8            | 20.5         | 41.2          |
| caranx hippos          | 0.26         | 0.95           | SE U.S.       | 26         | low            | 33.3         | 22.5            | 27.7         | 20.0          |
|                        |              |                |               | 85         | high           | 313.8        | 352.1           | 247.1        | 110.0         |
|                        |              |                | G. Mexico     | 26         | medium         | 14.1         | 10.6            | 21.8         | 14.3          |
|                        |              |                |               | 85         | medium         | 22.7         | 16.2            | 121.8        | 34.2          |
| carcharhinus acronotus | 0.30         | 0.97           | SE U.S.       | 26         | low            | 41.6         | 37.8            | 25.5         | 17.0          |
|                        |              |                |               | 85         | medium         | 168.4        | 101.5           | 231.6        | 99.6          |
|                        |              |                | G. Mexico     | 26         | low            | 21.0         | 17.6            | 10.0         | 11.5          |
|                        |              |                |               | 85         | low            | 64.4         | 38.2            | 90.6         | 31.7          |
| carcharhinus plumbeus  | 0.35         | 0.96           | SE U.S.       | 26         | medium         | 67.6         | 79.9            | -0.6         | 9.0           |
|                        |              |                |               | 85         | low            | 753.6        | 331.1           | 14.9         | 24.9          |
|                        |              |                | G. Mexico     | 26         | medium         | 31.7         | 25.1            | -31.7        | 19.7          |
|                        |              |                |               | 85         | medium         | 48.9         | 41.0            | -91.4        | 4.1           |

| <b>Species</b>             | <b>devPA</b> | <b>devBiom</b> | <b>Region</b> | <b>RCP</b> | <b>Uncert.</b> | <b>Shift</b> | <b>sd_shift</b> | <b>%Hab.</b> | <b>sd_hab</b> |
|----------------------------|--------------|----------------|---------------|------------|----------------|--------------|-----------------|--------------|---------------|
| careproctus melanurus      | 0.44         | 0.93           | G. Alaska     | 26         | medium         | 325.2        | 300.1           | 3.7          | 11.6          |
|                            |              |                |               | 85         | medium         | 1437.2       | 356.3           | 33.9         | 42.1          |
| careproctus rastrinus      | 0.34         | 0.93           | E. Bering S.  | 26         | low            | 31.2         | 27.3            | -27.6        | 27.4          |
|                            |              |                |               | 85         | low            | 127.5        | 62.1            | -83.2        | 22.6          |
| caretta caretta            | 0.30         | 0.98           | SE U.S.       | 26         | low            | 13.8         | 10.4            | 11.3         | 15.2          |
|                            |              |                |               | 85         | medium         | 137.6        | 101.7           | 100.4        | 47.3          |
|                            |              |                | G. Mexico     | 26         | medium         | 13.8         | 15.2            | 0.4          | 4.9           |
|                            |              |                |               | 85         | low            | 39.1         | 26.9            | -23.6        | 13.6          |
| caulolatilus intermedius   | 0.47         | 0.91           | G. Mexico     | 26         | high           | 62.3         | 57.1            | -15.2        | 21.6          |
|                            |              |                |               | 85         | low            | 211.2        | 125.3           | -82.1        | 16.5          |
| centropristis ocyurus      | 0.43         | 0.93           | SE U.S.       | 26         | low            | 105.9        | 94.2            | 395.2        | 524.2         |
|                            |              |                |               | 85         | medium         | 373.1        | 204.8           | 7522.1       | 8960.7        |
|                            |              |                | G. Mexico     | 26         | medium         | 30.2         | 35.2            | 7.4          | 29.7          |
| centropristis philadelphia | 0.54         | 0.96           | SE U.S.       | 26         | low            | 19.3         | 15.8            | 49.7         | 37.8          |
|                            |              |                |               | 85         | low            | 83.1         | 48.1            | 225.4        | 137.2         |
|                            |              |                | G. Mexico     | 26         | medium         | 25.7         | 25.8            | 2.9          | 6.8           |
|                            |              |                |               | 85         | low            | 87.1         | 43.2            | -28.4        | 16.9          |
| centropristis striata      | 0.33         | 0.80           | SE U.S.       | 26         | medium         | 65.8         | 69.1            | -2.9         | 16.7          |
|                            |              |                |               | 85         | low            | 528.6        | 139.6           | 82.5         | 58.7          |
|                            |              |                | G. Mexico     | 26         | medium         | 54.4         | 43.0            | -41.2        | 21.0          |
|                            |              |                |               | 85         | medium         | 116.3        | 95.2            | -93.4        | 7.2           |
| centroscyllium fabricii    | 0.49         | 0.91           | E. Canada     | 26         | low            | 154.3        | 105.9           | 11.9         | 20.9          |
|                            |              |                |               | 85         | low            | 392.0        | 132.5           | 45.8         | 40.1          |
| ceramaster japonicus       | 0.17         | 0.80           | E. Bering S.  | 26         | low            | 113.6        | 60.2            | -33.6        | 55.7          |
|                            |              |                |               | 85         | low            | 412.7        | 119.0           | -92.0        | 14.4          |
| ceramaster patagonicus     | 0.21         | 0.83           | E. Bering S.  | 26         | low            | 122.2        | 102.2           | -34.3        | 54.1          |
|                            |              |                |               | 85         | low            | 275.3        | 131.3           | -94.1        | 16.5          |
| chaceon quinquegens        | 0.33         | 0.81           | NE U.S.       | 26         | high           | 46.2         | 46.0            | 13.1         | 22.1          |
|                            |              |                |               | 85         | medium         | 188.3        | 181.5           | -10.6        | 36.6          |
| chaetodipterus faber       | 0.40         | 0.97           | SE U.S.       | 26         | medium         | 11.7         | 8.4             | 45.3         | 37.2          |
|                            |              |                |               | 85         | low            | 31.8         | 21.4            | 329.2        | 150.4         |
|                            |              |                | G. Mexico     | 26         | high           | 21.5         | 14.1            | 53.9         | 46.5          |
|                            |              |                |               | 85         | medium         | 42.0         | 35.5            | 347.8        | 170.2         |
| chauliodus macouni         | 0.38         | 0.92           | G. Alaska     | 26         | high           | 277.4        | 215.6           | 12.4         | 26.0          |
|                            |              |                |               | 85         | high           | 992.5        | 402.7           | 167.8        | 82.7          |



| <b>Species</b>           | <b>devPA</b> | <b>devBiom</b> | <b>Region</b> | <b>RCP</b> | <b>Uncert.</b> | <b>Shift</b> | <b>sd_shift</b> | <b>%Hab.</b> | <b>sd_hab</b> |
|--------------------------|--------------|----------------|---------------|------------|----------------|--------------|-----------------|--------------|---------------|
| chauliodus sloani        | 0.64         | 0.89           | E. Canada     | 26         | medium         | 163.2        | 116.4           | 11.5         | 21.8          |
|                          |              |                |               | 85         | low            | 444.0        | 140.4           | 28.3         | 47.2          |
|                          |              |                | G. Mexico     | 26         | low            | 49.4         | 36.5            | -38.2        | 18.8          |
|                          |              |                |               | 85         | medium         | 68.6         | 47.6            | -93.2        | 3.6           |
| cheiraster dawsoni       | 0.23         | 0.18           | E. Bering S.  | 26         | low            | 112.8        | 70.5            | -2.6         | 6.4           |
|                          |              |                |               | 85         | low            | 303.1        | 137.9           | 0.4          | 19.3          |
| chiasmodon niger         | 0.59         | 0.91           | E. Canada     | 26         | medium         | 182.3        | 117.0           | 1.8          | 16.8          |
|                          |              |                |               | 85         | low            | 492.0        | 173.3           | 7.2          | 41.1          |
| chilara taylori          | 0.30         | 0.92           | West U.S.     | 26         | medium         | 192.2        | 178.0           | 20.2         | 16.2          |
|                          |              |                |               | 85         | medium         | 836.6        | 439.9           | 84.8         | 121.2         |
| chilomycterus schoepfii  | 0.38         | 0.96           | SE U.S.       | 26         | low            | 27.1         | 22.7            | -9.6         | 11.0          |
|                          |              |                |               | 85         | medium         | 382.6        | 231.5           | -14.0        | 40.4          |
|                          |              |                | G. Mexico     | 26         | medium         | 7.9          | 6.5             | -3.7         | 5.8           |
|                          |              |                |               | 85         | medium         | 24.2         | 13.3            | -27.6        | 12.0          |
| chionoecetes bairdi      | 0.47         | 0.31           | G. Alaska     | 26         | low            | 117.7        | 84.2            | 18.2         | 19.8          |
|                          |              |                |               | 85         | low            | 354.9        | 154.6           | 149.5        | 87.2          |
| chionoecetes opilio      | 0.62         | 0.93           | E. Canada     | 26         | low            | 96.4         | 77.4            | -18.0        | 30.0          |
|                          |              |                |               | 85         | low            | 323.5        | 111.9           | -45.6        | 56.5          |
|                          |              |                | E. Bering S.  | 26         | low            | 52.7         | 36.4            | -44.2        | 44.2          |
|                          |              |                |               | 85         | low            | 135.3        | 61.2            | -96.3        | 8.7           |
| chionoecetes tanneri     | 0.63         | 0.91           | G. Alaska     | 26         | medium         | 527.3        | 455.7           | 20.2         | 39.7          |
|                          |              |                |               | 85         | high           | 1833.8       | 437.9           | 187.0        | 116.4         |
| chirona evermanni        | 0.12         | 0.86           | E. Bering S.  | 26         | low            | 78.8         | 49.2            | -39.5        | 36.6          |
|                          |              |                |               | 85         | low            | 211.5        | 100.5           | -93.2        | 12.7          |
| chlamys islandica        | 0.40         | 0.87           | E. Canada     | 26         | low            | 129.7        | 65.2            | -15.5        | 34.3          |
|                          |              |                |               | 85         | medium         | 229.2        | 129.2           | -73.4        | 32.1          |
| chlamys rubida           | 0.24         | 0.84           | E. Bering S.  | 26         | low            | 102.3        | 70.5            | -14.3        | 35.3          |
|                          |              |                |               | 85         | low            | 352.4        | 100.6           | -72.6        | 44.8          |
| chlorophthalmus agassizi | 0.46         | 0.77           | NE U.S.       | 26         | low            | 183.3        | 127.2           | 34.5         | 31.5          |
|                          |              |                |               | 85         | low            | 601.3        | 246.6           | 207.5        | 106.5         |
| chloroscombrus chrysurus | 0.57         | 0.94           | SE U.S.       | 26         | medium         | 32.3         | 37.8            | 84.1         | 84.2          |
|                          |              |                |               | 85         | low            | 86.4         | 60.3            | 632.1        | 518.4         |
|                          |              |                | G. Mexico     | 26         | low            | 19.6         | 12.0            | 2.2          | 7.0           |
|                          |              |                |               | 85         | medium         | 58.5         | 24.4            | 18.8         | 15.8          |
| chrysaora melanaster     | 0.22         | 0.18           | G. Alaska     | 26         | low            | 156.7        | 144.7           | 21.3         | 19.3          |
|                          |              |                |               | 85         | low            | 656.9        | 216.9           | 74.8         | 33.2          |
| chrysaora quinquecirrha  | 0.33         | 0.87           | G. Mexico     | 26         | medium         | 66.6         | 52.6            | 87.4         | 100.2         |
|                          |              |                |               | 85         | medium         | 268.8        | 193.6           | 4.8          | 155.9         |

| <b>Species</b>            | <b>devPA</b> | <b>devBiom</b> | <b>Region</b> | <b>RCP</b> | <b>Uncert.</b> | <b>Shift</b> | <b>sd_shift</b> | <b>%Hab.</b> | <b>sd_hab</b> |
|---------------------------|--------------|----------------|---------------|------------|----------------|--------------|-----------------|--------------|---------------|
| ciliatocardium ciliatum   | 0.19         | 0.96           | E. Bering S.  | 26         | medium         | 41.8         | 26.0            | -46.9        | 48.9          |
|                           |              |                |               | 85         | medium         | 110.0        | 55.7            | -98.9        | 2.5           |
| citharichthys arctifrons  | 0.34         | 0.70           | NE U.S.       | 26         | low            | 56.4         | 47.3            | 44.1         | 43.4          |
|                           |              |                |               | 85         | medium         | 285.7        | 234.6           | 164.8        | 101.6         |
|                           |              |                | G. Mexico     | 26         | medium         | 103.3        | 97.1            | -65.0        | 24.0          |
|                           |              |                |               | 85         | high           | 151.5        | 102.2           | -99.8        | 0.2           |
| citharichthys macrops     | 0.52         | 0.96           | SE U.S.       | 26         | low            | 9.7          | 9.3             | 5.3          | 7.1           |
|                           |              |                |               | 85         | low            | 63.9         | 53.2            | 16.1         | 23.0          |
|                           |              |                | G. Mexico     | 26         | low            | 15.3         | 12.4            | -8.6         | 9.3           |
|                           |              |                |               | 85         | medium         | 47.3         | 40.4            | -36.9        | 15.2          |
| citharichthys sordidus    | 0.66         | 0.93           | West U.S.     | 26         | low            | 236.2        | 165.0           | 37.7         | 29.1          |
|                           |              |                |               | 85         | low            | 1147.4       | 276.6           | 217.3        | 76.1          |
| citharichthys spilopterus | 0.36         | 0.97           | SE U.S.       | 26         | low            | 5.8          | 3.2             | 28.1         | 21.3          |
|                           |              |                |               | 85         | medium         | 32.5         | 31.7            | 154.3        | 43.3          |
|                           |              |                | G. Mexico     | 26         | medium         | 6.6          | 3.1             | 11.5         | 7.9           |
|                           |              |                |               | 85         | medium         | 11.7         | 6.7             | 46.0         | 10.4          |
| clathrina blanca          | 0.39         | 0.96           | E. Bering S.  | 26         | high           | 160.0        | 130.6           | -33.0        | 79.6          |
|                           |              |                |               | 85         | medium         | 290.3        | 100.6           | -98.4        | 3.7           |
| clinopegma magnum         | 0.43         | 0.92           | E. Bering S.  | 26         | medium         | 35.6         | 23.6            | -31.9        | 44.9          |
|                           |              |                |               | 85         | low            | 136.9        | 60.4            | -93.9        | 10.2          |
| clupea harengus           | 0.30         | 0.82           | E. Canada     | 26         | low            | 94.3         | 64.6            | 1.7          | 17.1          |
|                           |              |                |               | 85         | low            | 380.0        | 144.0           | -12.6        | 31.0          |
| clupea pallasii           | 0.25         | 0.08           | G. Alaska     | 26         | low            | 203.1        | 183.1           | 25.1         | 22.3          |
|                           |              |                |               | 85         | low            | 784.2        | 216.8           | 118.3        | 52.6          |
| conger oceanicus          | 0.22         | 0.73           | SE U.S.       | 26         | medium         | 174.4        | 169.7           | 15.6         | 25.8          |
|                           |              |                |               | 85         | low            | 906.0        | 303.5           | 242.4        | 161.9         |
|                           |              |                | G. Mexico     | 26         | low            | 50.0         | 25.2            | -13.3        | 7.1           |
|                           |              |                |               | 85         | low            | 98.3         | 32.8            | -39.6        | 10.0          |
| coryphaenoides acrolepis  | 0.67         | 0.91           | G. Alaska     | 26         | medium         | 365.5        | 349.0           | 9.6          | 35.7          |
|                           |              |                |               | 85         | low            | 1497.0       | 495.5           | 309.5        | 214.6         |
| coryphaenoides cinereus   | 0.44         | 0.84           | E. Bering S.  | 26         | high           | 528.8        | 659.8           | 26.9         | 36.4          |
|                           |              |                |               | 85         | medium         | 2738.7       | 1198.8          | 619.6        | 706.6         |
| coryphaenoides rupestris  | 0.69         | 0.89           | E. Canada     | 26         | medium         | 152.8        | 102.7           | -1.4         | 11.8          |
|                           |              |                |               | 85         | low            | 444.6        | 166.9           | -17.6        | 37.0          |
| cottunculus microps       | 0.43         | 0.89           | E. Canada     | 26         | low            | 107.6        | 82.9            | 0.8          | 13.1          |
|                           |              |                |               | 85         | low            | 301.1        | 120.4           | -42.1        | 34.0          |
| crangon dalli             | 0.19         | 0.96           | E. Bering S.  | 26         | medium         | 51.2         | 40.1            | -35.6        | 45.9          |
|                           |              |                |               | 85         | low            | 124.3        | 47.3            | -95.4        | 7.9           |

| <b>Species</b>            | <b>devPA</b> | <b>devBiom</b> | <b>Region</b> | <b>RCP</b> | <b>Uncert.</b> | <b>Shift</b> | <b>sd_shift</b> | <b>%Hab.</b> | <b>sd_hab</b> |
|---------------------------|--------------|----------------|---------------|------------|----------------|--------------|-----------------|--------------|---------------|
| crangon septemspinosa     | 0.22         | 0.75           | NE U.S.       | 26         | medium         | 154.6        | 153.9           | -14.2        | 17.0          |
|                           |              |                |               | 85         | medium         | 760.0        | 386.3           | -56.5        | 18.0          |
| cross papposus            | 0.32         | 0.80           | E. Canada     | 26         | low            | 194.7        | 112.7           | -1.7         | 25.4          |
|                           |              |                |               | 85         | low            | 365.3        | 175.8           | -62.3        | 35.6          |
| crossaster borealis       | 0.43         | 0.15           | E. Bering S.  | 26         | low            | 50.4         | 32.3            | -16.5        | 9.9           |
|                           |              |                |               | 85         | low            | 152.1        | 57.4            | -48.5        | 8.4           |
| crossaster papposus       | 0.31         | 0.82           | E. Canada     | 26         | high           | 253.9        | 269.3           | 2.1          | 120.5         |
|                           |              |                |               | 85         | high           | 611.2        | 459.2           | -54.1        | 55.5          |
| cryptacanthodes maculatus | 0.27         | 0.78           | NE U.S.       | 26         | medium         | 204.8        | 183.4           | 5.4          | 40.6          |
|                           |              |                |               | 85         | high           | 530.4        | 364.6           | -33.4        | 110.3         |
| cryptonatica russa        | 0.27         | 0.92           | E. Bering S.  | 26         | low            | 16.1         | 9.6             | -41.5        | 35.6          |
|                           |              |                |               | 85         | low            | 60.8         | 31.9            | -96.1        | 6.6           |
| ctenodiscus crispatus     | 0.21         | 0.83           | E. Canada     | 26         | medium         | 130.1        | 118.6           | -1.9         | 14.3          |
|                           |              |                |               | 85         | low            | 620.7        | 295.6           | -29.5        | 35.4          |
| cucumaria fallax          | 0.33         | 0.43           | E. Bering S.  | 26         | high           | 48.3         | 75.0            | -44.5        | 29.9          |
|                           |              |                |               | 85         | medium         | 235.4        | 170.0           | -94.5        | 5.2           |
| cucumaria frondosa        | 0.24         | 0.94           | E. Bering S.  | 26         | low            | 95.6         | 86.5            | -23.4        | 75.9          |
|                           |              |                |               | 85         | low            | 256.8        | 78.4            | -96.4        | 7.1           |
| cucumaria frondosa        | 0.26         | 0.83           | E. Canada     | 26         | low            | 161.9        | 85.7            | 1.9          | 21.1          |
|                           |              |                |               | 85         | medium         | 504.3        | 300.4           | -34.1        | 73.3          |
| cyanea capillata          | 0.24         | 0.13           | G. Alaska     | 26         | low            | 138.4        | 120.8           | 12.2         | 12.3          |
|                           |              |                |               | 85         | medium         | 414.1        | 236.5           | 17.4         | 45.6          |
| cyclopsetta chittendeni   | 0.47         | 0.91           | G. Mexico     | 26         | medium         | 3.1          | 4.0             | 40.5         | 50.5          |
|                           |              |                |               | 85         | medium         | 6.6          | 7.1             | 19.3         | 88.8          |
| cyclopsetta fimbriata     | 0.36         | 0.97           | SE U.S.       | 26         | medium         | 55.7         | 70.2            | 307.5        | 331.1         |
|                           |              |                |               | 85         | low            | 301.0        | 141.6           | 8018.5       | 8177.8        |
|                           |              |                |               |            |                | G. Mexico    | 26              | medium       | 28.5          |
| cyclopterus lumpus        | 0.29         | 0.87           | E. Canada     | 85         | low            | 155.4        | 92.3            | -21.9        | 64.4          |
|                           |              |                |               | 26         | low            | 83.2         | 61.3            | -18.8        | 67.6          |
| cymatogaster aggregata    | 0.39         | 0.95           | West U.S.     | 85         | low            | 213.0        | 130.7           | -67.2        | 73.0          |
|                           |              |                |               | 26         | low            | 145.7        | 105.8           | 67.0         | 55.4          |
| cynoscion nothus          | 0.57         | 0.87           | SE U.S.       | 85         | low            | 754.9        | 301.3           | 474.5        | 390.3         |
|                           |              |                |               | 26         | medium         | 23.1         | 23.4            | -2.7         | 21.2          |
| cynoscion regalis         | 0.50         | 0.87           | SE U.S.       | 85         | medium         | 475.4        | 377.6           | -33.1        | 72.5          |
|                           |              |                |               | 26         | high           | 141.0        | 179.4           | -20.3        | 19.0          |
|                           |              |                |               | 85         | low            | 826.5        | 266.1           | 384.0        | 597.6         |

| <b>Species</b>             | <b>devPA</b> | <b>devBiom</b> | <b>Region</b> | <b>RCP</b> | <b>Uncert.</b> | <b>Shift</b> | <b>sd_shift</b> | <b>%Hab.</b> | <b>sd_hab</b> |
|----------------------------|--------------|----------------|---------------|------------|----------------|--------------|-----------------|--------------|---------------|
| dasyatis americana         | 0.31         | 0.98           | SE U.S.       | 26         | low            | 19.9         | 16.5            | -0.7         | 9.6           |
|                            |              |                |               | 85         | medium         | 326.5        | 221.8           | 31.0         | 53.3          |
|                            |              |                | G. Mexico     | 26         | medium         | 46.1         | 51.6            | -20.0        | 16.1          |
|                            |              |                |               | 85         | medium         | 170.5        | 113.4           | -87.9        | 14.1          |
| dasyatis centroura         | 0.32         | 0.96           | SE U.S.       | 26         | low            | 12.8         | 10.4            | 6.4          | 10.1          |
|                            |              |                |               | 85         | medium         | 347.3        | 242.8           | 2.7          | 34.8          |
|                            |              |                | G. Mexico     | 26         | medium         | 44.4         | 28.3            | -20.5        | 18.7          |
|                            |              |                |               | 85         | medium         | 132.3        | 55.3            | -85.1        | 12.5          |
| dasyatis sabina            | 0.37         | 0.98           | SE U.S.       | 26         | low            | 27.2         | 17.7            | -7.2         | 12.3          |
|                            |              |                |               | 85         | high           | 561.4        | 482.7           | 17.1         | 66.7          |
|                            |              |                | G. Mexico     | 26         | medium         | 18.5         | 17.0            | -6.5         | 8.4           |
|                            |              |                |               | 85         | medium         | 56.0         | 45.8            | -59.8        | 12.6          |
| dasyatis say               | 0.49         | 0.97           | SE U.S.       | 26         | low            | 26.0         | 20.1            | -5.0         | 8.5           |
|                            |              |                |               | 85         | medium         | 454.2        | 254.4           | -3.6         | 36.6          |
|                            |              |                | G. Mexico     | 26         | low            | 41.7         | 36.5            | -19.3        | 15.9          |
|                            |              |                |               | 85         | medium         | 122.8        | 50.6            | -84.0        | 13.2          |
| dasycottus setiger         | 0.28         | 0.13           | G. Alaska     | 26         | low            | 122.8        | 80.2            | 10.1         | 8.9           |
|                            |              |                |               | 85         | low            | 419.1        | 129.5           | 46.3         | 19.5          |
| decapterus macarellus      | 0.31         | 0.73           | SE U.S.       | 26         | medium         | 9.5          | 6.2             | 22.8         | 18.2          |
|                            |              |                |               | 85         | medium         | 33.0         | 34.3            | 222.8        | 123.5         |
|                            |              |                | G. Mexico     | 26         | high           | 21.4         | 18.7            | 35.9         | 27.0          |
|                            |              |                |               | 85         | medium         | 42.6         | 29.1            | 302.1        | 104.8         |
| decapterus punctatus       | 0.28         | 0.87           | SE U.S.       | 26         | low            | 13.6         | 13.0            | 2.0          | 9.9           |
|                            |              |                |               | 85         | low            | 150.5        | 101.5           | 14.7         | 36.6          |
|                            |              |                | G. Mexico     | 26         | high           | 15.4         | 13.2            | -20.7        | 12.3          |
|                            |              |                |               | 85         | high           | 46.5         | 32.0            | -70.5        | 11.8          |
| dichelopandalus leptocerus | 0.37         | 0.71           | NE U.S.       | 26         | low            | 30.7         | 25.0            | 25.1         | 45.9          |
|                            |              |                |               | 85         | medium         | 327.0        | 238.6           | -56.7        | 59.8          |
| diplectrum bivittatum      | 0.53         | 0.97           | SE U.S.       | 26         | high           | 46.5         | 41.4            | 98.1         | 85.7          |
|                            |              |                |               | 85         | low            | 197.6        | 124.1           | 726.6        | 932.0         |
|                            |              |                | G. Mexico     | 26         | medium         | 86.9         | 72.9            | 28.0         | 40.1          |
|                            |              |                |               | 85         | high           | 264.4        | 131.9           | -52.3        | 40.3          |
| diplectrum formosum        | 0.47         | 0.94           | SE U.S.       | 26         | medium         | 37.9         | 34.8            | 154.4        | 125.4         |
|                            |              |                |               | 85         | low            | 201.8        | 82.1            | 1902.5       | 967.6         |
|                            |              |                | G. Mexico     | 26         | low            | 29.1         | 23.5            | 34.3         | 28.8          |
|                            |              |                |               | 85         | low            | 102.1        | 40.2            | 128.0        | 62.8          |
| diplopteraster multipes    | 0.20         | 0.21           | G. Alaska     | 26         | low            | 90.1         | 63.7            | -3.2         | 7.8           |
|                            |              |                |               | 85         | medium         | 349.1        | 250.1           | 6.3          | 19.7          |

| <b>Species</b>          | <b>devPA</b> | <b>devBiom</b> | <b>Region</b> | <b>RCP</b> | <b>Uncert.</b> | <b>Shift</b> | <b>sd_shift</b> | <b>%Hab.</b> | <b>sd_hab</b> |
|-------------------------|--------------|----------------|---------------|------------|----------------|--------------|-----------------|--------------|---------------|
| dipsacaster borealis    | 0.23         | 0.77           | E. Bering S.  | 26         | low            | 132.2        | 107.9           | -24.0        | 24.1          |
|                         |              |                |               | 85         | low            | 479.4        | 122.6           | -83.7        | 18.0          |
| dipsacaster eximius     | 0.32         | 0.74           | West U.S.     | 26         | medium         | 156.4        | 171.1           | 28.1         | 42.7          |
|                         |              |                |               | 85         | medium         | 755.1        | 377.2           | 408.6        | 236.5         |
| dipturus laevis         | 0.25         | 0.89           | E. Canada     | 26         | high           | 279.2        | 428.6           | 152.8        | 502.5         |
|                         |              |                |               | 85         | high           | 875.6        | 558.7           | -86.8        | 21.4          |
| doryteuthis opalescens  | 0.45         | 0.13           | West U.S.     | 26         | low            | 164.9        | 124.1           | 40.2         | 28.8          |
|                         |              |                |               | 85         | low            | 749.9        | 189.3           | 255.1        | 139.1         |
| doryteuthis pleii       | 0.46         | 0.87           | G. Mexico     | 26         | low            | 56.8         | 39.1            | 98.7         | 96.1          |
|                         |              |                |               | 85         | medium         | 135.9        | 121.3           | 320.5        | 310.2         |
| dromalia alexandri      | 0.51         | 0.84           | West U.S.     | 26         | high           | 48.1         | 110.0           | 266.1        | 298.3         |
|                         |              |                |               | 85         | high           | 72.8         | 109.7           | 8067.6       | 20773.6       |
| duva florida            | 0.34         | 0.80           | E. Canada     | 26         | low            | 110.1        | 52.4            | -20.1        | 23.3          |
|                         |              |                |               | 85         | low            | 258.3        | 155.8           | -62.5        | 35.8          |
| echeneis naucrates      | 0.26         | 0.98           | SE U.S.       | 26         | medium         | 12.6         | 10.8            | 15.2         | 23.1          |
|                         |              |                |               | 85         | medium         | 115.3        | 89.9            | 18.7         | 14.3          |
|                         |              |                | G. Mexico     | 26         | medium         | 18.5         | 17.3            | 5.1          | 11.8          |
|                         |              |                |               | 85         | medium         | 105.3        | 83.0            | -55.4        | 23.6          |
| echinarachnius parma    | 0.32         | 0.82           | E. Canada     | 26         | medium         | 185.3        | 177.2           | -15.2        | 79.4          |
|                         |              |                |               | 85         | medium         | 832.9        | 399.4           | -77.8        | 23.2          |
|                         | 0.16         | 0.89           | E. Bering S.  | 26         | medium         | 69.5         | 56.4            | -37.9        | 59.3          |
|                         |              |                |               | 85         | low            | 139.1        | 68.6            | -98.5        | 2.9           |
| elassochirus cavimanus  | 0.21         | 0.91           | E. Bering S.  | 26         | low            | 60.0         | 41.7            | -44.6        | 48.9          |
|                         |              |                |               | 85         | low            | 150.2        | 63.3            | -98.3        | 3.9           |
| elassochirus tenuimanus | 0.27         | 0.90           | E. Bering S.  | 26         | medium         | 180.9        | 131.7           | 0.3          | 78.6          |
|                         |              |                |               | 85         | low            | 399.5        | 116.9           | -65.2        | 57.6          |
| eleginus gracilis       | 0.53         | 0.96           | E. Bering S.  | 26         | low            | 28.0         | 26.5            | 10.7         | 41.7          |
|                         |              |                |               | 85         | high           | 353.5        | 1106.8          | -17.0        | 108.7         |
| embassichthys bathybius | 0.70         | 0.96           | G. Alaska     | 26         | high           | 311.4        | 275.7           | -7.5         | 15.2          |
|                         |              |                |               | 85         | medium         | 1343.0       | 367.1           | 83.6         | 69.7          |
| enchelyopus cimbricus   | 0.29         | 0.83           | E. Canada     | 26         | low            | 85.7         | 48.6            | 8.4          | 18.4          |
|                         |              |                |               | 85         | low            | 304.2        | 89.2            | 11.5         | 26.4          |
| engraulis eurystole     | 0.21         | 0.80           | NE U.S.       | 26         | medium         | 172.0        | 197.5           | 160.1        | 444.7         |
|                         |              |                |               | 85         | high           | 544.1        | 605.2           | 3270.0       | 3332.8        |
|                         |              |                | G. Mexico     | 26         | medium         | 112.3        | 90.9            | -69.4        | 26.7          |
|                         |              |                |               | 85         | high           | 246.8        | 163.3           | -98.1        | 3.2           |
| engraulis mordax        | 0.33         | 0.89           | West U.S.     | 26         | low            | 236.5        | 123.8           | 35.0         | 21.0          |
|                         |              |                |               | 85         | low            | 1221.3       | 410.1           | 138.4        | 90.7          |

| <b>Species</b>        | <b>devPA</b> | <b>devBiom</b> | <b>Region</b> | <b>RCP</b> | <b>Uncert.</b> | <b>Shift</b> | <b>sd_shift</b> | <b>%Hab.</b> | <b>sd_hab</b> |
|-----------------------|--------------|----------------|---------------|------------|----------------|--------------|-----------------|--------------|---------------|
| engyophrys senta      | 0.33         | 0.90           | G. Mexico     | 26         | low            | 44.4         | 42.6            | 3.8          | 25.1          |
|                       |              |                |               | 85         | medium         | 135.6        | 109.3           | -59.7        | 34.4          |
| eopsetta jordani      | 0.61         | 0.95           | G. Alaska     | 26         | low            | 347.1        | 260.1           | 20.9         | 16.7          |
|                       |              |                |               | 85         | low            | 1333.3       | 233.6           | 101.2        | 68.1          |
| eptatretus deani      | 0.38         | 0.92           | West U.S.     | 26         | medium         | 180.3        | 136.1           | 12.8         | 23.7          |
|                       |              |                |               | 85         | medium         | 751.7        | 322.4           | 103.5        | 63.0          |
| eptatretus stoutii    | 0.26         | 0.86           | G. Alaska     | 26         | medium         | 300.2        | 230.9           | 19.7         | 42.1          |
|                       |              |                |               | 85         | medium         | 1383.4       | 389.7           | 68.0         | 69.1          |
| equetus lanceolatus   | 0.54         | 0.96           | SE U.S.       | 26         | high           | 89.1         | 116.3           | 321.5        | 389.9         |
|                       |              |                |               | 85         | low            | 414.0        | 210.7           | 11854.3      | 14511.5       |
|                       |              |                | G. Mexico     | 26         | medium         | 30.1         | 33.0            | 36.7         | 46.3          |
| erimacrus isenbeckii  | 0.35         | 0.97           | E. Bering S.  | 85         | low            | 141.3        | 81.8            | 15.9         | 90.7          |
|                       |              |                |               | 26         | medium         | 104.1        | 70.3            | -35.1        | 72.8          |
|                       |              |                | 85            | low        | 192.3          | 116.7        | -99.0           | 2.3          |               |
| etropus crossotus     | 0.46         | 0.97           | SE U.S.       | 26         | low            | 11.9         | 8.7             | 16.6         | 17.6          |
|                       |              |                |               | 85         | low            | 76.4         | 48.8            | 36.8         | 28.5          |
|                       |              |                | G. Mexico     | 26         | low            | 17.6         | 13.2            | -5.8         | 6.8           |
| etropus cyclosquamus  | 0.34         | 0.95           | SE U.S.       | 85         | high           | 40.6         | 31.3            | -54.1        | 14.7          |
|                       |              |                |               | 26         | medium         | 16.0         | 10.7            | 14.5         | 20.1          |
|                       |              |                | G. Mexico     | 85         | low            | 82.5         | 62.1            | 1.6          | 28.4          |
| etropus microstomus   | 0.30         | 0.81           | SE U.S.       | 26         | medium         | 20.6         | 19.3            | -8.3         | 9.1           |
|                       |              |                |               | 85         | medium         | 53.3         | 44.4            | -59.6        | 11.8          |
|                       |              |                | G. Mexico     | 26         | high           | 92.0         | 123.7           | 19.2         | 44.1          |
| etrumeus teres        | 0.27         | 0.80           | SE U.S.       | 85         | low            | 509.0        | 202.0           | 255.4        | 170.1         |
|                       |              |                |               | 26         | medium         | 13.2         | 9.6             | -12.9        | 8.0           |
|                       |              |                | G. Mexico     | 85         | medium         | 30.9         | 20.0            | -22.8        | 16.0          |
| eualus fabricii       | 0.38         | 0.84           | SE U.S.       | 26         | low            | 160.9        | 142.1           | 20.6         | 83.7          |
|                       |              |                |               | 85         | low            | 655.0        | 273.5           | 298.5        | 268.3         |
|                       |              |                | G. Mexico     | 26         | low            | 38.1         | 31.3            | -39.3        | 18.5          |
| eualus gaimardii      | 0.51         | 0.86           | E. Canada     | 85         | low            | 76.4         | 32.4            | -90.6        | 4.4           |
|                       |              |                |               | 26         | low            | 84.6         | 64.7            | -26.3        | 28.5          |
|                       |              |                | 85            | medium     | 189.1          | 95.7         | -79.2           | 24.7         |               |
| eualus macilentus     | 0.57         | 0.89           | E. Canada     | 26         | low            | 80.2         | 68.6            | -29.1        | 29.5          |
|                       |              |                |               | 85         | medium         | 184.7        | 89.8            | -81.6        | 22.5          |
| eualus macrophthalmus | 0.34         | 0.91           | G. Alaska     | 26         | low            | 115.7        | 85.1            | -29.7        | 33.1          |
|                       |              |                |               | 85         | low            | 280.9        | 147.4           | -77.3        | 31.1          |
|                       |              |                |               | 26         | low            | 250.0        | 204.0           | -1.2         | 12.5          |
|                       |              |                |               | 85         | high           | 1027.3       | 414.8           | 8.0          | 31.0          |

| <b>Species</b>          | <b>devPA</b> | <b>devBiom</b> | <b>Region</b>            | <b>RCP</b>              | <b>Uncert.</b> | <b>Shift</b> | <b>sd_shift</b> | <b>%Hab.</b> | <b>sd_hab</b> |
|-------------------------|--------------|----------------|--------------------------|-------------------------|----------------|--------------|-----------------|--------------|---------------|
| eucinostomus argenteus  | 0.27         | 0.86           | SE U.S.                  | 26                      | high           | 4.3          | 7.2             | 1398.8       | 2458.5        |
|                         |              |                |                          | 85                      | medium         | 153.4        | 145.5           | 32183.4      | 52135.5       |
|                         |              |                | G. Mexico                | 26                      | medium         | 42.2         | 33.6            | 146.4        | 146.2         |
|                         |              |                |                          | 85                      | low            | 194.5        | 106.4           | 301.4        | 476.7         |
| eucinostomus gula       | 0.39         | 0.86           | SE U.S.                  | 26                      | high           | 8.9          | 17.4            | 754.7        | 810.3         |
|                         |              |                |                          | 85                      | low            | 40.9         | 27.2            | 13753.8      | 14891.1       |
|                         |              |                | G. Mexico                | 26                      | low            | 28.3         | 18.0            | 288.6        | 305.3         |
|                         |              |                |                          | 85                      | medium         | 59.2         | 36.9            | 3470.9       | 2738.8        |
| eumesogrammus praecisus | 0.46         | 0.90           | E. Canada                | 26                      | low            | 159.6        | 127.6           | -30.8        | 27.9          |
|                         |              |                |                          | 85                      | low            | 444.8        | 196.4           | -69.1        | 40.8          |
|                         |              |                |                          | eumicrotremus orbis     | 0.25           | 0.91         | E. Bering S.    | 26           | low           |
|                         |              |                |                          | 85                      | low            | 193.6        | 77.6            | -91.8        | 14.2          |
|                         |              |                |                          | eumicrotremus spinosus  | 0.45           | 0.86         | E. Canada       | 26           | low           |
|                         |              |                |                          | 85                      | low            | 205.3        | 110.4           | -79.1        | 25.5          |
|                         |              |                |                          | eunoe depressa          | 0.21           | 0.94         | E. Bering S.    | 26           | low           |
|                         |              |                |                          | 85                      | low            | 143.9        | 69.6            | -97.1        | 6.0           |
|                         |              |                |                          | eunoe nodosa            | 0.28           | 0.94         | E. Bering S.    | 26           | low           |
|                         |              |                |                          | 85                      | low            | 159.5        | 66.8            | -96.6        | 7.5           |
|                         |              |                |                          | euspira pallida         | 0.29           | 0.91         | E. Bering S.    | 26           | low           |
|                         |              |                |                          | 85                      | medium         | 117.5        | 52.3            | -95.7        | 6.1           |
|                         |              |                |                          | evasterias echinosoma   | 0.36           | 0.96         | E. Bering S.    | 26           | medium        |
|                         |              |                |                          | 85                      | low            | 284.9        | 125.9           | -98.9        | 2.5           |
|                         |              |                |                          | fanellia compressa      | 0.33           | 0.88         | E. Bering S.    | 26           | medium        |
|                         |              |                |                          | 85                      | medium         | 367.9        | 176.1           | -99.9        | 0.3           |
|                         |              |                |                          | farfantepenaeus aztecus | 0.70           | 0.95         | SE U.S.         | 26           | low           |
|                         |              |                |                          | 85                      | medium         | 175.6        | 142.5           | -19.8        | 16.0          |
|                         |              |                |                          | G. Mexico               | 26             | medium       | 20.2            | 20.1         | -3.4          |
|                         |              |                | 85                       |                         | low            | 33.3         | 25.3            | 0.7          | 11.0          |
|                         |              |                | farfantepenaeus duorarum | 0.40                    | 0.97           | SE U.S.      | 26              | medium       | 19.1          |
|                         |              |                |                          | 85                      | low            | 164.0        | 104.6           | -57.2        | 19.7          |
|                         |              |                |                          | G. Mexico               | 26             | medium       | 26.5            | 18.9         | -12.1         |
|                         |              |                | 85                       |                         | medium         | 53.1         | 30.4            | -68.4        | 9.3           |
|                         |              |                | fowlerichthys radiosus   | 0.40                    | 0.97           | SE U.S.      | 26              | low          | 21.5          |
|                         |              |                |                          | 85                      | high           | 98.2         | 157.5           | 245.8        | 100.6         |
|                         |              |                |                          | G. Mexico               | 26             | medium       | 6.4             | 4.9          | 4.1           |
|                         |              |                | 85                       |                         | high           | 14.8         | 8.2             | 36.7         | 13.2          |
|                         |              |                | fusitriton oregonensis   | 0.28                    | 0.39           | G. Alaska    | 26              | low          | 123.9         |
|                         |              |                |                          | 85                      | low            | 400.9        | 127.7           | 10.6         | 11.4          |

| <b>Species</b>             | <b>devPA</b> | <b>devBiom</b> | <b>Region</b> | <b>RCP</b> | <b>Uncert.</b> | <b>Shift</b> | <b>sd_shift</b> | <b>%Hab.</b> | <b>sd_hab</b> |
|----------------------------|--------------|----------------|---------------|------------|----------------|--------------|-----------------|--------------|---------------|
| gadus macrocephalus        | 0.49         | 0.14           | E. Bering S.  | 26         | low            | 44.9         | 28.6            | -8.1         | 7.0           |
|                            |              |                |               | 85         | low            | 116.5        | 54.7            | -47.6        | 15.0          |
| gadus morhua               | 0.45         | 0.89           | E. Canada     | 26         | low            | 111.6        | 67.8            | -1.7         | 9.5           |
|                            |              |                |               | 85         | medium         | 428.2        | 213.5           | -34.0        | 18.1          |
| gadus ogac                 | 0.48         | 0.94           | E. Canada     | 26         | medium         | 129.0        | 128.7           | -36.9        | 24.2          |
|                            |              |                |               | 85         | medium         | 556.1        | 253.2           | -65.7        | 53.0          |
| genyonemus lineatus        | 0.54         | 0.92           | West U.S.     | 26         | medium         | 66.7         | 47.7            | 126.1        | 142.7         |
|                            |              |                |               | 85         | medium         | 392.1        | 276.7           | 1341.8       | 1895.5        |
| gersemia rubiformis        | 0.27         | 0.85           | E. Canada     | 26         | low            | 126.3        | 75.4            | -13.3        | 21.6          |
|                            |              |                |               | 85         | low            | 333.5        | 118.8           | -57.5        | 40.9          |
| gibbesia neglecta          | 0.32         | 0.93           | E. Bering S.  | 26         | low            | 42.4         | 38.2            | -13.3        | 24.4          |
|                            |              |                |               | 85         | high           | 205.4        | 227.0           | -70.2        | 18.9          |
|                            |              |                | SE U.S.       | 26         | low            | 15.2         | 10.9            | 87.7         | 87.5          |
|                            |              |                |               | 85         | low            | 42.6         | 15.9            | 589.7        | 448.8         |
| G. Mexico                  | 0.44         | 0.94           | 26            | medium     | 17.0           | 9.5          | 28.8            | 19.1         |               |
|                            |              |                | 85            | high       | 52.2           | 27.1         | 150.9           | 60.7         |               |
|                            |              |                | 26            | low        | 150.4          | 99.8         | 2.0             | 89.6         |               |
| glebocarcinus oregonensis  | 0.29         | 0.93           | E. Bering S.  | 85         | low            | 333.5        | 90.9            | -86.0        | 22.3          |
|                            |              |                |               | 26         | low            | 117.5        | 63.8            | 10.7         | 10.8          |
| glyptocephalus cynoglossus | 0.39         | 0.87           | E. Canada     | 85         | low            | 398.6        | 183.0           | 9.0          | 22.4          |
|                            |              |                |               | 26         | low            | 188.8        | 114.7           | 9.7          | 6.7           |
| glyptocephalus zachirus    | 0.37         | 0.15           | G. Alaska     | 85         | low            | 654.5        | 93.9            | 15.3         | 18.8          |
|                            |              |                |               | 26         | low            | 347.0        | 255.9           | 14.2         | 18.4          |
| gonatus onyx               | 0.30         | 0.95           | G. Alaska     | 85         | low            | 1120.0       | 275.0           | 51.1         | 36.6          |
|                            |              |                |               | 26         | low            | 384.6        | 239.8           | 12.0         | 17.9          |
| gorgonocephalus eucnemis   | 0.22         | 0.43           | G. Alaska     | 85         | low            | 998.0        | 320.3           | 138.3        | 128.2         |
|                            |              |                |               | 26         | low            | 2.3          | 1.6             | -18.4        | 32.6          |
| gymnachirus texae          | 0.35         | 0.90           | G. Mexico     | 85         | low            | 7.2          | 5.0             | -93.5        | 7.8           |
|                            |              |                |               | 26         | low            | 95.4         | 74.2            | -25.8        | 27.2          |
| gymnelus viridis           | 0.35         | 0.84           | E. Canada     | 85         | low            | 242.7        | 142.9           | -75.3        | 28.0          |
|                            |              |                |               | 26         | low            | 107.2        | 80.6            | -39.3        | 43.2          |
| gymnocanthus galeatus      | 0.22         | 0.96           | E. Bering S.  | 85         | low            | 305.0        | 84.6            | -95.0        | 9.8           |
|                            |              |                |               | 26         | high           | 88.5         | 62.9            | -2.3         | 124.6         |
| gymnocanthus pistilliger   | 0.49         | 0.96           | E. Bering S.  | 85         | high           | 214.5        | 95.1            | -99.0        | 2.2           |
|                            |              |                |               | 26         | high           | 22.8         | 36.3            | 875.0        | 1409.1        |
| gymnothorax saxicola       | 0.37         | 0.88           | SE U.S.       | 85         | medium         | 252.4        | 171.0           | 21903.1      | 30057.6       |
|                            |              |                |               | 26         | low            | 34.7         | 31.7            | 102.2        | 95.5          |
|                            |              |                | G. Mexico     | 85         | low            | 101.6        | 57.2            | 723.2        | 455.0         |



| Species                   | devPA | devBiom | Region       | RCP | Uncert. | Shift | sd_shift | %Hab.  | sd_hab |
|---------------------------|-------|---------|--------------|-----|---------|-------|----------|--------|--------|
| gymnura altavela          | 0.45  | 0.96    | SE U.S.      | 26  | medium  | 27.4  | 28.3     | -6.4   | 15.7   |
|                           |       |         |              | 85  | low     | 503.1 | 255.2    | -52.6  | 23.3   |
|                           |       |         | G. Mexico    | 26  | medium  | 72.0  | 56.9     | -44.9  | 24.8   |
|                           |       |         |              | 85  | high    | 168.1 | 133.9    | -98.3  | 3.0    |
| gymnura micrura           | 0.55  | 0.97    | SE U.S.      | 26  | low     | 20.7  | 14.6     | 3.3    | 7.5    |
|                           |       |         |              | 85  | medium  | 284.9 | 194.2    | 28.5   | 44.9   |
|                           |       |         | G. Mexico    | 26  | low     | 26.6  | 22.7     | -9.6   | 9.8    |
|                           |       |         |              | 85  | medium  | 64.5  | 38.1     | -64.3  | 12.6   |
| gymothorax igromargiatus  | 0.24  | 0.89    | SE U.S.      | 26  | low     | 52.3  | 39.6     | 66.9   | 36.7   |
|                           |       |         |              | 85  | low     | 257.7 | 108.5    | 282.4  | 139.6  |
|                           |       |         | G. Mexico    | 26  | medium  | 21.8  | 23.2     | 10.5   | 12.2   |
|                           |       |         |              | 85  | low     | 65.4  | 39.8     | -10.3  | 29.7   |
| haemulon aurolineatum     | 0.42  | 0.93    | SE U.S.      | 26  | medium  | 68.7  | 73.9     | 254.7  | 270.3  |
|                           |       |         |              | 85  | low     | 319.7 | 153.0    | 8641.7 | 7551.5 |
|                           |       |         | G. Mexico    | 26  | medium  | 17.6  | 15.6     | 59.3   | 51.4   |
|                           |       |         |              | 85  | low     | 57.3  | 22.4     | 366.5  | 174.3  |
| haemulon plumierii        | 0.47  | 0.96    | SE U.S.      | 26  | medium  | 81.8  | 95.7     | 380.2  | 500.4  |
|                           |       |         |              | 85  | low     | 365.7 | 184.3    | 9806.2 | 9282.3 |
|                           |       |         | G. Mexico    | 26  | medium  | 19.3  | 20.1     | 66.1   | 67.7   |
|                           |       |         |              | 85  | medium  | 39.6  | 32.9     | 208.2  | 207.4  |
| halichondria panicea      | 0.15  | 0.83    | E. Bering S. | 26  | medium  | 108.0 | 109.1    | -29.9  | 30.4   |
|                           |       |         |              | 85  | high    | 209.1 | 250.4    | -93.1  | 9.6    |
| halichondria sitiens      | 0.39  | 0.90    | E. Bering S. | 26  | medium  | 244.6 | 140.8    | 33.1   | 371.0  |
|                           |       |         |              | 85  | medium  | 453.8 | 213.6    | -99.9  | 0.2    |
| halieutichthys aculeatus  | 0.49  | 0.95    | SE U.S.      | 26  | medium  | 20.4  | 14.2     | 105.2  | 81.7   |
|                           |       |         |              | 85  | medium  | 55.7  | 20.5     | 436.0  | 361.3  |
|                           |       |         | G. Mexico    | 26  | medium  | 33.9  | 33.0     | -5.4   | 9.2    |
|                           |       |         |              | 85  | low     | 112.3 | 63.8     | -50.2  | 19.8   |
| halocynthia aurantium     | 0.22  | 0.94    | E. Bering S. | 26  | low     | 95.3  | 86.4     | -44.3  | 40.9   |
|                           |       |         |              | 85  | low     | 225.4 | 79.4     | -92.6  | 17.8   |
| harengula jaguana         | 0.39  | 0.97    | SE U.S.      | 26  | medium  | 57.8  | 63.6     | 144.6  | 142.1  |
|                           |       |         |              | 85  | low     | 130.8 | 74.4     | 1571.9 | 1280.3 |
|                           |       |         | G. Mexico    | 26  | medium  | 24.9  | 24.2     | 36.1   | 31.5   |
|                           |       |         |              | 85  | medium  | 64.1  | 43.6     | 164.5  | 116.0  |
| helicolenus dactylopterus | 0.43  | 0.68    | NE U.S.      | 26  | low     | 186.3 | 148.6    | 34.5   | 32.5   |
|                           |       |         |              | 85  | low     | 714.1 | 233.8    | 111.8  | 93.8   |
|                           |       |         | G. Mexico    | 26  | medium  | 72.7  | 52.5     | -48.4  | 15.9   |
|                           |       |         |              | 85  | high    | 98.5  | 47.7     | -84.9  | 8.7    |

| <b>Species</b>               | <b>devPA</b> | <b>devBiom</b> | <b>Region</b> | <b>RCP</b> | <b>Uncert.</b> | <b>Shift</b> | <b>sd_shift</b> | <b>%Hab.</b> | <b>sd_hab</b> |
|------------------------------|--------------|----------------|---------------|------------|----------------|--------------|-----------------|--------------|---------------|
| hemicar anx amblyrhynchus    | 0.34         | 0.96           | SE U.S.       | 26         | medium         | 11.7         | 9.3             | 29.0         | 21.9          |
|                              |              |                |               | 85         | high           | 53.3         | 66.1            | 246.6        | 131.7         |
|                              |              |                | G. Mexico     | 26         | medium         | 30.2         | 16.3            | 29.6         | 23.7          |
|                              |              |                |               | 85         | medium         | 73.7         | 55.2            | 264.5        | 137.5         |
| hemilepidotus jordani        | 0.29         | 0.92           | E. Bering S.  | 26         | low            | 65.0         | 46.4            | -35.0        | 53.4          |
|                              |              |                |               | 85         | low            | 180.1        | 53.1            | -97.0        | 5.3           |
| hemilepidotus papilio        | 0.51         | 0.96           | E. Bering S.  | 26         | low            | 24.2         | 11.1            | -46.8        | 48.3          |
|                              |              |                |               | 85         | low            | 95.8         | 50.1            | -98.5        | 3.2           |
| hemitripter us americanus    | 0.32         | 0.89           | E. Canada     | 26         | low            | 107.2        | 70.4            | -4.4         | 7.7           |
|                              |              |                |               | 85         | low            | 445.0        | 165.3           | -41.3        | 13.8          |
| hemitripter us bolini        | 0.24         | 0.88           | E. Bering S.  | 26         | low            | 52.9         | 34.5            | -27.5        | 40.2          |
|                              |              |                |               | 85         | low            | 142.1        | 35.5            | -93.1        | 11.5          |
| henricia leviuscula          | 0.14         | 0.80           | E. Bering S.  | 26         | high           | 91.9         | 185.0           | -29.0        | 43.4          |
|                              |              |                |               | 85         | high           | 2676.4       | 2288.4          | 758.2        | 2263.6        |
| hepatus epheliticus          | 0.32         | 0.97           | SE U.S.       | 26         | high           | 28.5         | 40.7            | -4.6         | 8.1           |
|                              |              |                |               | 85         | high           | 183.5        | 212.7           | 3.9          | 25.9          |
|                              |              |                | G. Mexico     | 26         | medium         | 23.9         | 28.0            | -7.2         | 12.5          |
|                              |              |                |               | 85         | medium         | 79.1         | 64.8            | -7.5         | 30.9          |
| heterozonias alternatus      | 0.61         | 0.95           | G. Alaska     | 26         | high           | 298.9        | 289.5           | -4.8         | 13.4          |
|                              |              |                |               | 85         | high           | 1388.8       | 273.8           | 32.2         | 37.3          |
| hexagrammos decagrammus      | 0.18         | 0.12           | E. Bering S.  | 26         | low            | 27.4         | 16.0            | 1.9          | 6.1           |
|                              |              |                |               | 85         | low            | 100.6        | 43.0            | 6.8          | 9.7           |
| hexagrammos stelleri         | 0.40         | 0.91           | E. Bering S.  | 26         | high           | 72.5         | 56.0            | 2.2          | 49.5          |
|                              |              |                |               | 85         | medium         | 135.2        | 77.2            | -73.2        | 39.8          |
| hippasteria californica      | 0.40         | 0.93           | G. Alaska     | 26         | low            | 385.8        | 324.3           | 16.4         | 22.6          |
|                              |              |                |               | 85         | low            | 1394.1       | 291.5           | 104.7        | 49.9          |
| hippocampus erectus          | 0.23         | 0.96           | SE U.S.       | 26         | low            | 7.5          | 5.8             | 55.3         | 42.8          |
|                              |              |                |               | 85         | medium         | 18.6         | 13.9            | 609.9        | 260.8         |
|                              |              |                | G. Mexico     | 26         | low            | 8.6          | 6.7             | 38.2         | 32.0          |
|                              |              |                |               | 85         | low            | 17.7         | 9.4             | 432.0        | 186.8         |
| hippoglossina oblonga        | 0.42         | 0.81           | NE U.S.       | 26         | low            | 50.2         | 39.4            | 27.3         | 27.7          |
|                              |              |                |               | 85         | medium         | 307.6        | 271.9           | 69.5         | 50.2          |
| hippoglossoides elassodon    | 0.34         | 0.71           | G. Alaska     | 26         | medium         | 166.6        | 154.8           | 16.0         | 33.4          |
|                              |              |                |               | 85         | low            | 708.2        | 352.4           | 12.8         | 46.0          |
| hippoglossoides platessoides | 0.60         | 0.84           | E. Canada     | 26         | low            | 88.3         | 57.4            | -4.3         | 13.8          |
|                              |              |                |               | 85         | medium         | 334.4        | 182.8           | -23.0        | 29.9          |
| hippoglossus hippoglossus    | 0.29         | 0.94           | E. Canada     | 26         | low            | 122.1        | 69.3            | 5.5          | 11.6          |
|                              |              |                |               | 85         | medium         | 440.9        | 262.1           | -18.6        | 27.3          |

| <b>Species</b>            | <b>devPA</b> | <b>devBiom</b> | <b>Region</b> | <b>RCP</b> | <b>Uncert.</b> | <b>Shift</b> | <b>sd_shift</b> | <b>%Hab.</b> | <b>sd_hab</b> |
|---------------------------|--------------|----------------|---------------|------------|----------------|--------------|-----------------|--------------|---------------|
| hippoglossus stenolepis   | 0.33         | 0.28           | E. Bering S.  | 26         | low            | 81.0         | 50.8            | 7.3          | 5.4           |
|                           |              |                |               | 85         | low            | 277.1        | 57.9            | 8.8          | 12.2          |
| histioteuthis heteropsis  | 0.30         | 0.87           | West U.S.     | 26         | medium         | 217.0        | 205.5           | 8.9          | 14.6          |
|                           |              |                |               | 85         | low            | 1161.6       | 388.3           | 50.6         | 38.7          |
| homarus americanus        | 0.30         | 0.83           | NE U.S.       | 26         | low            | 60.4         | 45.0            | 7.9          | 23.3          |
|                           |              |                |               | 85         | medium         | 310.0        | 222.5           | 3.4          | 42.4          |
| homaxinella amphispicula  | 0.37         | 0.96           | E. Bering S.  | 26         | high           | 105.1        | 132.1           | -44.4        | 48.3          |
|                           |              |                |               | 85         | medium         | 168.5        | 106.3           | -97.9        | 4.4           |
| hoplunnis macrura         | 0.34         | 0.89           | G. Mexico     | 26         | low            | 0.5          | 0.4             | 1.0          | 36.3          |
|                           |              |                |               | 85         | low            | 1.5          | 1.7             | -75.3        | 24.4          |
| hyas araneus              | 0.37         | 0.82           | E. Canada     | 26         | high           | 305.3        | 302.4           | 272.8        | 800.3         |
|                           |              |                |               | 85         | high           | 528.9        | 405.2           | -60.0        | 47.3          |
| hyas coarctatus           | 0.39         | 0.82           | E. Canada     | 26         | medium         | 282.7        | 269.0           | 235.1        | 706.4         |
|                           |              |                |               | 85         | high           | 596.3        | 431.6           | -48.6        | 68.1          |
| hyas lyratus              | 0.54         | 0.95           | E. Bering S.  | 26         | medium         | 77.9         | 52.2            | -36.6        | 65.5          |
|                           |              |                |               | 85         | low            | 163.1        | 80.7            | -98.6        | 3.0           |
| hyas lyratus              | 0.24         | 0.21           | E. Bering S.  | 26         | low            | 57.4         | 35.8            | 6.7          | 7.9           |
|                           |              |                |               | 85         | medium         | 145.3        | 89.1            | 32.6         | 18.0          |
| hydrolagus colliei        | 0.53         | 0.96           | G. Alaska     | 26         | low            | 290.7        | 191.0           | 24.3         | 19.9          |
|                           |              |                |               | 85         | low            | 1239.3       | 286.1           | 128.2        | 90.1          |
| icelinus filamentosus     | 0.34         | 0.97           | G. Alaska     | 26         | low            | 284.2        | 195.4           | 20.8         | 27.8          |
|                           |              |                |               | 85         | low            | 1304.2       | 360.9           | 88.0         | 59.7          |
| icelus spatula            | 0.56         | 0.91           | E. Canada     | 26         | low            | 116.4        | 78.4            | -34.2        | 36.7          |
|                           |              |                |               | 85         | medium         | 245.1        | 112.4           | -79.7        | 34.8          |
| icelus spiniger           | 0.26         | 0.96           | E. Bering S.  | 26         | medium         | 70.1         | 56.9            | -37.3        | 68.7          |
|                           |              |                |               | 85         | medium         | 116.2        | 73.3            | -98.8        | 2.5           |
| icelus spiniger           | 0.46         | 0.94           | E. Bering S.  | 26         | medium         | 59.2         | 51.5            | -40.7        | 46.9          |
|                           |              |                |               | 85         | low            | 131.5        | 33.7            | -95.5        | 11.1          |
| illex illecebrosus        | 0.37         | 0.72           | NE U.S.       | 26         | low            | 73.3         | 42.0            | 42.8         | 39.6          |
|                           |              |                |               | 85         | medium         | 286.7        | 192.7           | 224.8        | 87.0          |
| isopsetta isolepis        | 0.30         | 0.18           | G. Alaska     | 26         | low            | 261.9        | 202.1           | 48.7         | 52.6          |
|                           |              |                |               | 85         | low            | 796.4        | 250.2           | 356.7        | 208.2         |
| kathetostoma albigutta    | 0.44         | 0.91           | SE U.S.       | 26         | medium         | 70.9         | 76.6            | 192.6        | 145.8         |
|                           |              |                |               | 85         | low            | 296.3        | 126.9           | 1308.7       | 1241.7        |
|                           |              |                | G. Mexico     | 26         | medium         | 52.7         | 38.8            | 27.2         | 36.4          |
| labidochirus splendescens | 0.35         | 0.94           | E. Bering S.  | 85         | medium         | 80.1         | 79.3            | 15.5         | 118.8         |
|                           |              |                |               | 26         | medium         | 60.2         | 35.3            | -35.4        | 53.5          |
|                           |              |                | 85            | low        | 147.9          | 47.7         | -96.1           | 7.3          |               |

| <b>Species</b>          | <b>devPA</b> | <b>devBiom</b> | <b>Region</b> | <b>RCP</b> | <b>Uncert.</b> | <b>Shift</b> | <b>sd_shift</b> | <b>%Hab.</b> | <b>sd_hab</b> |
|-------------------------|--------------|----------------|---------------|------------|----------------|--------------|-----------------|--------------|---------------|
| lagocephalus laevigatus | 0.38         | 0.96           | SE U.S.       | 26         | low            | 11.8         | 8.4             | 19.6         | 18.9          |
|                         |              |                |               | 85         | low            | 51.0         | 25.2            | 76.6         | 34.9          |
|                         |              |                | G. Mexico     | 26         | low            | 12.9         | 8.9             | 10.2         | 9.3           |
|                         |              |                |               | 85         | medium         | 33.8         | 16.9            | 60.3         | 29.0          |
| lagodon rhomboides      | 0.44         | 0.95           | SE U.S.       | 26         | medium         | 17.3         | 21.3            | -0.9         | 16.8          |
|                         |              |                |               | 85         | medium         | 219.6        | 181.1           | -37.4        | 13.1          |
|                         |              |                | G. Mexico     | 26         | medium         | 22.7         | 28.3            | 3.3          | 9.8           |
|                         |              |                |               | 85         | medium         | 54.9         | 53.3            | 55.1         | 34.0          |
| laqueus californianus   | 0.24         | 0.74           | E. Bering S.  | 26         | low            | 54.3         | 43.2            | -14.8        | 59.4          |
|                         |              |                |               | 85         | low            | 177.7        | 69.1            | -83.1        | 34.9          |
| larimus fasciatus       | 0.45         | 0.95           | SE U.S.       | 26         | low            | 22.1         | 15.2            | -10.6        | 12.3          |
|                         |              |                |               | 85         | medium         | 265.5        | 226.6           | -1.5         | 43.1          |
|                         |              |                | G. Mexico     | 26         | low            | 36.9         | 21.3            | 8.0          | 11.0          |
|                         |              |                |               | 85         | low            | 76.6         | 27.1            | 65.8         | 43.3          |
| lebbeus groenlandicus   | 0.39         | 0.85           | E. Canada     | 26         | medium         | 125.3        | 93.0            | -24.4        | 20.1          |
|                         |              |                |               | 85         | medium         | 231.2        | 155.6           | -76.2        | 25.9          |
| lebbeus polaris         | 0.47         | 0.85           | E. Canada     | 26         | low            | 153.9        | 95.9            | -13.0        | 21.0          |
|                         |              |                |               | 85         | low            | 318.5        | 133.9           | -66.8        | 30.8          |
| leiolambrus nitidus     | 0.31         | 0.92           | G. Mexico     | 26         | medium         | 47.4         | 42.8            | 100.8        | 127.8         |
|                         |              |                |               | 85         | low            | 176.0        | 114.1           | 299.8        | 353.9         |
| leiostomus xanthurus    | 0.48         | 0.94           | SE U.S.       | 26         | low            | 22.0         | 18.1            | -6.8         | 8.1           |
|                         |              |                |               | 85         | medium         | 278.9        | 250.4           | 26.5         | 54.5          |
|                         |              |                | G. Mexico     | 26         | low            | 16.9         | 8.7             | 7.3          | 7.8           |
|                         |              |                |               | 85         | low            | 31.1         | 16.0            | 34.8         | 21.6          |
| lepophidium brevibarbe  | 0.43         | 0.90           | G. Mexico     | 26         | low            | 0.6          | 0.5             | 11.6         | 53.7          |
|                         |              |                |               | 85         | low            | 1.7          | 2.2             | -80.3        | 23.8          |
| lepophidium jeannae     | 0.37         | 0.89           | SE U.S.       | 26         | high           | 52.3         | 85.8            | 276.5        | 347.1         |
|                         |              |                |               | 85         | low            | 368.0        | 174.7           | 2674.3       | 2790.6        |
|                         |              |                | G. Mexico     | 26         | medium         | 49.3         | 56.3            | 16.2         | 34.4          |
|                         |              |                |               | 85         | medium         | 157.0        | 128.0           | -40.2        | 59.5          |
| lepophidium profundorum | 0.36         | 0.69           | NE U.S.       | 26         | low            | 76.3         | 63.4            | 17.9         | 30.7          |
|                         |              |                |               | 85         | medium         | 500.1        | 291.4           | 46.6         | 69.8          |
| leptagonus decagonus    | 0.58         | 0.93           | E. Canada     | 26         | low            | 153.7        | 99.9            | -18.6        | 18.2          |
|                         |              |                |               | 85         | low            | 424.9        | 151.5           | -60.7        | 29.0          |
| leptasterias arctica    | 0.39         | 0.95           | E. Bering S.  | 26         | medium         | 85.3         | 69.9            | -21.5        | 105.5         |
|                         |              |                |               | 85         | low            | 148.7        | 84.3            | -99.4        | 1.4           |

| <b>Species</b>          | <b>devPA</b> | <b>devBiom</b> | <b>Region</b> | <b>RCP</b> | <b>Uncert.</b> | <b>Shift</b> | <b>sd_shift</b> | <b>%Hab.</b> | <b>sd_hab</b> |
|-------------------------|--------------|----------------|---------------|------------|----------------|--------------|-----------------|--------------|---------------|
| leptasterias polaris    | 0.33         | 0.85           | E. Canada     | 26         | medium         | 186.6        | 170.2           | -17.1        | 32.9          |
|                         |              |                |               | 85         | medium         | 639.6        | 475.7           | -74.0        | 33.7          |
|                         | 0.55         | 0.97           | E. Bering S.  | 26         | low            | 36.3         | 20.8            | -43.3        | 46.0          |
|                         |              |                |               | 85         | low            | 85.0         | 39.3            | -97.0        | 5.6           |
| leptoclinus maculatus   | 0.51         | 0.88           | E. Canada     | 26         | low            | 123.9        | 82.8            | -16.8        | 21.6          |
|                         |              |                |               | 85         | low            | 280.0        | 116.1           | -70.7        | 27.6          |
|                         | 0.24         | 0.93           | E. Bering S.  | 26         | low            | 46.9         | 27.4            | -34.3        | 37.4          |
|                         |              |                |               | 85         | low            | 128.4        | 33.7            | -92.6        | 11.8          |
| lethasterias nanimensis | 0.19         | 0.90           | E. Bering S.  | 26         | low            | 59.9         | 39.5            | -39.7        | 38.9          |
|                         |              |                |               | 85         | low            | 184.3        | 57.5            | -94.3        | 11.5          |
| leucoraja erinacea      | 0.54         | 0.88           | E. Canada     | 26         | high           | 272.6        | 194.6           | -32.5        | 32.9          |
|                         |              |                |               | 85         | high           | 765.2        | 556.9           | -77.3        | 17.6          |
| leucoraja garmani       | 0.41         | 0.80           | NE U.S.       | 26         | medium         | 168.5        | 164.9           | 23.0         | 58.9          |
|                         |              |                |               | 85         | low            | 647.6        | 235.5           | 704.6        | 376.0         |
|                         |              |                | G. Mexico     | 26         | high           | 73.1         | 75.9            | -60.5        | 25.6          |
|                         |              |                |               | 85         | medium         | 115.3        | 122.2           | -99.3        | 0.6           |
| leucoraja ocellata      | 0.40         | 0.84           | NE U.S.       | 26         | low            | 118.7        | 104.9           | -16.6        | 16.0          |
|                         |              |                |               | 85         | medium         | 455.8        | 270.1           | -64.4        | 28.4          |
| leuroglossus schmidti   | 0.35         | 0.84           | West U.S.     | 26         | low            | 208.5        | 153.6           | 21.1         | 18.6          |
|                         |              |                |               | 85         | low            | 805.7        | 223.2           | 75.0         | 30.9          |
| libinia emarginata      | 0.32         | 0.90           | SE U.S.       | 26         | high           | 12.8         | 26.1            | 434.6        | 505.3         |
|                         |              |                |               | 85         | medium         | 50.3         | 37.9            | 11514.1      | 7792.4        |
|                         |              |                | G. Mexico     | 26         | high           | 38.2         | 40.8            | 197.5        | 222.4         |
|                         |              |                |               | 85         | high           | 54.7         | 56.5            | 4951.6       | 5014.9        |
| limanda aspera          | 0.76         | 0.96           | E. Bering S.  | 26         | medium         | 69.3         | 58.3            | 103.3        | 375.8         |
|                         |              |                |               | 85         | medium         | 133.7        | 66.2            | -97.7        | 3.3           |
| limanda ferruginea      | 0.40         | 0.84           | E. Canada     | 26         | low            | 209.0        | 131.7           | -0.3         | 17.1          |
|                         |              |                |               | 85         | medium         | 710.1        | 284.2           | -42.4        | 36.5          |
| limanda proboscidea     | 0.66         | 0.96           | E. Bering S.  | 26         | medium         | 54.2         | 64.7            | -15.9        | 49.2          |
|                         |              |                |               | 85         | high           | 208.0        | 209.4           | -94.3        | 6.6           |
| limanda sakhalinensis   | 0.53         | 0.97           | E. Bering S.  | 26         | low            | 19.9         | 18.4            | -34.1        | 31.8          |
|                         |              |                |               | 85         | medium         | 71.2         | 68.7            | -90.8        | 14.4          |
| limulus polyphemus      | 0.42         | 0.90           | SE U.S.       | 26         | high           | 21.9         | 12.0            | 4.4          | 13.9          |
|                         |              |                |               | 85         | medium         | 85.7         | 69.7            | 134.7        | 92.5          |
|                         |              |                | G. Mexico     | 26         | low            | 28.5         | 20.9            | 53.0         | 43.6          |
|                         |              |                |               | 85         | high           | 43.1         | 18.8            | 506.5        | 266.7         |
| liparis atlanticus      | 0.13         | 0.69           | NE U.S.       | 26         | high           | 150.8        | 151.8           | 34.5         | 37.7          |
|                         |              |                |               | 85         | medium         | 347.4        | 211.9           | 171.5        | 92.4          |

| <b>Species</b>            | <b>devPA</b> | <b>devBiom</b> | <b>Region</b>      | <b>RCP</b> | <b>Uncert.</b> | <b>Shift</b> | <b>sd_shift</b> | <b>%Hab.</b> | <b>sd_hab</b> |
|---------------------------|--------------|----------------|--------------------|------------|----------------|--------------|-----------------|--------------|---------------|
| liparis gibbus            | 0.41         | 0.95           | E. Bering S.       | 26         | high           | 30.6         | 17.5            | -43.5        | 64.8          |
|                           |              |                |                    | 85         | high           | 203.6        | 353.0           | -99.6        | 1.2           |
| liponema brevicorne       | 0.32         | 0.27           | G. Alaska          | 26         | low            | 172.2        | 126.7           | 6.7          | 13.3          |
|                           |              |                |                    | 85         | low            | 706.5        | 261.5           | 47.6         | 38.7          |
| lithodes aequispinus      | 0.46         | 0.92           | E. Bering S.       | 26         | medium         | 138.3        | 99.7            | -45.9        | 40.9          |
|                           |              |                |                    | 85         | low            | 262.7        | 112.7           | -96.7        | 7.8           |
| lithodes couesi           | 0.44         | 0.81           | West U.S.          | 26         | medium         | 173.9        | 189.6           | 21.2         | 45.4          |
|                           |              |                |                    | 85         | medium         | 673.4        | 423.7           | 554.6        | 338.2         |
| lithodes maja             | 0.29         | 0.88           | E. Canada          | 26         | high           | 108.6        | 100.5           | 13.5         | 34.8          |
|                           |              |                |                    | 85         | high           | 278.8        | 240.7           | -40.4        | 51.6          |
| litopenaeus setiferus     | 0.47         | 0.95           | SE U.S.            | 26         | low            | 16.1         | 12.6            | 88.6         | 103.5         |
|                           |              |                |                    | 85         | medium         | 43.0         | 30.2            | 867.1        | 925.7         |
|                           |              |                | G. Mexico          | 26         | medium         | 17.9         | 10.4            | 33.6         | 32.9          |
| loligo pealeii            | 0.43         | 0.63           | NE U.S.            | 26         | medium         | 154.9        | 166.7           | 49.4         | 62.0          |
|                           |              |                |                    | 85         | high           | 345.4        | 414.9           | 446.1        | 207.2         |
|                           |              |                | G. Mexico          | 26         | medium         | 104.2        | 106.8           | -53.2        | 31.2          |
| lolliguncula brevis       | 0.56         | 0.96           | SE U.S.            | 26         | low            | 13.2         | 10.1            | 15.4         | 20.1          |
|                           |              |                |                    | 85         | medium         | 182.9        | 159.7           | 30.7         | 46.3          |
|                           |              |                | G. Mexico          | 26         | medium         | 13.4         | 11.9            | -12.3        | 10.5          |
| lophaster furcilliger     | 0.22         | 0.84           | G. Alaska          | 26         | medium         | 294.8        | 318.2           | 78.0         | 102.2         |
|                           |              |                |                    | 85         | medium         | 1034.9       | 673.6           | 553.9        | 220.7         |
|                           |              |                | lophius americanus | 0.30       | 0.53           | E. Canada    | 26              | high         | 320.3         |
| 85                        | high         | 614.6          |                    |            |                |              | 381.4           | -21.2        | 46.9          |
| G. Mexico                 | 26           | low            |                    |            |                | 54.3         | 25.5            | -41.8        | 20.0          |
| lopholithodes foraminatus | 0.20         | 0.89           | West U.S.          | 26         | low            | 241.3        | 208.6           | 19.9         | 16.9          |
|                           |              |                |                    | 85         | low            | 1357.5       | 404.8           | 55.6         | 43.0          |
|                           |              |                | G. Mexico          | 26         | medium         | 61.9         | 45.4            | 132.4        | 130.3         |
| luidia clathrata          | 0.33         | 0.89           | G. Mexico          | 85         | low            | 93.3         | 47.8            | 1036.6       | 618.4         |
|                           |              |                |                    | 26         | low            | 265.0        | 189.4           | 22.5         | 16.7          |
| luidia foliolata          | 0.48         | 0.92           | G. Alaska          | 85         | low            | 1074.7       | 256.3           | 87.2         | 57.0          |
|                           |              |                |                    | 26         | low            | 87.4         | 42.5            | -9.2         | 8.3           |
| lumpenus lampretæformis   | 0.33         | 0.90           | E. Canada          | 85         | low            | 253.0        | 88.7            | -43.0        | 27.8          |
|                           |              |                |                    | 26         | medium         | 40.3         | 35.1            | -9.0         | 28.8          |
| lumpenus sagitta          | 0.20         | 0.85           | E. Bering S.       | 85         | medium         | 110.3        | 108.4           | -69.4        | 32.6          |

| <b>Species</b>         | <b>devPA</b> | <b>devBiom</b> | <b>Region</b> | <b>RCP</b> | <b>Uncert.</b> | <b>Shift</b> | <b>sd_shift</b> | <b>%Hab.</b> | <b>sd_hab</b> |
|------------------------|--------------|----------------|---------------|------------|----------------|--------------|-----------------|--------------|---------------|
| lutjanus campechanus   | 0.56         | 0.97           | SE U.S.       | 26         | medium         | 74.5         | 75.3            | 95.0         | 85.2          |
|                        |              |                |               | 85         | medium         | 190.0        | 129.6           | 856.8        | 560.8         |
|                        |              |                | G. Mexico     | 26         | medium         | 16.2         | 21.1            | 7.9          | 8.5           |
|                        |              |                |               | 85         | medium         | 28.1         | 28.1            | 32.3         | 14.7          |
| lutjanus griseus       | 0.44         | 0.97           | SE U.S.       | 26         | high           | 83.4         | 164.0           | 889.2        | 1356.2        |
|                        |              |                |               | 85         | low            | 463.0        | 234.3           | 96662.7      | 206810.4      |
|                        |              |                | G. Mexico     | 26         | medium         | 37.6         | 36.7            | 70.3         | 79.5          |
|                        |              |                |               | 85         | low            | 205.6        | 114.0           | 71.2         | 177.2         |
| lutjanus synagris      | 0.47         | 0.98           | SE U.S.       | 26         | medium         | 71.1         | 76.0            | 187.3        | 159.0         |
|                        |              |                |               | 85         | low            | 418.2        | 135.8           | 5011.0       | 4890.9        |
|                        |              |                | G. Mexico     | 26         | low            | 35.0         | 29.1            | 103.3        | 85.5          |
|                        |              |                |               | 85         | low            | 105.9        | 39.5            | 998.9        | 478.2         |
| lycenchelys crotalinus | 0.60         | 0.82           | G. Alaska     | 26         | medium         | 162.2        | 145.9           | -15.4        | 21.2          |
|                        |              |                |               | 85         | high           | 775.3        | 452.5           | 97.1         | 175.5         |
| lycodes brevipes       | 0.40         | 0.36           | E. Bering S.  | 26         | low            | 131.8        | 81.6            | -7.8         | 11.0          |
|                        |              |                |               | 85         | high           | 368.7        | 216.5           | -21.3        | 36.8          |
| lycodes cortezianus    | 0.44         | 0.95           | G. Alaska     | 26         | low            | 255.6        | 196.1           | 2.1          | 10.9          |
|                        |              |                |               | 85         | low            | 1128.6       | 274.1           | 2.8          | 37.7          |
| lycodes diapterus      | 0.37         | 0.91           | G. Alaska     | 26         | low            | 242.4        | 167.0           | 0.2          | 11.3          |
|                        |              |                |               | 85         | medium         | 1018.7       | 290.8           | -23.8        | 39.4          |
| lycodes esmarkii       | 0.38         | 0.86           | E. Canada     | 26         | low            | 113.8        | 73.6            | -3.8         | 7.9           |
|                        |              |                |               | 85         | low            | 413.3        | 149.2           | -43.0        | 29.2          |
| lycodes pacificus      | 0.39         | 0.95           | West U.S.     | 26         | low            | 239.0        | 160.7           | 49.5         | 42.1          |
|                        |              |                |               | 85         | low            | 1000.8       | 257.6           | 290.3        | 113.6         |
| lycodes palearis       | 0.40         | 0.16           | E. Bering S.  | 26         | low            | 28.5         | 23.7            | -4.7         | 6.7           |
|                        |              |                |               | 85         | medium         | 74.8         | 59.2            | -7.2         | 19.7          |
| lycodes raridens       | 0.57         | 0.96           | E. Bering S.  | 26         | medium         | 25.4         | 12.5            | -42.3        | 40.6          |
|                        |              |                |               | 85         | low            | 111.9        | 79.1            | -97.4        | 4.2           |
| lycodes reticulatus    | 0.55         | 0.86           | E. Canada     | 26         | low            | 134.1        | 82.1            | -20.0        | 26.6          |
|                        |              |                |               | 85         | low            | 284.2        | 126.2           | -72.4        | 30.7          |
| lycodes vahlii         | 0.44         | 0.84           | E. Canada     | 26         | medium         | 136.8        | 108.5           | -0.1         | 21.5          |
|                        |              |                |               | 85         | low            | 388.0        | 132.8           | -37.5        | 45.0          |
| lyopsetta exilis       | 0.53         | 0.88           | G. Alaska     | 26         | low            | 296.6        | 205.4           | 24.4         | 21.4          |
|                        |              |                |               | 85         | high           | 958.3        | 329.8           | 126.8        | 57.3          |
| macrourus berglax      | 0.78         | 0.89           | E. Canada     | 26         | medium         | 160.0        | 131.7           | 3.4          | 13.2          |
|                        |              |                |               | 85         | low            | 444.3        | 145.7           | -15.4        | 41.8          |
| mactromeris polynyma   | 0.41         | 0.93           | E. Bering S.  | 26         | medium         | 46.8         | 35.4            | -11.4        | 34.7          |
|                        |              |                |               | 85         | low            | 195.3        | 82.7            | -80.2        | 15.0          |

| <b>Species</b>           | <b>devPA</b> | <b>devBiom</b> | <b>Region</b> | <b>RCP</b> | <b>Uncert.</b> | <b>Shift</b> | <b>sd_shift</b> | <b>%Hab.</b> | <b>sd_hab</b> |
|--------------------------|--------------|----------------|---------------|------------|----------------|--------------|-----------------|--------------|---------------|
| malacocottus zonurus     | 0.45         | 0.78           | E. Bering S.  | 26         | medium         | 145.9        | 66.6            | -51.2        | 42.7          |
|                          |              |                |               | 85         | medium         | 303.5        | 179.8           | -98.3        | 3.2           |
| malacoraja senta         | 0.32         | 0.85           | E. Canada     | 26         | low            | 121.6        | 70.4            | 10.6         | 12.7          |
|                          |              |                |               | 85         | medium         | 464.6        | 249.0           | 2.9          | 27.0          |
| malacosteus niger        | 0.57         | 0.91           | E. Canada     | 26         | medium         | 182.9        | 115.4           | -1.3         | 19.5          |
|                          |              |                |               | 85         | low            | 352.9        | 161.1           | 5.2          | 40.8          |
| mallotus villosus        | 0.64         | 0.86           | E. Canada     | 26         | low            | 154.2        | 107.8           | -12.5        | 23.0          |
|                          |              |                |               | 85         | low            | 346.0        | 181.6           | -63.2        | 36.5          |
| maurolicus weitzmani     | 0.45         | 0.92           | E. Bering S.  | 26         | high           | 41.2         | 26.8            | -25.8        | 32.2          |
|                          |              |                |               | 85         | medium         | 102.6        | 56.8            | -89.9        | 14.2          |
| mediaster aequalis       | 0.28         | 0.62           | NE U.S.       | 26         | high           | 214.5        | 219.7           | 90.8         | 114.1         |
|                          |              |                |               | 85         | low            | 422.5        | 211.3           | 326.7        | 262.3         |
| mediaster aequalis       | 0.23         | 0.19           | G. Alaska     | 26         | low            | 171.2        | 127.1           | 15.5         | 12.9          |
|                          |              |                |               | 85         | low            | 562.6        | 136.3           | 35.9         | 26.1          |
| melanogrammus aeglefinus | 0.49         | 0.89           | E. Canada     | 26         | low            | 131.9        | 91.2            | 3.4          | 10.1          |
|                          |              |                |               | 85         | low            | 495.2        | 253.2           | -26.7        | 36.7          |
| melanostigma atlanticum  | 0.30         | 0.80           | NE U.S.       | 26         | medium         | 136.0        | 134.6           | 2.7          | 30.1          |
|                          |              |                |               | 85         | low            | 882.8        | 258.7           | -26.6        | 46.8          |
| menidia menidia          | 0.48         | 0.70           | E. Canada     | 26         | high           | 379.0        | 417.7           | -32.4        | 44.4          |
|                          |              |                |               | 85         | high           | 802.0        | 647.3           | -81.9        | 21.1          |
| menippe mercenaria       | 0.37         | 0.93           | SE U.S.       | 26         | high           | 51.8         | 33.8            | 104.9        | 82.1          |
|                          |              |                |               | 85         | medium         | 122.4        | 75.6            | 881.5        | 919.7         |
|                          |              |                | G. Mexico     | 26         | medium         | 34.5         | 16.3            | 66.1         | 53.6          |
| menticirrhus americanus  | 0.55         | 0.92           | SE U.S.       | 85         | medium         | 93.9         | 48.0            | 366.2        | 254.3         |
|                          |              |                |               | 26         | low            | 7.7          | 5.0             | 18.1         | 17.1          |
|                          |              |                | G. Mexico     | 85         | medium         | 67.4         | 72.0            | 56.8         | 43.9          |
| menticirrhus littoralis  | 0.47         | 0.97           | SE U.S.       | 26         | low            | 16.2         | 8.2             | -5.8         | 7.9           |
|                          |              |                |               | 85         | medium         | 34.2         | 21.5            | -31.8        | 14.4          |
|                          |              |                | G. Mexico     | 26         | high           | 7.0          | 5.9             | 37.3         | 26.0          |
| menticirrhus saxatilis   | 0.33         | 0.70           | SE U.S.       | 85         | medium         | 57.0         | 69.5            | 197.9        | 78.1          |
|                          |              |                |               | 26         | high           | 9.1          | 5.6             | 17.0         | 11.2          |
|                          |              |                | G. Mexico     | 85         | medium         | 19.1         | 11.4            | 73.8         | 25.6          |
| merluccius albidus       | 0.46         | 0.81           | SE U.S.       | 26         | medium         | 33.4         | 34.9            | -10.6        | 14.8          |
|                          |              |                |               | 85         | low            | 431.2        | 232.6           | -56.0        | 12.7          |
|                          |              |                | G. Mexico     | 26         | high           | 56.7         | 54.5            | -35.3        | 22.5          |
| merluccius albidus       | 0.46         | 0.81           | NE U.S.       | 85         | medium         | 82.4         | 96.7            | -94.1        | 3.6           |
|                          |              |                |               | 26         | low            | 104.7        | 92.7            | 55.9         | 54.3          |
|                          |              |                |               | 85         | medium         | 454.5        | 276.0           | 359.6        | 252.8         |



| <b>Species</b>            | <b>devPA</b> | <b>devBiom</b> | <b>Region</b> | <b>RCP</b> | <b>Uncert.</b> | <b>Shift</b> | <b>sd_shift</b> | <b>%Hab.</b> | <b>sd_hab</b> |
|---------------------------|--------------|----------------|---------------|------------|----------------|--------------|-----------------|--------------|---------------|
| merluccius bilinearis     | 0.51         | 0.73           | E. Canada     | 26         | low            | 133.5        | 106.5           | 10.4         | 20.7          |
|                           |              |                |               | 85         | low            | 592.6        | 246.2           | -2.6         | 36.1          |
| merluccius productus      | 0.62         | 0.93           | G. Alaska     | 26         | low            | 281.8        | 208.8           | 21.9         | 18.3          |
|                           |              |                |               | 85         | low            | 1175.3       | 264.2           | 100.7        | 53.6          |
| metacarcinus magister     | 0.57         | 0.95           | G. Alaska     | 26         | medium         | 168.4        | 203.3           | 231.2        | 434.1         |
|                           |              |                |               | 85         | high           | 785.1        | 738.1           | 10650.2      | 34516.8       |
| metridium farcimen        | 0.30         | 0.13           | G. Alaska     | 26         | low            | 90.1         | 82.9            | 18.1         | 11.2          |
|                           |              |                |               | 85         | low            | 374.6        | 163.2           | 80.4         | 29.9          |
| microgadus proximus       | 0.35         | 0.88           | West U.S.     | 26         | low            | 332.3        | 250.0           | 24.5         | 21.4          |
|                           |              |                |               | 85         | low            | 1671.2       | 370.9           | 158.4        | 91.8          |
| micropogonias undulatus   | 0.55         | 0.93           | SE U.S.       | 26         | medium         | 29.9         | 23.0            | -8.3         | 13.2          |
|                           |              |                |               | 85         | high           | 286.1        | 278.4           | 300.1        | 303.2         |
|                           |              |                | G. Mexico     | 26         | low            | 30.9         | 20.2            | 38.3         | 42.2          |
|                           |              |                |               | 85         | low            | 102.8        | 43.2            | 513.7        | 374.0         |
| microstomus pacificus     | 0.58         | 0.34           | G. Alaska     | 26         | low            | 258.1        | 170.3           | 9.1          | 8.8           |
|                           |              |                |               | 85         | low            | 880.9        | 134.4           | 7.1          | 21.7          |
| modiolus modiolus         | 0.19         | 0.91           | E. Bering S.  | 26         | low            | 63.3         | 42.1            | -31.1        | 42.4          |
|                           |              |                |               | 85         | low            | 194.4        | 55.6            | -91.7        | 14.9          |
| molpadia intermedia       | 0.23         | 0.31           | G. Alaska     | 26         | low            | 88.4         | 56.7            | 6.0          | 11.0          |
|                           |              |                |               | 85         | medium         | 401.7        | 238.5           | 22.5         | 21.1          |
| monacanthus ciliatus      | 0.56         | 0.90           | SE U.S.       | 26         | high           | 39.1         | 75.1            | 1392.7       | 2385.8        |
|                           |              |                |               | 85         | medium         | 349.6        | 267.5           | 70402.9      | 96375.3       |
|                           |              |                | G. Mexico     | 26         | low            | 25.6         | 20.6            | 119.6        | 127.4         |
|                           |              |                |               | 85         | low            | 117.1        | 65.5            | 551.6        | 580.4         |
| moreiradromia antillensis | 0.48         | 0.91           | G. Mexico     | 26         | medium         | 28.3         | 27.1            | 87.9         | 101.3         |
|                           |              |                |               | 85         | medium         | 123.8        | 91.2            | 115.0        | 245.4         |
| morone saxatilis          | 0.36         | 0.89           | NE U.S.       | 26         | medium         | 73.0         | 91.9            | 309.8        | 707.1         |
|                           |              |                |               | 85         | high           | 362.5        | 503.3           | 3176.3       | 7799.3        |
| mullus auratus            | 0.38         | 0.87           | SE U.S.       | 26         | high           | 41.7         | 64.3            | 560.1        | 1059.1        |
|                           |              |                |               | 85         | medium         | 294.9        | 156.1           | 6925.0       | 6478.8        |
|                           |              |                | G. Mexico     | 26         | medium         | 47.1         | 54.3            | 68.6         | 72.9          |
|                           |              |                |               | 85         | high           | 72.6         | 102.6           | 469.9        | 445.3         |
| musculus discors          | 0.25         | 0.95           | E. Bering S.  | 26         | medium         | 76.7         | 47.8            | -20.4        | 108.5         |
|                           |              |                |               | 85         | medium         | 170.7        | 85.4            | -98.8        | 2.7           |
| mustelus canis            | 0.42         | 0.88           | SE U.S.       | 26         | medium         | 126.4        | 94.8            | -16.0        | 27.5          |
|                           |              |                |               | 85         | low            | 474.9        | 156.5           | 74.3         | 106.3         |
|                           |              |                | G. Mexico     | 26         | low            | 50.3         | 32.8            | -8.9         | 9.6           |
|                           |              |                |               | 85         | low            | 89.4         | 60.2            | 53.1         | 41.7          |

| <b>Species</b>                  | <b>devPA</b> | <b>devBiom</b> | <b>Region</b> | <b>RCP</b> | <b>Uncert.</b> | <b>Shift</b> | <b>sd_shift</b> | <b>%Hab.</b> | <b>sd_hab</b> |
|---------------------------------|--------------|----------------|---------------|------------|----------------|--------------|-----------------|--------------|---------------|
| mycale loveni                   | 0.32         | 0.77           | E. Bering S.  | 26         | low            | 157.5        | 101.3           | -40.5        | 48.5          |
|                                 |              |                |               | 85         | low            | 462.5        | 210.0           | -95.9        | 9.5           |
| myliobatis freminvillii         | 0.49         | 0.96           | SE U.S.       | 26         | low            | 34.7         | 32.7            | -6.9         | 11.8          |
|                                 |              |                |               | 85         | low            | 607.0        | 296.9           | -6.6         | 48.3          |
|                                 |              |                | G. Mexico     | 26         | low            | 71.7         | 54.4            | -34.8        | 23.5          |
|                                 |              |                |               | 85         | high           | 198.9        | 113.9           | -95.5        | 7.8           |
| myoxocephalus octodecemspinosus | 0.41         | 0.84           | E. Canada     | 26         | low            | 144.7        | 89.1            | -4.6         | 11.8          |
|                                 |              |                |               | 85         | low            | 525.6        | 141.9           | -45.0        | 29.0          |
| myoxocephalus scorpius          | 0.42         | 0.96           | E. Canada     | 26         | high           | 63.7         | 49.9            | -22.1        | 24.1          |
| myxine glutinosa                | 0.27         | 0.81           | E. Canada     | 26         | low            | 88.2         | 68.3            | 21.0         | 23.1          |
|                                 |              |                |               | 85         | low            | 541.6        | 222.3           | 25.3         | 47.2          |
| myxoderma platyacanthum         | 0.43         | 0.94           | G. Alaska     | 26         | medium         | 177.3        | 111.1           | 25.3         | 29.8          |
|                                 |              |                |               | 85         | high           | 404.3        | 272.1           | 143.5        | 102.7         |
| nearchaster aciculosus          | 0.52         | 0.81           | West U.S.     | 26         | high           | 331.5        | 199.6           | 17.6         | 53.7          |
|                                 |              |                |               | 85         | low            | 1033.8       | 387.1           | 718.8        | 545.1         |
| nemichthys scolopaceus          | 0.40         | 0.86           | E. Canada     | 26         | medium         | 144.4        | 101.1           | 8.9          | 16.9          |
|                                 |              |                |               | 85         | low            | 474.0        | 161.1           | 3.4          | 32.8          |
| neomerinthe hemingwayi          | 0.36         | 0.88           | SE U.S.       | 26         | medium         | 24.7         | 21.0            | 177.7        | 140.7         |
|                                 |              |                |               | 85         | low            | 77.2         | 36.1            | 4275.5       | 2373.9        |
|                                 |              |                | G. Mexico     | 26         | low            | 17.9         | 12.0            | 115.7        | 98.9          |
|                                 |              |                |               | 85         | low            | 38.0         | 19.6            | 3927.5       | 2983.3        |
| neptunea amianta                | 0.37         | 0.19           | E. Bering S.  | 26         | low            | 150.4        | 98.6            | -11.1        | 8.0           |
|                                 |              |                |               | 85         | low            | 387.8        | 120.9           | -48.0        | 15.4          |
| neptunea borealis               | 0.37         | 0.92           | E. Bering S.  | 26         | low            | 46.7         | 31.0            | -31.4        | 44.1          |
|                                 |              |                |               | 85         | low            | 157.0        | 71.0            | -93.6        | 10.0          |
| neptunea heros                  | 0.57         | 0.94           | E. Bering S.  | 26         | low            | 67.8         | 57.7            | -29.9        | 43.7          |
|                                 |              |                |               | 85         | low            | 221.0        | 97.5            | -92.5        | 12.9          |
| neptunea lyrata                 | 0.43         | 0.90           | E. Bering S.  | 26         | medium         | 95.0         | 83.7            | -25.5        | 58.8          |
|                                 |              |                |               | 85         | medium         | 217.4        | 50.3            | -88.9        | 23.7          |
| neptunea pribiloffensis         | 0.56         | 0.92           | E. Bering S.  | 26         | low            | 51.1         | 31.5            | -31.9        | 51.5          |
|                                 |              |                |               | 85         | low            | 143.2        | 48.7            | -92.4        | 15.9          |
| neptunea ventricosa             | 0.53         | 0.97           | E. Bering S.  | 26         | medium         | 87.1         | 61.9            | -18.6        | 117.7         |
|                                 |              |                |               | 85         | medium         | 165.4        | 98.4            | -99.0        | 2.2           |
| nezumia bairdii                 | 0.63         | 0.85           | E. Canada     | 26         | medium         | 130.8        | 104.9           | 12.9         | 14.7          |
|                                 |              |                |               | 85         | low            | 364.6        | 152.9           | 6.8          | 46.4          |
| nezumia liolepis                | 0.50         | 0.85           | West U.S.     | 26         | high           | 183.0        | 242.0           | 31.3         | 49.2          |
|                                 |              |                |               | 85         | medium         | 1130.8       | 591.5           | 749.2        | 551.8         |

| <b>Species</b>              | <b>devPA</b> | <b>devBiom</b> | <b>Region</b> | <b>RCP</b> | <b>Uncert.</b> | <b>Shift</b> | <b>sd_shift</b> | <b>%Hab.</b> | <b>sd_hab</b> |
|-----------------------------|--------------|----------------|---------------|------------|----------------|--------------|-----------------|--------------|---------------|
| nezumia stelgidolepis       | 0.38         | 0.89           | West U.S.     | 26         | high           | 103.9        | 134.5           | 34.5         | 29.3          |
|                             |              |                |               | 85         | medium         | 283.3        | 225.4           | 260.4        | 167.0         |
| occella dodecaedron         | 0.44         | 0.92           | E. Bering S.  | 26         | low            | 37.4         | 35.8            | -25.9        | 37.6          |
|                             |              |                |               | 85         | medium         | 181.8        | 126.2           | -91.5        | 10.2          |
| octopoteuthis deletron      | 0.50         | 0.96           | G. Alaska     | 26         | medium         | 296.0        | 289.2           | 0.5          | 18.8          |
|                             |              |                |               | 85         | medium         | 1490.8       | 384.8           | 72.3         | 51.6          |
| octopus californicus        | 0.47         | 0.98           | West U.S.     | 26         | medium         | 310.7        | 277.8           | 48.7         | 52.2          |
|                             |              |                |               | 85         | low            | 1241.1       | 356.3           | 239.9        | 141.5         |
| ogcocephalus declivirostris | 0.36         | 0.91           | G. Mexico     | 26         | high           | 53.7         | 55.5            | 21.4         | 40.3          |
|                             |              |                |               | 85         | low            | 210.1        | 136.7           | -20.2        | 66.5          |
| ogcocephalus parvus         | 0.31         | 0.96           | SE U.S.       | 26         | low            | 89.9         | 78.1            | 209.6        | 214.6         |
|                             |              |                |               | 85         | low            | 281.9        | 163.5           | 2156.3       | 1942.5        |
|                             |              |                |               | G. Mexico  | 26             | medium       | 66.9            | 72.2         | -4.4          |
| ogcocephalus radiatus       | 0.27         | 0.88           | G. Mexico     | 85         | medium         | 283.3        | 141.9           | -77.0        | 25.8          |
|                             |              |                |               | 26         | medium         | 6.0          | 3.5             | 23.6         | 22.0          |
|                             |              |                |               | 85         | medium         | 15.6         | 10.0            | 273.1        | 97.4          |
| oncorhynchus keta           | 0.18         | 0.75           | E. Bering S.  | 26         | low            | 86.1         | 58.8            | -5.2         | 23.6          |
|                             |              |                |               | 85         | medium         | 313.5        | 164.9           | -43.3        | 74.7          |
| oncorhynchus tshawytscha    | 0.23         | 0.05           | E. Bering S.  | 26         | low            | 54.3         | 45.5            | 6.9          | 6.1           |
|                             |              |                |               | 85         | low            | 229.9        | 49.2            | 10.7         | 18.0          |
| ophidion grayi              | 0.22         | 0.88           | SE U.S.       | 26         | high           | 86.4         | 86.1            | 312.1        | 368.9         |
|                             |              |                |               | 85         | low            | 289.0        | 144.0           | 10748.3      | 13151.8       |
|                             |              |                |               | G. Mexico  | 26             | medium       | 44.3            | 46.9         | 20.0          |
| ophidion holbrookii         | 0.37         | 0.93           | SE U.S.       | 85         | low            | 268.2        | 144.6           | -59.7        | 43.9          |
|                             |              |                |               | 26         | high           | 82.3         | 91.2            | 269.0        | 297.4         |
|                             |              |                |               | 85         | low            | 309.4        | 165.8           | 8567.6       | 8573.6        |
| ophidion marginatum         | 0.30         | 0.78           | G. Mexico     | 26         | medium         | 24.5         | 24.6            | 34.2         | 44.4          |
|                             |              |                |               | 85         | low            | 89.2         | 52.6            | 3.8          | 88.5          |
|                             |              |                |               | 26         | medium         | 27.3         | 28.8            | 7.9          | 8.9           |
| ophidion welshi             | 0.31         | 0.88           | SE U.S.       | 85         | low            | 399.7        | 166.2           | 40.2         | 37.9          |
|                             |              |                |               | 26         | low            | 23.4         | 20.4            | -23.7        | 13.4          |
|                             |              |                |               | 85         | medium         | 55.3         | 39.1            | -76.4        | 8.1           |
| ophiodon elongatus          | 0.40         | 0.91           | G. Alaska     | 26         | high           | 48.9         | 82.5            | 233.7        | 248.7         |
|                             |              |                |               | 85         | low            | 294.6        | 151.4           | 4441.6       | 7667.3        |
|                             |              |                |               | 26         | medium         | 36.6         | 45.6            | 38.4         | 32.0          |
|                             |              |                |               | 85         | low            | 182.5        | 116.6           | 16.8         | 56.9          |
|                             |              |                |               | 26         | low            | 385.9        | 295.8           | 27.4         | 37.9          |
|                             |              |                |               | 85         | low            | 1574.8       | 333.7           | 134.7        | 83.9          |

| <b>Species</b>              | <b>devPA</b> | <b>devBiom</b> | <b>Region</b> | <b>RCP</b> | <b>Uncert.</b> | <b>Shift</b> | <b>sd_shift</b> | <b>%Hab.</b> | <b>sd_hab</b> |
|-----------------------------|--------------|----------------|---------------|------------|----------------|--------------|-----------------|--------------|---------------|
| ophiolepis elegans          | 0.33         | 0.87           | G. Mexico     | 26         | medium         | 54.6         | 54.5            | 50.4         | 59.0          |
|                             |              |                |               | 85         | medium         | 219.0        | 146.9           | 7.6          | 109.4         |
| ophiopholis aculeata        | 0.23         | 0.76           | E. Bering S.  | 26         | low            | 66.7         | 46.2            | -46.4        | 35.2          |
|                             |              |                |               | 85         | low            | 143.8        | 48.9            | -96.4        | 8.3           |
| opisthonema oglinum         | 0.48         | 0.96           | SE U.S.       | 26         | low            | 13.5         | 9.1             | 7.3          | 11.1          |
|                             |              |                |               | 85         | medium         | 136.0        | 135.1           | 59.0         | 48.3          |
|                             |              |                | G. Mexico     | 26         | low            | 11.8         | 6.7             | 5.2          | 7.1           |
|                             |              |                |               | 85         | medium         | 32.8         | 18.6            | 4.1          | 18.8          |
| opisthoteuthis californiana | 0.32         | 0.92           | West U.S.     | 26         | medium         | 345.2        | 373.5           | 12.3         | 13.7          |
|                             |              |                |               | 85         | low            | 1771.7       | 410.9           | 50.6         | 36.6          |
| oregonia gracilis           | 0.20         | 0.18           | E. Bering S.  | 26         | low            | 41.2         | 35.6            | 12.7         | 23.2          |
|                             |              |                |               | 85         | low            | 167.7        | 70.5            | 45.2         | 39.4          |
| orthasterias koehleri       | 0.16         | 0.19           | E. Bering S.  | 26         | low            | 63.2         | 42.3            | 3.1          | 12.2          |
|                             |              |                |               | 85         | low            | 223.2        | 55.6            | -22.9        | 20.0          |
| orthopristis chrysoptera    | 0.42         | 0.95           | SE U.S.       | 26         | low            | 27.6         | 26.6            | -13.5        | 15.4          |
|                             |              |                |               | 85         | medium         | 394.7        | 258.1           | -54.9        | 16.3          |
|                             |              |                | G. Mexico     | 26         | medium         | 17.9         | 22.6            | -14.0        | 11.8          |
|                             |              |                |               | 85         | high           | 43.5         | 41.0            | -34.1        | 13.5          |
| ovalipes floridaus          | 0.31         | 0.85           | G. Mexico     | 26         | medium         | 42.1         | 31.8            | 176.3        | 187.6         |
|                             |              |                |               | 85         | high           | 73.1         | 64.1            | 9245.1       | 9954.5        |
| ovalipes ocellatus          | 0.36         | 0.82           | SE U.S.       | 26         | low            | 182.6        | 146.7           | 37.1         | 61.3          |
|                             |              |                |               | 85         | low            | 638.2        | 161.2           | 218.4        | 235.2         |
| ovalipes stephensoni        | 0.53         | 0.89           | SE U.S.       | 26         | low            | 13.2         | 11.6            | 20.6         | 27.2          |
|                             |              |                |               | 85         | medium         | 105.9        | 101.4           | -20.8        | 46.6          |
|                             |              |                | G. Mexico     | 26         | medium         | 53.6         | 42.0            | -27.7        | 20.9          |
|                             |              |                |               | 85         | medium         | 147.9        | 55.0            | -91.6        | 11.1          |
| pagrus pagrus               | 0.40         | 0.87           | SE U.S.       | 26         | medium         | 9.1          | 11.9            | 514.3        | 623.8         |
|                             |              |                |               | 85         | medium         | 47.1         | 45.1            | 23662.4      | 18074.5       |
|                             |              |                | G. Mexico     | 26         | high           | 16.8         | 10.8            | 183.4        | 180.9         |
|                             |              |                |               | 85         | medium         | 31.7         | 24.5            | 10745.9      | 12338.2       |
| pagurus aleuticus           | 0.32         | 0.86           | E. Bering S.  | 26         | low            | 74.6         | 62.0            | -19.5        | 51.6          |
|                             |              |                |               | 85         | low            | 189.1        | 65.7            | -80.9        | 39.2          |
| pagurus capillatus          | 0.23         | 0.86           | E. Bering S.  | 26         | low            | 76.6         | 51.6            | -32.1        | 53.3          |
|                             |              |                |               | 85         | low            | 190.0        | 64.2            | -94.8        | 10.2          |
| pagurus confragosus         | 0.25         | 0.84           | E. Bering S.  | 26         | low            | 62.3         | 50.6            | -21.8        | 59.4          |
|                             |              |                |               | 85         | low            | 157.1        | 43.0            | -88.3        | 27.8          |
| pagurus kennerlyi           | 0.28         | 0.93           | E. Bering S.  | 26         | low            | 94.2         | 68.4            | -24.1        | 41.4          |
|                             |              |                |               | 85         | low            | 265.6        | 62.7            | -81.3        | 32.1          |

| <b>Species</b>            | <b>devPA</b> | <b>devBiom</b> | <b>Region</b> | <b>RCP</b> | <b>Uncert.</b> | <b>Shift</b> | <b>sd_shift</b> | <b>%Hab.</b> | <b>sd_hab</b> |
|---------------------------|--------------|----------------|---------------|------------|----------------|--------------|-----------------|--------------|---------------|
| pagurus ochotensis        | 0.45         | 0.95           | E. Bering S.  | 26         | medium         | 37.6         | 30.9            | -5.9         | 107.7         |
|                           |              |                |               | 85         | medium         | 93.0         | 32.3            | -96.8        | 4.7           |
| pagurus pollicaris        | 0.48         | 0.94           | SE U.S.       | 26         | low            | 21.6         | 19.6            | 98.1         | 113.3         |
|                           |              |                |               | 85         | low            | 57.9         | 20.6            | 652.0        | 597.1         |
|                           |              |                | G. Mexico     | 26         | medium         | 21.0         | 19.5            | 18.0         | 14.2          |
|                           |              |                |               | 85         | high           | 48.7         | 24.2            | 36.9         | 37.2          |
| pagurus rathbuni          | 0.46         | 0.95           | E. Bering S.  | 26         | low            | 49.4         | 32.0            | -35.1        | 55.0          |
|                           |              |                |               | 85         | low            | 122.6        | 45.3            | -95.5        | 8.6           |
| pagurus trigonocheirus    | 0.32         | 0.89           | E. Bering S.  | 26         | low            | 84.0         | 61.8            | -35.7        | 52.6          |
|                           |              |                |               | 85         | low            | 178.9        | 86.6            | -95.3        | 10.4          |
| pandalopsis ampla         | 0.51         | 0.95           | West U.S.     | 26         | high           | 355.3        | 264.3           | 28.6         | 64.6          |
|                           |              |                |               | 85         | medium         | 1920.1       | 722.0           | 546.1        | 480.9         |
| pandalopsis dispar        | 0.38         | 0.20           | G. Alaska     | 26         | low            | 157.9        | 121.3           | 28.7         | 21.8          |
|                           |              |                |               | 85         | low            | 576.9        | 270.6           | 136.9        | 63.7          |
| pandalus borealis         | 0.51         | 0.85           | E. Canada     | 26         | low            | 145.9        | 88.0            | -2.1         | 16.1          |
|                           |              |                |               | 85         | low            | 351.4        | 126.4           | -49.6        | 38.2          |
| pandalus eous             | 0.28         | 0.81           | E. Bering S.  | 26         | medium         | 39.8         | 49.9            | -42.5        | 34.4          |
|                           |              |                |               | 85         | low            | 151.1        | 46.4            | -91.9        | 15.4          |
| pandalus goniurus         | 0.33         | 0.89           | E. Bering S.  | 26         | high           | 116.1        | 94.3            | 75.5         | 218.4         |
|                           |              |                |               | 85         | high           | 328.4        | 284.3           | -48.7        | 82.6          |
| pandalus jordani          | 0.26         | 0.17           | G. Alaska     | 26         | low            | 248.9        | 168.6           | 18.7         | 13.2          |
|                           |              |                |               | 85         | low            | 918.9        | 162.2           | 42.9         | 35.5          |
| pandalus montagui         | 0.48         | 0.85           | E. Canada     | 26         | low            | 137.9        | 83.4            | -11.2        | 23.7          |
|                           |              |                |               | 85         | low            | 263.7        | 123.7           | -69.4        | 29.5          |
| pandalus platyceros       | 0.25         | 0.92           | West U.S.     | 26         | low            | 170.7        | 137.6           | 27.1         | 19.3          |
|                           |              |                |               | 85         | low            | 600.2        | 237.4           | 138.8        | 64.8          |
| pandalus tridens          | 0.24         | 0.09           | E. Bering S.  | 26         | low            | 57.5         | 28.0            | -14.3        | 15.5          |
|                           |              |                |               | 85         | low            | 134.4        | 40.7            | -60.6        | 13.7          |
| pannychia moseleyi        | 0.34         | 0.91           | West U.S.     | 26         | low            | 214.4        | 171.9           | 24.5         | 32.3          |
|                           |              |                |               | 85         | medium         | 802.6        | 296.9           | 103.5        | 69.2          |
| paractinostola faeculenta | 0.59         | 0.92           | G. Alaska     | 26         | low            | 241.8        | 201.2           | 11.8         | 22.1          |
|                           |              |                |               | 85         | medium         | 1169.1       | 335.5           | 71.9         | 58.0          |
| paralichthys albigutta    | 0.33         | 0.96           | SE U.S.       | 26         | medium         | 59.2         | 77.0            | -18.2        | 14.7          |
|                           |              |                |               | 85         | high           | 451.4        | 408.7           | -21.3        | 32.2          |
|                           |              |                | G. Mexico     | 26         | medium         | 20.7         | 23.9            | -10.1        | 13.4          |
|                           |              |                |               | 85         | high           | 76.0         | 38.0            | -18.3        | 27.5          |
| paralichthys dentatus     | 0.46         | 0.85           | NE U.S.       | 26         | high           | 52.9         | 74.6            | 63.6         | 77.9          |
|                           |              |                |               | 85         | high           | 137.8        | 153.3           | 277.2        | 243.7         |

| <b>Species</b>             | <b>devPA</b> | <b>devBiom</b> | <b>Region</b> | <b>RCP</b> | <b>Uncert.</b> | <b>Shift</b> | <b>sd_shift</b> | <b>%Hab.</b> | <b>sd_hab</b> |
|----------------------------|--------------|----------------|---------------|------------|----------------|--------------|-----------------|--------------|---------------|
| paralichthys lethostigma   | 0.30         | 0.97           | SE U.S.       | 26         | low            | 17.3         | 14.4            | 20.2         | 15.1          |
|                            |              |                |               | 85         | high           | 150.1        | 214.1           | 125.2        | 70.5          |
|                            |              |                | G. Mexico     | 26         | low            | 18.5         | 10.7            | 0.6          | 3.9           |
|                            |              |                |               | 85         | low            | 41.0         | 28.9            | 12.2         | 10.7          |
| paralichthys squamilentus  | 0.23         | 0.96           | SE U.S.       | 26         | low            | 44.1         | 30.9            | 79.9         | 55.3          |
|                            |              |                |               | 85         | low            | 144.0        | 92.9            | 1045.3       | 478.4         |
|                            |              |                | G. Mexico     | 26         | low            | 14.3         | 10.1            | 34.5         | 33.1          |
|                            |              |                |               | 85         | low            | 46.8         | 25.0            | 498.2        | 262.3         |
| paralithodes camtschaticus | 0.52         | 0.96           | E. Bering S.  | 26         | medium         | 100.6        | 82.5            | 134.4        | 543.7         |
|                            |              |                |               | 85         | low            | 213.2        | 84.5            | -99.0        | 1.8           |
| paralithodes platypus      | 0.39         | 0.92           | E. Bering S.  | 26         | low            | 42.5         | 26.3            | -32.3        | 32.1          |
|                            |              |                |               | 85         | low            | 150.4        | 73.7            | -90.7        | 12.6          |
| paralomis multispina       | 0.46         | 0.76           | West U.S.     | 26         | high           | 268.5        | 269.8           | 20.9         | 43.1          |
|                            |              |                |               | 85         | medium         | 1284.6       | 613.8           | 760.2        | 658.8         |
| parapasiphaea sulcatifrons | 0.57         | 0.91           | E. Canada     | 26         | low            | 160.6        | 118.0           | -0.2         | 20.7          |
|                            |              |                |               | 85         | low            | 424.6        | 188.9           | 6.3          | 34.0          |
| parapenaeus politus        | 0.37         | 0.89           | G. Mexico     | 26         | medium         | 27.7         | 22.8            | 87.2         | 82.7          |
|                            |              |                |               | 85         | medium         | 49.2         | 33.5            | 763.0        | 496.1         |
| parastichopus californicus | 0.35         | 0.90           | West U.S.     | 26         | high           | 493.4        | 498.1           | 68.3         | 87.9          |
|                            |              |                |               | 85         | low            | 1611.3       | 528.5           | 392.8        | 275.8         |
| pareques iwamotoi          | 0.35         | 0.92           | G. Mexico     | 26         | medium         | 56.5         | 60.1            | 56.1         | 67.9          |
|                            |              |                |               | 85         | low            | 182.6        | 116.8           | 69.0         | 153.1         |
| pareques umbrosus          | 0.33         | 0.96           | SE U.S.       | 26         | medium         | 41.1         | 42.3            | 143.0        | 126.7         |
|                            |              |                |               | 85         | medium         | 93.5         | 61.7            | 981.2        | 757.7         |
|                            |              |                | G. Mexico     | 26         | medium         | 20.9         | 24.8            | 3.5          | 10.0          |
|                            |              |                |               | 85         | low            | 49.6         | 41.2            | -11.7        | 23.8          |
| parmaturus xaniurus        | 0.48         | 0.93           | West U.S.     | 26         | medium         | 319.6        | 308.6           | 18.1         | 48.4          |
|                            |              |                |               | 85         | low            | 1422.8       | 524.0           | 27.7         | 85.9          |
| parophrys vetulus          | 0.53         | 0.88           | West U.S.     | 26         | low            | 270.7        | 208.4           | 36.6         | 26.0          |
|                            |              |                |               | 85         | low            | 1276.1       | 346.1           | 158.0        | 71.6          |
| parthenopoides massena     | 0.35         | 0.90           | G. Mexico     | 26         | medium         | 53.7         | 64.7            | 19.9         | 46.2          |
|                            |              |                |               | 85         | medium         | 316.9        | 165.7           | -69.0        | 38.8          |
| pasiphaea multidentata     | 0.34         | 0.81           | NE U.S.       | 26         | low            | 151.9        | 130.2           | 21.9         | 63.2          |
|                            |              |                |               | 85         | low            | 759.8        | 215.7           | 16.0         | 114.4         |
| pasiphaea pacifica         | 0.29         | 0.14           | G. Alaska     | 26         | low            | 142.7        | 105.2           | 15.8         | 16.2          |
|                            |              |                |               | 85         | low            | 619.9        | 189.7           | 80.0         | 34.0          |
| pasiphaea tarda            | 0.51         | 0.93           | West U.S.     | 26         | medium         | 239.5        | 167.0           | 32.8         | 39.5          |
|                            |              |                |               | 85         | high           | 715.1        | 378.9           | 607.6        | 404.6         |

| <b>Species</b>          | <b>devPA</b> | <b>devBiom</b> | <b>Region</b> | <b>RCP</b> | <b>Uncert.</b> | <b>Shift</b> | <b>sd_shift</b> | <b>%Hab.</b> | <b>sd_hab</b> |
|-------------------------|--------------|----------------|---------------|------------|----------------|--------------|-----------------|--------------|---------------|
| patinopecten caurinus   | 0.23         | 0.13           | G. Alaska     | 26         | low            | 170.5        | 92.3            | 31.7         | 25.9          |
|                         |              |                |               | 85         | low            | 574.1        | 147.2           | 214.1        | 93.0          |
| peprilus burti          | 0.56         | 0.88           | G. Mexico     | 26         | low            | 2.0          | 1.4             | 27.2         | 34.9          |
|                         |              |                |               | 85         | low            | 3.6          | 2.6             | 19.5         | 68.9          |
| peprilus paru           | 0.49         | 0.95           | SE U.S.       | 26         | medium         | 16.7         | 12.5            | 0.3          | 10.6          |
|                         |              |                |               | 85         | medium         | 138.4        | 107.2           | 20.3         | 32.5          |
|                         |              |                | G. Mexico     | 26         | low            | 16.5         | 8.9             | 2.9          | 5.1           |
|                         |              |                |               | 85         | medium         | 22.1         | 10.3            | 1.8          | 13.0          |
| peprilus simillimus     | 0.47         | 0.94           | West U.S.     | 26         | low            | 216.3        | 163.7           | 96.9         | 105.3         |
|                         |              |                |               | 85         | low            | 880.5        | 324.8           | 781.2        | 675.2         |
| peprilus triacanthus    | 0.48         | 0.39           | NE U.S.       | 26         | medium         | 137.5        | 115.4           | 29.7         | 27.1          |
|                         |              |                |               | 85         | medium         | 346.1        | 252.7           | 212.2        | 105.6         |
|                         |              |                | G. Mexico     | 26         | low            | 16.9         | 16.2            | 1.0          | 8.4           |
|                         |              |                |               | 85         | low            | 37.6         | 21.1            | 72.8         | 45.4          |
| periphylla periphylla   | 0.32         | 0.78           | West U.S.     | 26         | high           | 282.8        | 194.5           | 14.5         | 36.9          |
|                         |              |                |               | 85         | medium         | 481.8        | 375.4           | 270.2        | 160.2         |
| peristedion miniatum    | 0.41         | 0.70           | NE U.S.       | 26         | low            | 103.6        | 96.5            | 81.0         | 82.1          |
|                         |              |                |               | 85         | medium         | 467.6        | 356.8           | 528.6        | 479.3         |
|                         |              |                | G. Mexico     | 26         | medium         | 125.9        | 112.8           | -69.7        | 16.3          |
|                         |              |                |               | 85         | high           | 159.9        | 87.5            | -99.4        | 0.5           |
| persephona mediterranea | 0.36         | 0.93           | SE U.S.       | 26         | low            | 20.1         | 14.7            | 75.6         | 89.2          |
|                         |              |                |               | 85         | medium         | 65.3         | 31.4            | 314.1        | 330.0         |
|                         |              |                | G. Mexico     | 26         | low            | 29.4         | 23.3            | 16.2         | 14.1          |
|                         |              |                |               | 85         | medium         | 55.8         | 29.8            | 13.6         | 27.9          |
| petrochirus diogenes    | 0.22         | 0.95           | SE U.S.       | 26         | medium         | 15.5         | 10.3            | 99.7         | 85.6          |
|                         |              |                |               | 85         | medium         | 43.4         | 22.2            | 1493.6       | 771.7         |
|                         |              |                | G. Mexico     | 26         | medium         | 18.3         | 10.6            | 53.6         | 45.8          |
|                         |              |                |               | 85         | medium         | 30.0         | 12.4            | 699.9        | 383.6         |
| phycis chesteri         | 0.43         | 0.83           | E. Canada     | 26         | low            | 87.8         | 57.0            | 10.2         | 15.1          |
|                         |              |                |               | 85         | medium         | 361.0        | 230.1           | 0.2          | 26.6          |
| pilumnus sayi           | 0.34         | 0.95           | SE U.S.       | 26         | low            | 43.4         | 29.9            | 85.3         | 64.9          |
|                         |              |                |               | 85         | low            | 147.1        | 75.3            | 684.3        | 518.7         |
|                         |              |                | G. Mexico     | 26         | medium         | 21.4         | 13.7            | 32.9         | 27.0          |
|                         |              |                |               | 85         | high           | 56.4         | 28.9            | 145.5        | 84.7          |
| pisaster brevispinus    | 0.43         | 0.97           | G. Alaska     | 26         | low            | 350.3        | 250.5           | 27.3         | 20.0          |
|                         |              |                |               | 85         | low            | 1523.6       | 265.5           | 172.0        | 86.2          |
| pitar cordatus          | 0.36         | 0.92           | G. Mexico     | 26         | medium         | 40.9         | 23.4            | 39.7         | 62.6          |
|                         |              |                |               | 85         | low            | 126.2        | 90.1            | 64.6         | 111.9         |

| <b>Species</b>                  | <b>devPA</b> | <b>devBiom</b> | <b>Region</b> | <b>RCP</b> | <b>Uncert.</b> | <b>Shift</b> | <b>sd_shift</b> | <b>%Hab.</b> | <b>sd_hab</b> |
|---------------------------------|--------------|----------------|---------------|------------|----------------|--------------|-----------------|--------------|---------------|
| placopecten magellanicus        | 0.31         | 0.79           | NE U.S.       | 26         | high           | 362.3        | 305.1           | -7.1         | 31.0          |
|                                 |              |                |               | 85         | high           | 721.6        | 445.1           | -38.3        | 32.8          |
| platichthys stellatus           | 0.39         | 0.11           | G. Alaska     | 26         | medium         | 172.8        | 141.6           | 28.2         | 33.3          |
|                                 |              |                |               | 85         | medium         | 737.3        | 412.5           | 132.2        | 126.4         |
| platymera gaudichaudii          | 0.42         | 0.91           | West U.S.     | 26         | low            | 173.8        | 111.1           | 34.3         | 22.5          |
|                                 |              |                |               | 85         | low            | 815.4        | 376.0           | 143.2        | 113.5         |
| pleurobranchaea californica     | 0.53         | 0.91           | West U.S.     | 26         | low            | 231.6        | 165.0           | 38.9         | 35.3          |
|                                 |              |                |               | 85         | low            | 996.6        | 354.4           | 149.0        | 123.5         |
| pleurogrammus monopterygius     | 0.43         | 0.88           | E. Bering S.  | 26         | medium         | 140.7        | 100.6           | -37.0        | 48.8          |
|                                 |              |                |               | 85         | low            | 284.2        | 97.0            | -94.2        | 15.2          |
| pleuronectes quadrituberculatus | 0.70         | 0.95           | E. Bering S.  | 26         | medium         | 94.5         | 71.4            | 1.9          | 173.3         |
|                                 |              |                |               | 85         | medium         | 183.0        | 71.1            | -97.5        | 5.0           |
| pleuronichthys decurrens        | 0.46         | 0.97           | West U.S.     | 26         | low            | 250.8        | 206.1           | 19.9         | 13.9          |
|                                 |              |                |               | 85         | low            | 1258.7       | 332.5           | 96.4         | 70.1          |
| pleuronichthys verticalis       | 0.46         | 0.95           | West U.S.     | 26         | low            | 98.8         | 90.8            | 69.0         | 39.3          |
|                                 |              |                |               | 85         | medium         | 659.7        | 367.1           | 321.6        | 224.0         |
| plicifusus kroeyeri             | 0.35         | 0.97           | E. Bering S.  | 26         | low            | 63.5         | 41.4            | -34.6        | 66.3          |
|                                 |              |                |               | 85         | low            | 136.9        | 62.9            | -97.3        | 5.8           |
| podochela sidneyi               | 0.28         | 0.98           | SE U.S.       | 26         | medium         | 36.5         | 36.0            | 135.1        | 113.2         |
|                                 |              |                |               | 85         | low            | 105.0        | 62.0            | 1141.1       | 653.3         |
|                                 |              |                | G. Mexico     | 26         | high           | 14.0         | 12.6            | 21.4         | 17.9          |
|                                 |              |                |               | 85         | high           | 28.9         | 23.9            | 123.2        | 44.8          |
| pododesmus macrochisma          | 0.24         | 0.94           | E. Bering S.  | 26         | medium         | 90.0         | 58.7            | -39.5        | 44.9          |
|                                 |              |                |               | 85         | low            | 197.6        | 89.2            | -94.1        | 13.2          |
| podothecus accipenserinus       | 0.59         | 0.28           | E. Bering S.  | 26         | low            | 23.6         | 14.5            | -1.2         | 13.4          |
|                                 |              |                |               | 85         | low            | 86.8         | 25.8            | -37.6        | 29.5          |
| pogonias cromis                 | 0.27         | 0.97           | SE U.S.       | 26         | medium         | 53.7         | 60.7            | -4.7         | 9.1           |
|                                 |              |                |               | 85         | high           | 817.7        | 618.0           | 213.6        | 287.2         |
|                                 |              |                | G. Mexico     | 26         | low            | 10.3         | 8.7             | -3.1         | 4.5           |
|                                 |              |                |               | 85         | low            | 25.3         | 14.8            | -2.6         | 13.1          |
| pollachius virens               | 0.39         | 0.90           | E. Canada     | 26         | low            | 134.6        | 76.0            | 11.9         | 16.0          |
|                                 |              |                |               | 85         | medium         | 566.6        | 312.8           | -8.2         | 39.4          |
| polyacanthonotus rissoanus      | 0.52         | 0.92           | E. Canada     | 26         | low            | 145.5        | 88.2            | 5.3          | 15.2          |
|                                 |              |                |               | 85         | low            | 532.0        | 236.6           | -8.0         | 34.1          |
| polydactylus octoemus           | 0.35         | 0.86           | G. Mexico     | 26         | medium         | 21.1         | 15.2            | 42.8         | 31.5          |
|                                 |              |                |               | 85         | low            | 51.1         | 32.0            | 394.6        | 138.1         |



| <b>Species</b>         | <b>devPA</b> | <b>devBiom</b> | <b>Region</b> | <b>RCP</b> | <b>Uncert.</b> | <b>Shift</b> | <b>sd_shift</b> | <b>%Hab.</b> | <b>sd_hab</b> |
|------------------------|--------------|----------------|---------------|------------|----------------|--------------|-----------------|--------------|---------------|
| polymixia lowei        | 0.44         | 0.69           | SE U.S.       | 26         | medium         | 117.5        | 97.2            | 12.6         | 12.3          |
|                        |              |                |               | 85         | medium         | 658.4        | 343.8           | 94.0         | 74.6          |
|                        |              |                | G. Mexico     | 26         | low            | 101.6        | 62.6            | -4.0         | 8.7           |
|                        |              |                |               | 85         | low            | 177.5        | 75.9            | -29.3        | 12.0          |
| polystira albida       | 0.36         | 0.91           | G. Mexico     | 26         | high           | 49.7         | 29.9            | 40.1         | 52.2          |
|                        |              |                |               | 85         | medium         | 106.9        | 97.7            | 55.4         | 117.3         |
| pomatomus saltatrix    | 0.43         | 0.84           | SE U.S.       | 26         | low            | 148.5        | 132.2           | 21.9         | 90.7          |
|                        |              |                |               | 85         | low            | 582.0        | 226.4           | 358.0        | 299.0         |
|                        |              |                | G. Mexico     | 26         | medium         | 26.4         | 16.1            | -26.2        | 15.3          |
|                        |              |                |               | 85         | low            | 73.7         | 44.9            | -72.0        | 13.1          |
| pontinus longispinis   | 0.44         | 0.87           | SE U.S.       | 26         | low            | 14.7         | 11.6            | 195.2        | 158.2         |
|                        |              |                |               | 85         | low            | 53.8         | 38.7            | 1174.6       | 837.5         |
|                        |              |                | G. Mexico     | 26         | low            | 41.7         | 39.5            | 29.9         | 29.1          |
|                        |              |                |               | 85         | low            | 118.1        | 59.5            | 54.6         | 56.5          |
| pontophilus norvegicus | 0.34         | 0.90           | E. Canada     | 26         | low            | 81.3         | 52.7            | 10.3         | 14.1          |
|                        |              |                |               | 85         | medium         | 246.5        | 151.6           | -5.8         | 18.8          |
| poraniopsis inflata    | 0.19         | 0.91           | West U.S.     | 26         | low            | 280.2        | 227.1           | 33.1         | 51.7          |
|                        |              |                |               | 85         | low            | 1315.8       | 362.6           | 142.9        | 124.0         |
| porichthys notatus     | 0.50         | 0.90           | West U.S.     | 26         | low            | 215.3        | 125.3           | 39.6         | 34.9          |
|                        |              |                |               | 85         | low            | 1036.4       | 406.4           | 119.5        | 122.1         |
| porichthys plectrodon  | 0.43         | 0.95           | SE U.S.       | 26         | medium         | 32.5         | 22.7            | 101.7        | 80.0          |
|                        |              |                |               | 85         | low            | 113.1        | 54.4            | 308.1        | 342.0         |
|                        |              |                | G. Mexico     | 26         | low            | 58.2         | 50.4            | -9.7         | 11.4          |
|                        |              |                |               | 85         | medium         | 170.3        | 90.5            | -72.7        | 18.6          |
| portunus gibbesii      | 0.49         | 0.94           | SE U.S.       | 26         | medium         | 28.7         | 33.3            | 106.6        | 100.1         |
|                        |              |                |               | 85         | low            | 68.8         | 37.7            | 868.0        | 600.2         |
|                        |              |                | G. Mexico     | 26         | medium         | 17.7         | 13.6            | 13.4         | 9.0           |
|                        |              |                |               | 85         | medium         | 43.4         | 33.0            | 54.0         | 18.2          |
| priacanthus arenatus   | 0.28         | 0.93           | SE U.S.       | 26         | medium         | 38.2         | 34.9            | 65.6         | 69.9          |
|                        |              |                |               | 85         | low            | 121.8        | 67.0            | 350.7        | 348.0         |
|                        |              |                | G. Mexico     | 26         | medium         | 36.1         | 24.6            | -22.4        | 15.0          |
|                        |              |                |               | 85         | medium         | 98.2         | 61.4            | -77.3        | 16.4          |
| prionotus alatus       | 0.31         | 0.86           | SE U.S.       | 26         | high           | 23.7         | 42.6            | 1757.4       | 2993.2        |
|                        |              |                |               | 85         | medium         | 138.5        | 103.8           | 1.1E+05      | 1.9E+05       |
|                        |              |                | G. Mexico     | 26         | medium         | 36.5         | 29.3            | 212.5        | 196.8         |
|                        |              |                |               | 85         | medium         | 58.4         | 48.6            | 5278.2       | 3762.6        |

| <b>Species</b>          | <b>devPA</b> | <b>devBiom</b> | <b>Region</b> | <b>RCP</b> | <b>Uncert.</b> | <b>Shift</b> | <b>sd_shift</b> | <b>%Hab.</b> | <b>sd_hab</b> |
|-------------------------|--------------|----------------|---------------|------------|----------------|--------------|-----------------|--------------|---------------|
| prionotus carolinus     | 0.41         | 0.74           | SE U.S.       | 26         | low            | 209.6        | 156.5           | 19.6         | 53.2          |
|                         |              |                |               | 85         | low            | 594.9        | 245.1           | 352.1        | 169.3         |
|                         |              |                | G. Mexico     | 26         | low            | 42.6         | 26.7            | -40.7        | 19.3          |
|                         |              |                |               | 85         | low            | 105.3        | 44.8            | -92.1        | 3.4           |
| prionotus evolans       | 0.38         | 0.83           | NE U.S.       | 26         | medium         | 132.5        | 149.0           | 181.5        | 335.9         |
|                         |              |                |               | 85         | high           | 332.2        | 311.9           | 1822.5       | 2413.8        |
| prionotus longispinosus | 0.56         | 0.88           | SE U.S.       | 26         | medium         | 52.5         | 66.4            | 180.3        | 235.6         |
|                         |              |                |               | 85         | low            | 271.2        | 119.2           | 801.3        | 731.8         |
|                         |              |                | G. Mexico     | 26         | medium         | 1.4          | 1.5             | 2.7          | 23.6          |
|                         |              |                |               | 85         | medium         | 2.7          | 3.1             | -50.6        | 35.2          |
| prionotus martis        | 0.45         | 0.91           | G. Mexico     | 26         | high           | 13.4         | 13.4            | 76.8         | 68.2          |
|                         |              |                |               | 85         | low            | 34.8         | 25.0            | 421.7        | 244.5         |
| prionotus ophryas       | 0.34         | 0.97           | SE U.S.       | 26         | medium         | 31.4         | 23.4            | 109.9        | 91.5          |
|                         |              |                |               | 85         | low            | 111.2        | 47.1            | 1000.9       | 635.0         |
|                         |              |                | G. Mexico     | 26         | medium         | 17.0         | 12.0            | 27.8         | 22.1          |
|                         |              |                |               | 85         | high           | 47.0         | 27.8            | 57.8         | 48.3          |
| prionotus paralatus     | 0.52         | 0.90           | SE U.S.       | 26         | medium         | 79.5         | 101.0           | 87.3         | 100.2         |
|                         |              |                |               | 85         | low            | 387.0        | 150.8           | 297.7        | 734.2         |
|                         |              |                | G. Mexico     | 26         | high           | 1.9          | 3.4             | -18.4        | 36.6          |
|                         |              |                |               | 85         | high           | 10.0         | 29.0            | -93.0        | 9.6           |
| prionotus roseus        | 0.37         | 0.97           | SE U.S.       | 26         | medium         | 15.3         | 9.8             | 91.8         | 79.5          |
|                         |              |                |               | 85         | high           | 35.7         | 22.7            | 1822.5       | 995.1         |
|                         |              |                | G. Mexico     | 26         | medium         | 18.8         | 12.0            | 53.4         | 48.6          |
|                         |              |                |               | 85         | low            | 42.6         | 28.7            | 859.2        | 463.0         |
| prionotus rubio         | 0.33         | 0.95           | SE U.S.       | 26         | medium         | 9.2          | 5.1             | 13.1         | 12.4          |
|                         |              |                |               | 85         | low            | 48.3         | 30.0            | 46.5         | 22.1          |
|                         |              |                | G. Mexico     | 26         | medium         | 12.7         | 13.2            | -6.9         | 5.2           |
|                         |              |                |               | 85         | high           | 40.0         | 27.8            | -40.3        | 13.7          |
| prionotus scitulus      | 0.44         | 0.93           | SE U.S.       | 26         | medium         | 15.7         | 19.3            | -7.8         | 13.1          |
|                         |              |                |               | 85         | high           | 434.7        | 429.1           | -3.2         | 68.0          |
|                         |              |                | G. Mexico     | 26         | medium         | 27.3         | 22.8            | -23.3        | 19.2          |
|                         |              |                |               | 85         | medium         | 79.2         | 39.9            | -82.3        | 14.1          |
| prionotus stearnsi      | 0.54         | 0.89           | SE U.S.       | 26         | medium         | 82.7         | 104.5           | 66.7         | 87.9          |
|                         |              |                |               | 85         | low            | 369.2        | 160.3           | 300.4        | 870.6         |
|                         |              |                | G. Mexico     | 26         | low            | 0.4          | 0.4             | -8.1         | 44.2          |
|                         |              |                |               | 85         | high           | 1.5          | 2.4             | -91.7        | 11.1          |

| <b>Species</b>                | <b>devPA</b> | <b>devBiom</b> | <b>Region</b> | <b>RCP</b> | <b>Uncert.</b> | <b>Shift</b> | <b>sd_shift</b> | <b>%Hab.</b> | <b>sd_hab</b> |
|-------------------------------|--------------|----------------|---------------|------------|----------------|--------------|-----------------|--------------|---------------|
| prionotus tribulus            | 0.32         | 0.95           | SE U.S.       | 26         | low            | 9.9          | 7.3             | 18.2         | 14.4          |
|                               |              |                |               | 85         | low            | 66.1         | 52.1            | 70.9         | 26.3          |
|                               |              |                | G. Mexico     | 26         | medium         | 16.8         | 18.0            | -2.2         | 4.1           |
|                               |              |                |               | 85         | medium         | 51.4         | 45.8            | -31.2        | 14.0          |
| pristigenys alta              | 0.25         | 0.92           | SE U.S.       | 26         | high           | 22.4         | 17.1            | 197.0        | 203.0         |
|                               |              |                |               | 85         | high           | 50.8         | 42.5            | 12873.8      | 13755.2       |
|                               |              |                | G. Mexico     | 26         | medium         | 20.2         | 12.5            | 141.2        | 147.5         |
|                               |              |                |               | 85         | medium         | 31.7         | 23.3            | 9417.5       | 11106.2       |
| pristipomoides aquilonaris    | 0.57         | 0.89           | SE U.S.       | 26         | high           | 71.7         | 93.9            | 81.3         | 93.5          |
|                               |              |                |               | 85         | low            | 333.0        | 154.0           | 307.3        | 830.0         |
|                               |              |                | G. Mexico     | 26         | low            | 0.7          | 0.6             | -12.0        | 34.2          |
|                               |              |                |               | 85         | low            | 2.0          | 2.0             | -88.2        | 13.5          |
| pseudarchaster parelii        | 0.13         | 0.24           | G. Alaska     | 26         | low            | 128.9        | 76.4            | 7.2          | 7.2           |
|                               |              |                |               | 85         | low            | 505.7        | 132.3           | 29.5         | 8.8           |
| pseudopleuronectes americanus | 0.41         | 0.87           | NE U.S.       | 26         | low            | 96.3         | 83.3            | -18.9        | 24.8          |
|                               |              |                |               | 85         | medium         | 394.4        | 235.1           | -68.9        | 29.5          |
| pseudostichopus mollis        | 0.33         | 0.38           | G. Alaska     | 26         | low            | 241.8        | 184.6           | 7.3          | 20.9          |
|                               |              |                |               | 85         | low            | 876.2        | 351.5           | 60.9         | 56.2          |
| psolus squamatus              | 0.31         | 0.13           | G. Alaska     | 26         | medium         | 52.9         | 28.0            | -4.0         | 8.4           |
|                               |              |                |               | 85         | medium         | 206.2        | 120.9           | 28.4         | 31.7          |
| pteraster jordani             | 0.34         | 0.92           | G. Alaska     | 26         | low            | 274.0        | 208.1           | 17.3         | 36.9          |
|                               |              |                |               | 85         | medium         | 1295.7       | 451.9           | 107.5        | 66.9          |
| pteraster militaris           | 0.24         | 0.08           | E. Bering S.  | 26         | medium         | 72.8         | 52.6            | -9.3         | 9.8           |
|                               |              |                |               | 85         | low            | 228.9        | 101.1           | -23.6        | 15.2          |
| pteraster obscurus            | 0.38         | 0.95           | E. Bering S.  | 26         | low            | 47.7         | 27.0            | -44.5        | 42.2          |
|                               |              |                |               | 85         | low            | 161.1        | 70.7            | -97.4        | 5.4           |
| ptilosarcus gurneyi           | 0.17         | 0.88           | West U.S.     | 26         | low            | 293.7        | 163.8           | 40.7         | 25.1          |
|                               |              |                |               | 85         | low            | 1445.1       | 423.1           | 141.3        | 102.4         |
| pycnopodia helianthoides      | 0.27         | 0.14           | G. Alaska     | 26         | low            | 105.2        | 83.7            | 19.8         | 12.4          |
|                               |              |                |               | 85         | low            | 389.1        | 145.9           | 67.4         | 24.9          |
| pyrosoma atlanticum           | 0.35         | 0.66           | West U.S.     | 26         | medium         | 7.7          | 5.8             | 66.5         | 36.4          |
|                               |              |                |               | 85         | medium         | 81.0         | 69.2            | 219.6        | 227.6         |
| pyrulofusus deformis          | 0.27         | 0.97           | E. Bering S.  | 26         | medium         | 97.7         | 76.6            | -14.8        | 117.4         |
|                               |              |                |               | 85         | high           | 352.2        | 410.5           | -98.4        | 3.4           |
| pyrulofusus melonis           | 0.30         | 0.86           | E. Bering S.  | 26         | medium         | 86.9         | 74.1            | -29.7        | 93.2          |
|                               |              |                |               | 85         | low            | 183.2        | 90.1            | -99.3        | 1.6           |

| <b>Species</b>               | <b>devPA</b> | <b>devBiom</b> | <b>Region</b> | <b>RCP</b> | <b>Uncert.</b> | <b>Shift</b> | <b>sd_shift</b> | <b>%Hab.</b> | <b>sd_hab</b> |
|------------------------------|--------------|----------------|---------------|------------|----------------|--------------|-----------------|--------------|---------------|
| rachycentron canadum         | 0.22         | 0.97           | SE U.S.       | 26         | low            | 9.9          | 8.1             | 21.8         | 15.4          |
|                              |              |                |               | 85         | medium         | 128.6        | 124.1           | 91.8         | 32.4          |
|                              |              |                | G. Mexico     | 26         | medium         | 29.7         | 29.4            | 9.4          | 11.8          |
|                              |              |                |               | 85         | low            | 129.4        | 75.2            | -40.3        | 26.3          |
| raja binoculata              | 0.27         | 0.13           | G. Alaska     | 26         | low            | 128.2        | 89.5            | 22.8         | 16.7          |
|                              |              |                |               | 85         | low            | 428.0        | 95.5            | 86.0         | 28.7          |
| raja eglanteria              | 0.49         | 0.93           | SE U.S.       | 26         | medium         | 65.3         | 63.3            | -17.2        | 12.5          |
|                              |              |                |               | 85         | low            | 689.7        | 250.5           | 4.3          | 57.0          |
|                              |              |                | G. Mexico     | 26         | high           | 22.4         | 23.4            | -34.5        | 21.8          |
|                              |              |                |               | 85         | low            | 77.9         | 51.5            | -86.7        | 9.9           |
| raja inornata                | 0.50         | 0.93           | West U.S.     | 26         | low            | 108.3        | 46.7            | 95.3         | 74.9          |
|                              |              |                |               | 85         | medium         | 208.9        | 112.6           | 984.6        | 1487.8        |
| raja rhina                   | 0.42         | 0.22           | G. Alaska     | 26         | low            | 205.4        | 139.2           | 17.4         | 16.1          |
|                              |              |                |               | 85         | low            | 675.3        | 178.3           | 31.8         | 35.0          |
| raja texana                  | 0.34         | 0.90           | G. Mexico     | 26         | high           | 49.3         | 64.4            | 50.5         | 56.8          |
|                              |              |                |               | 85         | medium         | 200.8        | 159.8           | -2.7         | 82.3          |
| rajella fyllae               | 0.33         | 0.84           | E. Canada     | 26         | low            | 87.0         | 65.3            | 1.9          | 19.3          |
|                              |              |                |               | 85         | low            | 182.6        | 72.6            | -36.1        | 28.9          |
| raninoides louisianensis     | 0.42         | 0.91           | G. Mexico     | 26         | high           | 38.5         | 23.1            | 22.7         | 28.4          |
|                              |              |                |               | 85         | medium         | 105.7        | 87.8            | 22.6         | 62.2          |
| rathbunaster californicus    | 0.36         | 0.95           | G. Alaska     | 26         | medium         | 307.7        | 286.2           | 10.1         | 12.2          |
|                              |              |                |               | 85         | low            | 1395.5       | 305.8           | 36.8         | 52.5          |
| reilla mulleri               | 0.43         | 0.90           | G. Mexico     | 26         | medium         | 33.1         | 20.7            | 221.6        | 283.2         |
|                              |              |                |               | 85         | medium         | 96.3         | 61.4            | 10746.4      | 16003.4       |
| reinhardtius hippoglossoides | 0.71         | 0.87           | E. Canada     | 26         | low            | 83.6         | 61.4            | -7.5         | 17.7          |
|                              |              |                |               | 85         | low            | 283.4        | 137.7           | -53.5        | 33.1          |
|                              |              |                | E. Bering S.  | 26         | low            | 33.8         | 27.6            | -41.1        | 41.8          |
|                              |              |                |               | 85         | low            | 160.4        | 83.2            | -95.1        | 9.8           |
| rhinoptera bonasus           | 0.32         | 0.96           | SE U.S.       | 26         | low            | 21.6         | 16.2            | -1.3         | 9.8           |
|                              |              |                |               | 85         | medium         | 292.9        | 213.6           | 38.8         | 45.7          |
|                              |              |                | G. Mexico     | 26         | medium         | 23.7         | 25.5            | -4.9         | 8.6           |
|                              |              |                |               | 85         | medium         | 92.2         | 65.2            | -58.8        | 17.9          |
| rhizoprionodon terraenovae   | 0.49         | 0.98           | SE U.S.       | 26         | low            | 16.6         | 12.3            | -2.2         | 9.0           |
|                              |              |                |               | 85         | low            | 149.9        | 103.8           | -16.6        | 11.8          |
|                              |              |                | G. Mexico     | 26         | low            | 23.4         | 21.4            | -9.6         | 10.1          |
|                              |              |                |               | 85         | low            | 109.1        | 65.7            | -69.3        | 15.3          |

| <b>Species</b>          | <b>devPA</b> | <b>devBiom</b> | <b>Region</b> | <b>RCP</b> | <b>Uncert.</b> | <b>Shift</b> | <b>sd_shift</b> | <b>%Hab.</b> | <b>sd_hab</b> |
|-------------------------|--------------|----------------|---------------|------------|----------------|--------------|-----------------|--------------|---------------|
| rhomboplites aurorubens | 0.38         | 0.87           | SE U.S.       | 26         | high           | 19.4         | 32.0            | 721.3        | 1089.7        |
|                         |              |                |               | 85         | medium         | 253.6        | 178.7           | 10474.9      | 11497.3       |
|                         |              |                | G. Mexico     | 26         | medium         | 27.0         | 28.5            | 76.2         | 70.7          |
|                         |              |                |               | 85         | medium         | 75.7         | 64.1            | 312.0        | 215.6         |
| rhynchoconger flavus    | 0.42         | 0.90           | G. Mexico     | 26         | medium         | 81.2         | 84.8            | -5.0         | 22.0          |
|                         |              |                |               | 85         | medium         | 284.5        | 123.4           | -82.1        | 22.7          |
| rimapenaeus constrictus | 0.40         | 0.87           | SE U.S.       | 26         | low            | 17.7         | 11.3            | 64.4         | 84.7          |
|                         |              |                |               | 85         | high           | 156.6        | 199.8           | 356.4        | 502.3         |
| sabinea hystrix         | 0.54         | 0.89           | E. Canada     | 26         | low            | 175.0        | 98.3            | -8.1         | 12.9          |
|                         |              |                |               | 85         | low            | 524.5        | 214.0           | -11.1        | 44.4          |
| sabinea sarsii          | 0.28         | 0.85           | E. Canada     | 26         | low            | 124.1        | 66.8            | -2.1         | 15.7          |
|                         |              |                |               | 85         | low            | 271.3        | 88.9            | -53.2        | 33.1          |
| sabinea septemcarinata  | 0.50         | 0.87           | E. Canada     | 26         | medium         | 83.9         | 74.6            | -18.4        | 25.8          |
|                         |              |                |               | 85         | low            | 173.5        | 93.9            | -75.2        | 26.0          |
| sagenaster evermanni    | 0.49         | 0.78           | West U.S.     | 26         | high           | 164.7        | 151.8           | 40.5         | 70.7          |
|                         |              |                |               | 85         | high           | 510.7        | 355.5           | 653.7        | 404.1         |
| sardinella aurita       | 0.30         | 0.91           | SE U.S.       | 26         | low            | 11.5         | 9.5             | 25.0         | 23.9          |
|                         |              |                |               | 85         | medium         | 104.9        | 112.6           | 78.8         | 43.7          |
|                         |              |                | G. Mexico     | 26         | low            | 10.0         | 6.7             | 0.5          | 4.2           |
|                         |              |                |               | 85         | low            | 39.2         | 26.9            | -24.1        | 14.5          |
| sardinops sagax         | 0.30         | 0.94           | G. Alaska     | 26         | low            | 327.6        | 216.3           | 35.7         | 28.2          |
|                         |              |                |               | 85         | low            | 1277.3       | 315.3           | 163.2        | 82.6          |
| sarritor frenatus       | 0.28         | 0.92           | E. Bering S.  | 26         | low            | 76.3         | 53.4            | -39.6        | 41.9          |
|                         |              |                |               | 85         | low            | 221.0        | 71.4            | -95.4        | 9.6           |
| saurida brasiliensis    | 0.50         | 0.86           | SE U.S.       | 26         | medium         | 48.2         | 62.3            | 59.3         | 62.1          |
|                         |              |                |               | 85         | low            | 328.0        | 152.2           | 165.0        | 214.0         |
|                         |              |                | G. Mexico     | 26         | low            | 3.0          | 2.4             | -15.8        | 25.1          |
|                         |              |                |               | 85         | low            | 5.4          | 3.7             | -85.8        | 11.9          |
| sclerocrangon boreas    | 0.49         | 0.85           | E. Canada     | 26         | medium         | 108.5        | 85.0            | -18.4        | 34.9          |
|                         |              |                |               | 85         | medium         | 191.3        | 121.9           | -76.9        | 29.9          |
| scomber japonicus       | 0.20         | 0.93           | SE U.S.       | 26         | high           | 21.0         | 12.1            | 28.6         | 30.2          |
|                         |              |                |               | 85         | low            | 156.4        | 104.7           | 168.3        | 114.9         |
|                         |              |                | G. Mexico     | 26         | low            | 62.2         | 55.0            | -11.5        | 14.9          |
|                         |              |                |               | 85         | medium         | 181.9        | 80.5            | -84.0        | 16.6          |
| scomber scombrus        | 0.38         | 0.91           | West U.S.     | 26         | low            | 310.2        | 222.7           | 38.1         | 29.7          |
|                         |              |                |               | 85         | low            | 1604.3       | 364.9           | 189.9        | 116.6         |
| scomber scombrus        | 0.27         | 0.77           | NE U.S.       | 26         | low            | 66.2         | 49.3            | -0.1         | 16.6          |
|                         |              |                |               | 85         | medium         | 314.9        | 266.1           | -54.6        | 18.8          |

| Species                 | devPA | devBiom | Region       | RCP | Uncert. | Shift  | sd_shift | %Hab.   | sd_hab  |
|-------------------------|-------|---------|--------------|-----|---------|--------|----------|---------|---------|
| scomberesox saurus      | 0.22  | 0.73    | E. Canada    | 26  | low     | 60.3   | 54.2     | 456.5   | 955.4   |
|                         |       |         |              | 85  | medium  | 278.2  | 236.1    | 1885.2  | 2785.5  |
| scomberomorus cavalla   | 0.39  | 0.96    | SE U.S.      | 26  | low     | 20.2   | 16.6     | 29.2    | 22.6    |
|                         |       |         |              | 85  | medium  | 157.6  | 131.4    | 120.8   | 57.7    |
|                         |       |         | G. Mexico    | 26  | medium  | 15.9   | 17.2     | 5.4     | 7.2     |
|                         |       |         |              | 85  | low     | 56.8   | 44.8     | -27.3   | 19.8    |
| scomberomorus maculatus | 0.48  | 0.98    | SE U.S.      | 26  | low     | 16.8   | 13.1     | 4.0     | 9.4     |
|                         |       |         |              | 85  | medium  | 265.5  | 242.7    | 40.7    | 45.6    |
|                         |       |         | G. Mexico    | 26  | medium  | 18.5   | 18.9     | -3.0    | 7.9     |
|                         |       |         |              | 85  | medium  | 76.0   | 61.9     | -51.0   | 18.1    |
| scophthalmus aquosus    | 0.42  | 0.83    | NE U.S.      | 26  | medium  | 46.9   | 57.1     | -12.7   | 20.2    |
|                         |       |         |              | 85  | high    | 261.7  | 323.6    | -55.7   | 25.2    |
| scorpaena brasiliensis  | 0.43  | 0.96    | SE U.S.      | 26  | medium  | 88.1   | 89.4     | 302.5   | 336.2   |
|                         |       |         |              | 85  | low     | 349.8  | 168.7    | 11383.7 | 12751.2 |
|                         |       |         | G. Mexico    | 26  | medium  | 21.7   | 23.3     | 42.6    | 39.8    |
|                         |       |         |              | 85  | low     | 77.6   | 43.3     | 124.7   | 93.3    |
| scorpaena calcarata     | 0.39  | 0.96    | SE U.S.      | 26  | low     | 53.4   | 42.1     | 170.3   | 143.5   |
|                         |       |         |              | 85  | low     | 200.7  | 94.0     | 1304.3  | 1228.8  |
|                         |       |         | G. Mexico    | 26  | low     | 27.5   | 22.6     | 32.0    | 32.2    |
|                         |       |         |              | 85  | medium  | 116.0  | 68.5     | -9.9    | 50.9    |
| scyliorhinus retifer    | 0.48  | 0.79    | NE U.S.      | 26  | high    | 112.5  | 152.1    | 132.8   | 199.6   |
|                         |       |         |              | 85  | medium  | 595.9  | 444.5    | 1900.1  | 2811.5  |
| scyllarides nodifer     | 0.37  | 0.85    | SE U.S.      | 26  | high    | 30.0   | 50.5     | 821.5   | 1266.3  |
|                         |       |         |              | 85  | medium  | 281.9  | 208.3    | 17446.4 | 18427.5 |
|                         |       |         | G. Mexico    | 26  | medium  | 17.4   | 21.9     | 71.6    | 73.1    |
|                         |       |         |              | 85  | low     | 47.4   | 39.5     | 371.3   | 260.0   |
| scyllarus chacei        | 0.44  | 0.98    | SE U.S.      | 26  | medium  | 71.7   | 55.6     | 149.9   | 120.3   |
|                         |       |         |              | 85  | low     | 244.1  | 132.8    | 1954.6  | 1591.7  |
|                         |       |         | G. Mexico    | 26  | medium  | 18.7   | 14.1     | 49.2    | 36.4    |
|                         |       |         |              | 85  | medium  | 53.0   | 32.0     | 211.8   | 87.0    |
| sebastes aleutianus     | 0.31  | 0.82    | E. Bering S. | 26  | medium  | 120.3  | 116.7    | -34.1   | 31.5    |
|                         |       |         |              | 85  | low     | 563.0  | 153.7    | -91.5   | 12.8    |
| sebastes alutus         | 0.38  | 0.22    | G. Alaska    | 26  | low     | 203.0  | 121.4    | 1.0     | 6.7     |
|                         |       |         |              | 85  | low     | 768.1  | 136.9    | 7.0     | 15.2    |
| sebastes aurora         | 0.43  | 0.97    | G. Alaska    | 26  | low     | 228.8  | 195.3    | 1.0     | 17.7    |
|                         |       |         |              | 85  | medium  | 1237.7 | 395.9    | -0.3    | 43.2    |
| sebastes babcocki       | 0.32  | 0.88    | G. Alaska    | 26  | low     | 383.7  | 269.4    | 11.4    | 14.7    |
|                         |       |         |              | 85  | low     | 1273.8 | 254.6    | 11.6    | 39.2    |

| <b>Species</b>          | <b>devPA</b> | <b>devBiom</b> | <b>Region</b> | <b>RCP</b> | <b>Uncert.</b> | <b>Shift</b> | <b>sd_shift</b> | <b>%Hab.</b> | <b>sd_hab</b> |
|-------------------------|--------------|----------------|---------------|------------|----------------|--------------|-----------------|--------------|---------------|
| sebastes borealis       | 0.40         | 0.86           | G. Alaska     | 26         | low            | 292.5        | 199.6           | 15.2         | 19.2          |
|                         |              |                |               | 85         | medium         | 907.5        | 264.3           | 20.4         | 35.1          |
| sebastes brevispinis    | 0.34         | 0.88           | G. Alaska     | 26         | low            | 395.9        | 285.6           | 17.1         | 24.1          |
|                         |              |                |               | 85         | medium         | 1406.1       | 287.1           | 81.5         | 63.5          |
| sebastes chlorostictus  | 0.29         | 0.88           | West U.S.     | 26         | low            | 196.9        | 124.2           | 24.6         | 15.5          |
|                         |              |                |               | 85         | low            | 957.4        | 367.7           | 74.6         | 68.3          |
| sebastes crameri        | 0.44         | 0.92           | G. Alaska     | 26         | low            | 257.7        | 196.6           | 7.7          | 13.5          |
|                         |              |                |               | 85         | low            | 1213.0       | 325.7           | 13.4         | 47.5          |
| sebastes diploproa      | 0.46         | 0.93           | G. Alaska     | 26         | low            | 290.0        | 242.8           | 2.2          | 12.1          |
|                         |              |                |               | 85         | medium         | 1312.4       | 298.0           | -2.6         | 37.1          |
| sebastes elongatus      | 0.42         | 0.94           | G. Alaska     | 26         | low            | 294.2        | 198.2           | 10.6         | 20.1          |
|                         |              |                |               | 85         | low            | 1294.8       | 320.5           | 52.9         | 54.5          |
| sebastes entomelas      | 0.28         | 0.95           | G. Alaska     | 26         | low            | 337.3        | 301.8           | 9.1          | 15.2          |
|                         |              |                |               | 85         | low            | 1447.5       | 260.5           | 50.3         | 47.0          |
| sebastes fasciatus      | 0.52         | 0.73           | NE U.S.       | 26         | medium         | 57.4         | 73.3            | 12.5         | 66.2          |
|                         |              |                |               | 85         | medium         | 809.2        | 393.4           | -45.2        | 65.2          |
| sebastes flavidus       | 0.36         | 0.09           | E. Bering S.  | 26         | low            | 78.2         | 65.6            | -3.7         | 11.7          |
|                         |              |                |               | 85         | low            | 227.4        | 127.5           | -28.8        | 20.5          |
| sebastes goodei         | 0.42         | 0.87           | West U.S.     | 26         | medium         | 234.5        | 214.0           | 1.3          | 13.9          |
|                         |              |                |               | 85         | high           | 861.5        | 317.9           | 80.3         | 196.2         |
| sebastes helvomaculatus | 0.28         | 0.94           | G. Alaska     | 26         | low            | 306.4        | 225.1           | 12.1         | 25.5          |
|                         |              |                |               | 85         | low            | 1423.2       | 357.3           | 80.3         | 62.1          |
| sebastes jordani        | 0.38         | 0.88           | West U.S.     | 26         | low            | 158.5        | 110.1           | 18.7         | 12.8          |
|                         |              |                |               | 85         | medium         | 736.2        | 434.5           | 64.9         | 89.8          |
| sebastes melanostictus  | 0.28         | 0.85           | E. Bering S.  | 26         | low            | 88.1         | 79.0            | -35.7        | 35.8          |
|                         |              |                |               | 85         | medium         | 447.7        | 152.3           | -95.6        | 6.2           |
| sebastes melanostomus   | 0.38         | 0.90           | West U.S.     | 26         | medium         | 308.4        | 285.4           | 6.8          | 20.1          |
|                         |              |                |               | 85         | low            | 1652.7       | 666.3           | 13.2         | 34.9          |
| sebastes mentella       | 0.61         | 0.80           | E. Canada     | 26         | low            | 99.6         | 57.8            | -8.3         | 28.2          |
|                         |              |                |               | 85         | medium         | 262.2        | 156.4           | -61.3        | 33.8          |
| sebastes paucispinis    | 0.34         | 0.95           | G. Alaska     | 26         | medium         | 339.3        | 373.6           | 11.8         | 13.6          |
|                         |              |                |               | 85         | low            | 1587.8       | 313.5           | 68.8         | 60.7          |
| sebastes pinniger       | 0.34         | 0.95           | G. Alaska     | 26         | low            | 318.3        | 230.3           | 17.4         | 20.1          |
|                         |              |                |               | 85         | low            | 1343.7       | 300.4           | 92.7         | 51.1          |
| sebastes polyspinis     | 0.37         | 0.85           | E. Bering S.  | 26         | low            | 90.5         | 64.4            | -28.6        | 56.1          |
|                         |              |                |               | 85         | low            | 166.6        | 51.1            | -96.9        | 6.7           |
| sebastes proriger       | 0.27         | 0.84           | G. Alaska     | 26         | low            | 407.3        | 330.3           | 10.5         | 26.0          |
|                         |              |                |               | 85         | medium         | 1714.0       | 324.5           | 130.6        | 90.5          |

| <b>Species</b>         | <b>devPA</b> | <b>devBiom</b> | <b>Region</b> | <b>RCP</b> | <b>Uncert.</b> | <b>Shift</b> | <b>sd_shift</b> | <b>%Hab.</b> | <b>sd_hab</b> |
|------------------------|--------------|----------------|---------------|------------|----------------|--------------|-----------------|--------------|---------------|
| sebastes ruberrimus    | 0.17         | 0.86           | G. Alaska     | 26         | low            | 253.5        | 227.3           | 24.8         | 26.8          |
|                        |              |                |               | 85         | medium         | 718.6        | 419.6           | 122.4        | 91.8          |
| sebastes saxicola      | 0.42         | 0.92           | G. Alaska     | 26         | medium         | 299.4        | 315.8           | 7.1          | 19.5          |
|                        |              |                |               | 85         | low            | 1084.2       | 346.4           | 31.0         | 54.5          |
| sebastes semicinctus   | 0.47         | 0.92           | West U.S.     | 26         | low            | 206.5        | 149.2           | 55.9         | 44.6          |
|                        |              |                |               | 85         | medium         | 644.2        | 363.4           | 355.2        | 251.6         |
| sebastes variabilis    | 0.26         | 0.80           | E. Bering S.  | 26         | low            | 274.3        | 175.2           | 16.8         | 49.8          |
|                        |              |                |               | 85         | low            | 733.9        | 201.5           | -8.7         | 123.1         |
| sebastes variegatus    | 0.32         | 0.04           | G. Alaska     | 26         | low            | 67.5         | 40.6            | 3.3          | 4.6           |
|                        |              |                |               | 85         | low            | 266.6        | 83.9            | 22.7         | 10.5          |
| sebastes wilsoni       | 0.19         | 0.91           | G. Alaska     | 26         | low            | 300.1        | 185.7           | 27.5         | 29.2          |
|                        |              |                |               | 85         | low            | 1261.7       | 355.8           | 110.7        | 85.6          |
| sebastes zacentrus     | 0.29         | 0.83           | G. Alaska     | 26         | low            | 447.1        | 368.5           | 18.0         | 26.0          |
|                        |              |                |               | 85         | low            | 1614.5       | 379.2           | 92.0         | 49.6          |
| sebastolobus alascanus | 0.50         | 0.89           | West U.S.     | 26         | high           | 217.6        | 157.3           | 16.7         | 22.0          |
|                        |              |                |               | 85         | high           | 682.0        | 268.0           | 144.7        | 109.6         |
| sebastolobus altivelis | 0.69         | 0.96           | G. Alaska     | 26         | high           | 242.2        | 222.5           | -6.4         | 17.9          |
|                        |              |                |               | 85         | medium         | 1075.6       | 405.8           | 124.2        | 97.7          |
| selar crumenophthalmus | 0.23         | 0.91           | SE U.S.       | 26         | low            | 14.3         | 9.1             | 25.5         | 15.0          |
|                        |              |                |               | 85         | medium         | 99.0         | 110.6           | 135.5        | 58.0          |
|                        |              |                | G. Mexico     | 26         | medium         | 19.3         | 18.6            | -0.1         | 6.6           |
|                        |              |                |               | 85         | low            | 50.1         | 30.6            | -19.9        | 17.0          |
| selene setapinnis      | 0.42         | 0.90           | SE U.S.       | 26         | low            | 17.3         | 13.0            | 34.6         | 20.9          |
|                        |              |                |               | 85         | high           | 162.3        | 177.2           | 223.9        | 120.2         |
|                        |              |                | G. Mexico     | 26         | medium         | 10.5         | 5.6             | 6.4          | 8.7           |
|                        |              |                |               | 85         | medium         | 33.0         | 17.4            | 22.6         | 15.8          |
| selene vomer           | 0.42         | 0.95           | SE U.S.       | 26         | low            | 11.6         | 7.3             | 48.0         | 37.0          |
|                        |              |                |               | 85         | low            | 63.8         | 44.3            | 257.8        | 128.4         |
|                        |              |                | G. Mexico     | 26         | medium         | 15.4         | 16.6            | 9.6          | 9.2           |
|                        |              |                |               | 85         | low            | 47.7         | 40.6            | 0.3          | 20.0          |
| sergestes arcticus     | 0.50         | 0.85           | E. Canada     | 26         | low            | 123.8        | 102.8           | 2.8          | 14.5          |
|                        |              |                |               | 85         | low            | 421.8        | 154.5           | -32.3        | 25.8          |
| sergia robusta         | 0.53         | 0.90           | E. Canada     | 26         | medium         | 151.2        | 127.7           | 14.3         | 22.6          |
|                        |              |                |               | 85         | low            | 543.4        | 220.1           | 67.5         | 123.2         |
| seriola dumerili       | 0.20         | 0.92           | SE U.S.       | 26         | high           | 67.9         | 103.7           | 445.4        | 520.7         |
|                        |              |                |               | 85         | low            | 377.0        | 170.2           | 19592.7      | 27935.6       |
|                        |              |                | G. Mexico     | 26         | medium         | 52.5         | 52.0            | 56.3         | 64.5          |
|                        |              |                |               | 85         | medium         | 252.5        | 162.1           | 9.9          | 124.2         |



| Species                  | devPA | devBiom | Region       | RCP | Uncert. | Shift | sd_shift | %Hab.   | sd_hab  |
|--------------------------|-------|---------|--------------|-----|---------|-------|----------|---------|---------|
| serranus atrobranchus    | 0.59  | 0.89    | SE U.S.      | 26  | medium  | 72.6  | 91.8     | 112.9   | 124.0   |
|                          |       |         |              | 85  | low     | 300.9 | 131.1    | 748.3   | 1214.3  |
|                          |       |         | G. Mexico    | 26  | medium  | 41.7  | 52.9     | 13.1    | 29.1    |
|                          |       |         |              | 85  | medium  | 101.4 | 110.1    | -45.3   | 40.6    |
| serranus phoebe          | 0.40  | 0.85    | SE U.S.      | 26  | high    | 27.4  | 59.1     | 1191.4  | 1650.4  |
|                          |       |         |              | 85  | medium  | 151.7 | 141.3    | 2.1E+05 | 2.0E+05 |
|                          |       |         | G. Mexico    | 26  | high    | 36.0  | 19.6     | 464.5   | 541.9   |
|                          |       |         |              | 85  | low     | 73.0  | 56.9     | 1.3E+05 | 2.0E+05 |
| serratiflustra serrulata | 0.23  | 0.95    | E. Bering S. | 26  | medium  | 50.2  | 30.9     | -35.0   | 68.4    |
|                          |       |         |              | 85  | low     | 111.8 | 50.4     | -99.0   | 2.1     |
| serripes groenlandicus   | 0.18  | 0.94    | E. Bering S. | 26  | low     | 43.0  | 27.2     | -42.1   | 46.0    |
|                          |       |         |              | 85  | low     | 109.5 | 48.4     | -96.9   | 6.0     |
| serrivomer beanii        | 0.60  | 0.91    | E. Canada    | 26  | low     | 156.1 | 105.1    | 3.8     | 18.6    |
|                          |       |         |              | 85  | low     | 266.8 | 132.0    | 3.2     | 31.2    |
| sicyonia brevirostris    | 0.43  | 0.94    | SE U.S.      | 26  | low     | 62.1  | 50.5     | 156.3   | 151.4   |
|                          |       |         |              | 85  | low     | 188.4 | 78.7     | 2028.4  | 1625.2  |
|                          |       |         | G. Mexico    | 26  | low     | 66.1  | 62.3     | 3.4     | 18.5    |
|                          |       |         |              | 85  | medium  | 259.7 | 140.3    | -71.1   | 24.6    |
| sicyonia burkenroadi     | 0.32  | 0.91    | G. Mexico    | 26  | medium  | 90.4  | 91.1     | 5.7     | 31.2    |
|                          |       |         |              | 85  | medium  | 295.9 | 146.6    | -76.1   | 30.3    |
| sicyonia dorsalis        | 0.45  | 0.88    | G. Mexico    | 26  | low     | 62.2  | 58.3     | 16.0    | 29.4    |
|                          |       |         |              | 85  | low     | 139.1 | 97.3     | -47.8   | 39.2    |
| siliqua alta             | 0.44  | 0.97    | E. Bering S. | 26  | low     | 21.5  | 19.3     | -26.0   | 28.4    |
|                          |       |         |              | 85  | high    | 95.0  | 132.6    | -87.8   | 14.4    |
| solaster endeca          | 0.23  | 0.79    | E. Canada    | 26  | medium  | 127.6 | 110.8    | -16.5   | 36.6    |
|                          |       |         |              | 85  | high    | 294.1 | 272.7    | -72.8   | 20.6    |
| sphoeroides dorsalis     | 0.44  | 0.95    | SE U.S.      | 26  | medium  | 51.7  | 58.0     | 385.0   | 442.1   |
|                          |       |         |              | 85  | low     | 234.5 | 109.7    | 9517.5  | 8929.8  |
|                          |       |         | G. Mexico    | 26  | low     | 24.2  | 20.0     | 52.2    | 47.8    |
|                          |       |         |              | 85  | medium  | 58.0  | 44.1     | 263.2   | 149.0   |
| sphoeroides maculatus    | 0.43  | 0.84    | SE U.S.      | 26  | medium  | 166.3 | 196.3    | -13.7   | 21.9    |
|                          |       |         |              | 85  | low     | 770.0 | 232.8    | 180.9   | 390.5   |
| sphoeroides parvus       | 0.44  | 0.87    | G. Mexico    | 26  | medium  | 1.0   | 1.2      | 24.7    | 44.5    |
|                          |       |         |              | 85  | medium  | 2.5   | 2.9      | -24.2   | 57.0    |
| sphoeroides spengleri    | 0.43  | 0.97    | SE U.S.      | 26  | high    | 48.6  | 74.9     | 283.3   | 244.1   |
|                          |       |         |              | 85  | low     | 353.2 | 171.2    | 5945.9  | 6731.5  |
|                          |       |         | G. Mexico    | 26  | medium  | 25.3  | 25.2     | 111.5   | 89.6    |
|                          |       |         |              | 85  | low     | 111.1 | 55.0     | 576.9   | 311.7   |

| <b>Species</b>            | <b>devPA</b> | <b>devBiom</b> | <b>Region</b> | <b>RCP</b> | <b>Uncert.</b> | <b>Shift</b> | <b>sd_shift</b> | <b>%Hab.</b> | <b>sd_hab</b> |
|---------------------------|--------------|----------------|---------------|------------|----------------|--------------|-----------------|--------------|---------------|
| sphyraena borealis        | 0.43         | 0.90           | SE U.S.       | 26         | low            | 12.2         | 6.5             | 44.9         | 31.9          |
|                           |              |                |               | 85         | low            | 57.5         | 26.3            | 253.7        | 119.8         |
|                           |              |                | G. Mexico     | 26         | low            | 16.9         | 13.1            | 8.6          | 7.5           |
|                           |              |                |               | 85         | low            | 36.8         | 25.3            | 7.4          | 16.2          |
| sphyraena guachancho      | 0.33         | 0.96           | SE U.S.       | 26         | medium         | 19.7         | 15.8            | 88.1         | 70.1          |
|                           |              |                |               | 85         | low            | 72.1         | 33.8            | 828.2        | 461.0         |
|                           |              |                | G. Mexico     | 26         | medium         | 32.9         | 33.2            | 53.7         | 38.5          |
|                           |              |                |               | 85         | low            | 78.1         | 53.7            | 196.0        | 91.1          |
| sphyrna tiburo            | 0.49         | 0.98           | SE U.S.       | 26         | low            | 18.3         | 13.7            | 35.8         | 29.9          |
|                           |              |                |               | 85         | medium         | 82.3         | 94.3            | 127.0        | 114.5         |
|                           |              |                | G. Mexico     | 26         | medium         | 19.7         | 15.4            | -15.4        | 11.2          |
|                           |              |                |               | 85         | medium         | 47.2         | 32.3            | -60.1        | 15.0          |
| spirontocaris lilljeborgi | 0.26         | 0.80           | E. Canada     | 26         | low            | 116.4        | 67.6            | -10.3        | 16.1          |
|                           |              |                |               | 85         | low            | 285.5        | 133.9           | -52.7        | 41.6          |
| spirontocaris spinus      | 0.51         | 0.84           | E. Canada     | 26         | low            | 141.4        | 87.3            | -19.5        | 26.1          |
|                           |              |                |               | 85         | medium         | 273.9        | 118.3           | -74.3        | 28.2          |
| squalus acanthias         | 0.41         | 0.91           | E. Canada     | 26         | low            | 96.4         | 71.5            | 2.6          | 8.1           |
|                           |              |                |               | 85         | low            | 483.5        | 212.7           | -31.6        | 24.4          |
|                           |              |                | G. Alaska     | 26         | low            | 501.4        | 374.8           | 199.7        | 585.0         |
|                           |              |                |               | 85         | medium         | 1397.9       | 380.2           | 432.1        | 284.1         |
| squalus suckleyi          | 0.38         | 0.63           | West U.S.     | 26         | low            | 194.2        | 153.5           | 34.8         | 19.7          |
|                           |              |                |               | 85         | medium         | 646.0        | 355.1           | 139.4        | 153.8         |
| squatina dumeril          | 0.31         | 0.94           | SE U.S.       | 26         | low            | 33.9         | 27.5            | 9.0          | 25.1          |
|                           |              |                |               | 85         | low            | 65.4         | 45.3            | 87.9         | 43.1          |
|                           |              |                | G. Mexico     | 26         | medium         | 41.0         | 36.8            | -15.4        | 15.0          |
|                           |              |                |               | 85         | medium         | 127.8        | 79.2            | -76.7        | 16.3          |
| squilla chydrea           | 0.45         | 0.91           | G. Mexico     | 26         | medium         | 43.7         | 47.2            | 64.8         | 70.4          |
|                           |              |                |               | 85         | low            | 145.0        | 96.4            | 256.3        | 235.7         |
| squilla empusa            | 0.44         | 0.95           | SE U.S.       | 26         | low            | 52.1         | 44.5            | 189.9        | 191.7         |
|                           |              |                |               | 85         | low            | 122.7        | 64.3            | 2853.2       | 2201.0        |
|                           |              |                | G. Mexico     | 26         | low            | 17.5         | 13.5            | 32.1         | 27.2          |
|                           |              |                |               | 85         | low            | 55.2         | 19.5            | 131.2        | 68.3          |
| stegophiura ponderosa     | 0.31         | 0.82           | G. Alaska     | 26         | low            | 278.9        | 232.5           | 13.1         | 23.2          |
|                           |              |                |               | 85         | medium         | 900.9        | 436.8           | 64.7         | 43.4          |
| steindachneria argentea   | 0.53         | 0.90           | G. Mexico     | 26         | medium         | 9.7          | 6.3             | 54.1         | 44.6          |
|                           |              |                |               | 85         | high           | 15.0         | 8.8             | 580.6        | 303.2         |

| <b>Species</b>                    | <b>devPA</b> | <b>devBiom</b> | <b>Region</b> | <b>RCP</b> | <b>Uncert.</b> | <b>Shift</b> | <b>sd_shift</b> | <b>%Hab.</b> | <b>sd_hab</b> |
|-----------------------------------|--------------|----------------|---------------|------------|----------------|--------------|-----------------|--------------|---------------|
| stellifer lanceolatus             | 0.43         | 0.97           | SE U.S.       | 26         | low            | 16.3         | 14.3            | 48.0         | 43.6          |
|                                   |              |                |               | 85         | low            | 89.4         | 52.8            | 247.7        | 180.8         |
|                                   |              |                | G. Mexico     | 26         | high           | 20.6         | 11.7            | 0.2          | 9.2           |
|                                   |              |                |               | 85         | high           | 69.3         | 68.7            | -47.9        | 27.2          |
| stenobrachius leucopsarus         | 0.19         | 0.83           | West U.S.     | 26         | medium         | 218.8        | 206.8           | 22.5         | 18.9          |
|                                   |              |                |               | 85         | low            | 1124.1       | 274.8           | 81.6         | 34.9          |
| stenocionops furcatus             | 0.37         | 0.91           | G. Mexico     | 26         | medium         | 40.6         | 35.7            | 136.0        | 136.9         |
|                                   |              |                |               | 85         | medium         | 98.4         | 80.0            | 986.5        | 807.7         |
| stenorhynchus seticornis          | 0.36         | 0.98           | SE U.S.       | 26         | low            | 111.3        | 101.9           | 245.0        | 284.8         |
|                                   |              |                |               | 85         | medium         | 324.3        | 207.3           | 3430.0       | 3304.0        |
|                                   |              |                | G. Mexico     | 26         | medium         | 38.2         | 44.7            | 16.6         | 22.2          |
|                                   |              |                |               | 85         | medium         | 149.3        | 94.4            | -18.5        | 44.0          |
| stenotomus caprinus               | 0.67         | 0.89           | G. Mexico     | 26         | high           | 14.8         | 22.6            | -2.8         | 26.0          |
|                                   |              |                |               | 85         | medium         | 34.9         | 44.2            | -72.9        | 20.5          |
| stenotomus chrysops               | 0.50         | 0.75           | NE U.S.       | 26         | medium         | 183.8        | 203.2           | 43.0         | 100.2         |
|                                   |              |                |               | 85         | high           | 338.8        | 433.2           | 950.4        | 928.9         |
| stephanolepis hispidus            | 0.34         | 0.89           | SE U.S.       | 26         | low            | 15.9         | 12.9            | 73.9         | 58.9          |
|                                   |              |                |               | 85         | low            | 48.1         | 19.7            | 637.7        | 306.9         |
|                                   |              |                | G. Mexico     | 26         | low            | 9.2          | 6.8             | 25.7         | 19.7          |
|                                   |              |                |               | 85         | medium         | 12.7         | 8.4             | 174.3        | 56.3          |
| stereomastis sculpta              | 0.61         | 0.89           | E. Canada     | 26         | low            | 132.5        | 72.8            | 3.0          | 13.5          |
|                                   |              |                |               | 85         | low            | 365.8        | 129.8           | -16.9        | 26.5          |
| stomias ferox                     | 0.62         | 0.85           | E. Canada     | 26         | medium         | 139.3        | 115.6           | 4.3          | 14.3          |
|                                   |              |                |               | 85         | low            | 410.9        | 140.6           | -12.6        | 32.4          |
| stomolophus meleagris             | 0.58         | 0.94           | SE U.S.       | 26         | medium         | 22.1         | 16.4            | 122.5        | 128.8         |
|                                   |              |                |               | 85         | medium         | 91.9         | 95.9            | 2586.9       | 3021.9        |
|                                   |              |                | G. Mexico     | 26         | medium         | 43.8         | 31.5            | 61.3         | 65.2          |
|                                   |              |                |               | 85         | high           | 145.1        | 152.7           | 1317.0       | 1393.6        |
| stomphia coccinea                 | 0.17         | 0.89           | E. Bering S.  | 26         | medium         | 49.7         | 39.2            | -46.5        | 51.0          |
|                                   |              |                |               | 85         | low            | 109.2        | 49.1            | -98.7        | 2.9           |
| strongylocentrotus droebachiensis | 0.34         | 0.81           | E. Canada     | 26         | medium         | 173.3        | 162.5           | -1.6         | 120.9         |
|                                   |              |                |               | 85         | medium         | 872.6        | 462.4           | -80.3        | 26.8          |
| strongylocentrotus fragilis       | 0.32         | 0.30           | G. Alaska     | 26         | low            | 144.2        | 90.2            | 17.9         | 15.5          |
|                                   |              |                |               | 85         | low            | 461.3        | 140.5           | 85.2         | 30.3          |
| strongylocentrotus polyacanthus   | 0.27         | 0.94           | E. Bering S.  | 26         | low            | 95.8         | 51.5            | -30.6        | 51.2          |
|                                   |              |                |               | 85         | low            | 235.7        | 86.0            | -89.6        | 18.9          |
| styela rustica                    | 0.33         | 0.88           | E. Bering S.  | 26         | medium         | 96.1         | 92.9            | -40.8        | 53.8          |
|                                   |              |                |               | 85         | low            | 225.2        | 89.1            | -97.0        | 7.3           |

| <b>Species</b>         | <b>devPA</b> | <b>devBiom</b> | <b>Region</b> | <b>RCP</b> | <b>Uncert.</b> | <b>Shift</b> | <b>sd_shift</b> | <b>%Hab.</b> | <b>sd_hab</b> |
|------------------------|--------------|----------------|---------------|------------|----------------|--------------|-----------------|--------------|---------------|
| stylasterias forreri   | 0.23         | 0.86           | West U.S.     | 26         | low            | 327.9        | 245.1           | 27.1         | 36.5          |
|                        |              |                |               | 85         | low            | 1347.2       | 300.0           | 108.2        | 76.3          |
| syacium gunteri        | 0.52         | 0.88           | SE U.S.       | 26         | high           | 20.0         | 34.9            | 262.3        | 303.8         |
|                        |              |                |               | 85         | low            | 239.5        | 148.9           | 2072.8       | 1481.9        |
|                        |              |                | G. Mexico     | 26         | low            | 1.7          | 1.3             | 25.7         | 38.1          |
|                        |              |                |               | 85         | low            | 2.7          | 1.5             | 61.6         | 234.1         |
| syacium papillosum     | 0.43         | 0.95           | SE U.S.       | 26         | medium         | 23.9         | 14.5            | 95.9         | 71.4          |
|                        |              |                |               | 85         | low            | 90.3         | 34.4            | 674.4        | 418.2         |
|                        |              |                | G. Mexico     | 26         | medium         | 15.6         | 12.4            | 19.4         | 17.7          |
|                        |              |                |               | 85         | medium         | 48.6         | 38.4            | 5.5          | 32.8          |
| symphurus civitatum    | 0.24         | 0.91           | SE U.S.       | 26         | medium         | 15.0         | 19.9            | 228.6        | 207.2         |
|                        |              |                |               | 85         | low            | 98.7         | 52.3            | 3200.0       | 1901.5        |
|                        |              |                | G. Mexico     | 26         | high           | 29.6         | 30.3            | 127.0        | 123.3         |
|                        |              |                |               | 85         | medium         | 43.1         | 48.0            | 1362.1       | 984.8         |
| symphurus diomedeanus  | 0.29         | 0.89           | SE U.S.       | 26         | high           | 41.0         | 55.5            | 231.4        | 294.7         |
|                        |              |                |               | 85         | low            | 220.2        | 118.5           | 3240.6       | 2272.3        |
|                        |              |                | G. Mexico     | 26         | high           | 36.0         | 29.7            | 96.9         | 86.6          |
|                        |              |                |               | 85         | high           | 50.2         | 58.6            | 934.9        | 538.5         |
| symphurus plagiusa     | 0.30         | 0.96           | SE U.S.       | 26         | low            | 12.2         | 9.6             | 4.6          | 6.8           |
|                        |              |                |               | 85         | low            | 68.5         | 48.5            | 4.7          | 12.2          |
|                        |              |                | G. Mexico     | 26         | high           | 16.2         | 13.8            | -5.3         | 7.6           |
|                        |              |                |               | 85         | medium         | 71.2         | 62.6            | -63.0        | 16.8          |
| synaphobranchus kaupii | 0.71         | 0.88           | E. Canada     | 26         | medium         | 164.3        | 127.2           | 7.0          | 13.6          |
|                        |              |                |               | 85         | low            | 475.8        | 156.2           | -17.1        | 34.2          |
| syngnathus fuscus      | 0.25         | 0.61           | SE U.S.       | 26         | low            | 69.3         | 48.8            | 53.1         | 65.0          |
|                        |              |                |               | 85         | low            | 322.1        | 185.7           | 2286.5       | 2349.0        |
|                        |              |                | G. Mexico     | 26         | high           | 9.9          | 7.7             | 58.6         | 63.4          |
|                        |              |                |               | 85         | medium         | 23.6         | 14.9            | 2484.8       | 1889.4        |
| synodus foetens        | 0.58         | 0.96           | SE U.S.       | 26         | low            | 16.3         | 15.0            | -4.5         | 8.4           |
|                        |              |                |               | 85         | medium         | 144.9        | 125.4           | 5.0          | 23.9          |
|                        |              |                | G. Mexico     | 26         | medium         | 16.9         | 11.5            | -9.1         | 9.0           |
|                        |              |                |               | 85         | medium         | 75.1         | 51.8            | -59.3        | 17.7          |
| synodus intermedius    | 0.52         | 0.90           | SE U.S.       | 26         | high           | 27.3         | 39.3            | 837.0        | 1276.8        |
|                        |              |                |               | 85         | medium         | 294.7        | 188.6           | 26651.7      | 35323.1       |
|                        |              |                | G. Mexico     | 26         | medium         | 22.2         | 22.1            | 89.4         | 96.8          |
|                        |              |                |               | 85         | low            | 87.5         | 49.2            | 391.0        | 390.1         |

| Species                      | devPA | devBiom | Region       | RCP | Uncert. | Shift  | sd_shift | %Hab.  | sd_hab |
|------------------------------|-------|---------|--------------|-----|---------|--------|----------|--------|--------|
| synodus poeyi                | 0.40  | 0.85    | SE U.S.      | 26  | high    | 21.1   | 39.4     | 224.7  | 247.3  |
|                              |       |         |              | 85  | low     | 298.6  | 169.1    | 1441.1 | 1296.7 |
|                              |       |         | G. Mexico    | 26  | high    | 11.6   | 22.1     | 31.4   | 60.2   |
|                              |       |         |              | 85  | medium  | 53.6   | 65.8     | -39.9  | 79.6   |
| tactostoma macropus          | 0.36  | 0.97    | G. Alaska    | 26  | medium  | 277.5  | 252.3    | 2.3    | 18.3   |
|                              |       |         |              | 85  | medium  | 1314.8 | 362.4    | 83.9   | 50.3   |
| talismania bifurcata         | 0.42  | 0.85    | West U.S.    | 26  | medium  | 285.4  | 269.2    | 23.7   | 56.3   |
|                              |       |         |              | 85  | medium  | 1091.9 | 510.2    | 456.0  | 313.9  |
| tautogolabrus adspersus      | 0.26  | 0.86    | NE U.S.      | 26  | medium  | 110.8  | 103.4    | -14.1  | 28.0   |
|                              |       |         |              | 85  | medium  | 471.8  | 280.9    | -68.2  | 29.5   |
| tellina lutea                | 0.39  | 0.95    | E. Bering S. | 26  | low     | 58.4   | 38.2     | -34.0  | 57.1   |
|                              |       |         |              | 85  | high    | 232.5  | 211.4    | -96.7  | 6.0    |
| telmessus cheiragonus        | 0.56  | 0.97    | E. Bering S. | 26  | high    | 68.5   | 55.6     | 23.7   | 248.2  |
|                              |       |         |              | 85  | high    | 266.2  | 230.4    | -99.8  | 0.7    |
| terebratalia transversa      | 0.25  | 0.77    | G. Alaska    | 26  | medium  | 247.9  | 239.6    | 62.3   | 71.6   |
|                              |       |         |              | 85  | medium  | 793.9  | 220.4    | 81.5   | 131.2  |
| tethyaster grandis           | 0.32  | 0.90    | G. Mexico    | 26  | high    | 34.0   | 25.4     | 29.6   | 30.5   |
|                              |       |         |              | 85  | medium  | 83.5   | 72.6     | 67.4   | 70.4   |
| thaleichthys pacificus       | 0.31  | 0.20    | G. Alaska    | 26  | low     | 314.8  | 234.7    | 19.3   | 21.8   |
|                              |       |         |              | 85  | low     | 1010.6 | 160.0    | 64.9   | 35.1   |
| theragra chalcogramma        | 0.55  | 0.27    | E. Bering S. | 26  | low     | 68.5   | 55.5     | -6.5   | 6.9    |
|                              |       |         |              | 85  | low     | 176.8  | 90.5     | -44.3  | 21.8   |
| thrissacanthias penicillatus | 0.53  | 0.90    | West U.S.    | 26  | medium  | 193.9  | 167.6    | 19.9   | 41.3   |
|                              |       |         |              | 85  | high    | 621.3  | 333.7    | 112.6  | 113.3  |
| torpedo californica          | 0.35  | 0.92    | West U.S.    | 26  | low     | 207.0  | 124.1    | 47.7   | 29.2   |
|                              |       |         |              | 85  | low     | 858.4  | 323.1    | 219.6  | 132.6  |
| trachinocephalus myops       | 0.47  | 0.91    | SE U.S.      | 26  | low     | 37.8   | 29.8     | 218.3  | 197.5  |
|                              |       |         |              | 85  | low     | 82.3   | 46.4     | 3676.5 | 2174.9 |
|                              |       |         | G. Mexico    | 26  | medium  | 15.9   | 15.4     | 50.8   | 43.9   |
|                              |       |         |              | 85  | low     | 45.7   | 25.5     | 317.8  | 130.3  |
| trachinotus carolinus        | 0.39  | 0.99    | SE U.S.      | 26  | low     | 12.2   | 8.6      | 29.8   | 24.4   |
|                              |       |         |              | 85  | medium  | 123.0  | 93.8     | 93.6   | 49.6   |
|                              |       |         | G. Mexico    | 26  | medium  | 27.2   | 27.9     | 0.3    | 9.2    |
|                              |       |         |              | 85  | medium  | 117.5  | 77.1     | -58.1  | 20.1   |
| trachurus lathami            | 0.39  | 0.93    | SE U.S.      | 26  | medium  | 24.0   | 13.7     | 52.6   | 39.2   |
|                              |       |         |              | 85  | low     | 101.2  | 50.7     | 317.2  | 192.7  |
|                              |       |         | G. Mexico    | 26  | medium  | 43.0   | 42.8     | -9.6   | 13.4   |
|                              |       |         |              | 85  | low     | 153.3  | 101.0    | -69.0  | 19.9   |

| <b>Species</b>         | <b>devPA</b> | <b>devBiom</b> | <b>Region</b> | <b>RCP</b> | <b>Uncert.</b> | <b>Shift</b> | <b>sd_shift</b> | <b>%Hab.</b> | <b>sd_hab</b> |
|------------------------|--------------|----------------|---------------|------------|----------------|--------------|-----------------|--------------|---------------|
| trachurus symmetricus  | 0.32         | 0.91           | G. Alaska     | 26         | low            | 376.7        | 282.6           | 23.8         | 19.0          |
|                        |              |                |               | 85         | low            | 1462.9       | 281.7           | 102.0        | 62.4          |
| trichiurus lepturus    | 0.41         | 0.94           | SE U.S.       | 26         | medium         | 11.5         | 9.3             | 13.1         | 16.5          |
|                        |              |                |               | 85         | medium         | 80.1         | 76.6            | 113.0        | 82.4          |
|                        |              |                | G. Mexico     | 26         | low            | 32.1         | 25.3            | 22.9         | 23.0          |
|                        |              |                |               | 85         | low            | 83.8         | 38.5            | 301.2        | 148.7         |
| trichodon trichodon    | 0.31         | 0.86           | E. Bering S.  | 26         | medium         | 84.5         | 65.5            | 73.5         | 126.2         |
|                        |              |                |               | 85         | low            | 279.6        | 139.1           | 161.8        | 320.0         |
| trichopsetta ventralis | 0.55         | 0.91           | G. Mexico     | 26         | medium         | 0.3          | 0.4             | 37.7         | 60.5          |
|                        |              |                |               | 85         | medium         | 0.8          | 1.3             | -3.6         | 100.6         |
| triglops forficatus    | 0.26         | 0.93           | E. Bering S.  | 26         | low            | 85.8         | 59.5            | -38.1        | 47.8          |
|                        |              |                |               | 85         | low            | 255.9        | 73.5            | -95.3        | 9.4           |
| triglops macellus      | 0.12         | 0.12           | G. Alaska     | 26         | low            | 97.9         | 61.5            | 4.7          | 8.7           |
|                        |              |                |               | 85         | low            | 377.3        | 77.2            | 10.3         | 19.1          |
| triglops murrayi       | 0.35         | 0.77           | E. Canada     | 26         | low            | 95.4         | 77.0            | 30.3         | 66.6          |
|                        |              |                |               | 85         | medium         | 438.8        | 273.7           | 16.7         | 90.5          |
| triglops pingelii      | 0.25         | 0.95           | E. Bering S.  | 26         | low            | 65.1         | 46.2            | -35.2        | 53.1          |
|                        |              |                |               | 85         | low            | 161.8        | 51.0            | -96.6        | 6.3           |
| triglops scepticus     | 0.43         | 0.92           | E. Bering S.  | 26         | low            | 151.4        | 79.4            | -50.4        | 47.0          |
|                        |              |                |               | 85         | low            | 499.4        | 139.2           | -98.6        | 3.3           |
| trinectes maculatus    | 0.43         | 0.95           | SE U.S.       | 26         | low            | 23.1         | 17.2            | 2.9          | 5.4           |
|                        |              |                |               | 85         | high           | 510.3        | 468.9           | 82.8         | 163.3         |
|                        |              |                | G. Mexico     | 26         | low            | 25.7         | 20.3            | -22.8        | 13.9          |
|                        |              |                |               | 85         | medium         | 67.0         | 49.4            | -76.5        | 8.9           |
| tritonia diomedea      | 0.29         | 0.09           | E. Bering S.  | 26         | medium         | 20.6         | 10.7            | 3.6          | 4.2           |
|                        |              |                |               | 85         | medium         | 47.1         | 33.7            | 13.5         | 9.7           |
| ulvaria subbifurcata   | 0.16         | 0.76           | E. Canada     | 26         | medium         | 88.6         | 67.9            | -5.0         | 15.8          |
|                        |              |                |               | 85         | medium         | 492.7        | 318.6           | -45.3        | 33.2          |
| upeneus parvus         | 0.50         | 0.97           | SE U.S.       | 26         | high           | 12.0         | 8.2             | 26.9         | 35.7          |
|                        |              |                |               | 85         | low            | 108.5        | 73.0            | 18.9         | 70.5          |
|                        |              |                | G. Mexico     | 26         | low            | 26.4         | 23.3            | -19.8        | 12.6          |
|                        |              |                |               | 85         | medium         | 57.9         | 33.2            | -43.3        | 13.2          |
| urophycis chuss        | 0.41         | 0.78           | E. Canada     | 26         | high           | 330.1        | 254.7           | -25.3        | 36.1          |
|                        |              |                |               | 85         | high           | 745.1        | 401.6           | -67.7        | 23.4          |
| urophycis cirrata      | 0.50         | 0.92           | G. Mexico     | 26         | medium         | 44.9         | 45.3            | 3.5          | 16.5          |
|                        |              |                |               | 85         | low            | 116.5        | 83.2            | -27.6        | 26.9          |

| <b>Species</b>            | <b>devPA</b> | <b>devBiom</b> | <b>Region</b> | <b>RCP</b> | <b>Uncert.</b> | <b>Shift</b> | <b>sd_shift</b> | <b>%Hab.</b> | <b>sd_hab</b> |
|---------------------------|--------------|----------------|---------------|------------|----------------|--------------|-----------------|--------------|---------------|
| urophycis floridana       | 0.49         | 0.98           | SE U.S.       | 26         | low            | 26.3         | 21.4            | 44.9         | 29.4          |
|                           |              |                |               | 85         | high           | 157.5        | 190.5           | 109.5        | 105.3         |
|                           |              |                | G. Mexico     | 26         | low            | 28.5         | 22.3            | -16.1        | 10.3          |
|                           |              |                |               | 85         | medium         | 77.0         | 41.9            | -61.3        | 12.6          |
| urophycis regia           | 0.46         | 0.78           | SE U.S.       | 26         | medium         | 129.2        | 114.1           | 30.1         | 31.7          |
|                           |              |                |               | 85         | low            | 662.2        | 230.1           | 218.7        | 105.0         |
|                           |              |                | G. Mexico     | 26         | low            | 39.5         | 24.1            | -8.5         | 6.4           |
|                           |              |                |               | 85         | low            | 99.7         | 38.0            | -28.4        | 7.3           |
| urophycis tenuis          | 0.45         | 0.93           | E. Canada     | 26         | low            | 149.4        | 92.8            | 12.4         | 12.7          |
|                           |              |                |               | 85         | low            | 563.6        | 238.7           | 7.7          | 29.6          |
| urticina crassicornis     | 0.19         | 0.23           | G. Alaska     | 26         | low            | 167.5        | 112.2           | 37.1         | 30.0          |
|                           |              |                |               | 85         | low            | 510.3        | 150.5           | 169.7        | 60.8          |
| vampyroteuthis infernalis | 0.44         | 0.95           | G. Alaska     | 26         | medium         | 362.6        | 400.9           | 16.6         | 35.5          |
|                           |              |                |               | 85         | low            | 1630.7       | 561.1           | 230.8        | 104.8         |
| volutopsius fragilis      | 0.26         | 0.89           | E. Bering S.  | 26         | medium         | 72.8         | 58.7            | -29.3        | 59.4          |
|                           |              |                |               | 85         | medium         | 195.6        | 81.1            | -96.3        | 8.7           |
| volutopsius middendorffii | 0.29         | 0.98           | E. Bering S.  | 26         | low            | 51.8         | 35.5            | -33.3        | 35.3          |
|                           |              |                |               | 85         | low            | 180.6        | 93.4            | -87.0        | 22.5          |
| xiphopenaeus kroyeri      | 0.32         | 0.95           | SE U.S.       | 26         | medium         | 17.3         | 17.7            | 91.7         | 93.6          |
|                           |              |                |               | 85         | medium         | 64.8         | 45.6            | 1296.2       | 1107.6        |
|                           |              |                | G. Mexico     | 26         | high           | 28.9         | 15.3            | 29.1         | 28.3          |
|                           |              |                |               | 85         | medium         | 60.1         | 28.6            | 192.3        | 147.2         |
| zalembius rosaceus        | 0.53         | 0.91           | West U.S.     | 26         | low            | 240.0        | 151.9           | 72.1         | 60.1          |
|                           |              |                |               | 85         | low            | 964.3        | 307.1           | 358.3        | 194.8         |
| zaniolepis frenata        | 0.54         | 0.98           | West U.S.     | 26         | low            | 272.6        | 202.3           | 52.7         | 40.8          |
|                           |              |                |               | 85         | low            | 1216.3       | 392.6           | 270.2        | 124.3         |
| zaniolepis latipinnis     | 0.52         | 0.94           | West U.S.     | 26         | low            | 153.0        | 117.1           | 58.6         | 49.3          |
|                           |              |                |               | 85         | low            | 626.8        | 304.0           | 406.8        | 333.9         |
| zaprrora silenus          | 0.24         | 0.76           | E. Bering S.  | 26         | low            | 183.7        | 134.0           | -3.2         | 19.3          |
|                           |              |                |               | 85         | low            | 597.1        | 182.7           | -51.7        | 55.7          |
| zenopsis conchifera       | 0.40         | 0.71           | E. Canada     | 26         | high           | 89.0         | 108.9           | 1.7E+06      | 3.9E+06       |
|                           |              |                |               | 85         | high           | 177.3        | 181.0           | 2.6E+09      | 7.0E+09       |
|                           |              |                | G. Mexico     | 26         | medium         | 0.6          | 0.6             | -66.8        | 22.8          |
|                           |              |                |               | 85         | high           | 1.5          | 2.0             | -99.8        | 0.1           |
| zoarces americanus        | 0.31         | 0.82           | E. Canada     | 26         | medium         | 77.8         | 45.0            | -6.4         | 24.2          |
|                           |              |                |               | 85         | high           | 263.4        | 92.2            | -59.2        | 27.2          |
